# Supplementary material for: Efficient kinetic resolution of racemic 3-nitro-2H-chromene derivatives catalyzed by Takemoto's organocatalyst
Source: Royal Society of Chemistry journal article supplement (doi:10.1039/b922668k), 2010-01-01
Supplement: b922668k.pdf [file b922668k.pdf]

# **Efficient Kinetic Resolution of Racemic 3-Nitro-2H-Chromene Derivatives Catalyzed by Takemoto's Organocatalyst**

Jian-Wu Xie,<sup>a,\*</sup> Li-Ping Fan,<sup>a</sup> Hong Su,<sup>a</sup> Xin-Sheng Li,<sup>a</sup> Dong-Cheng Xu<sup>a</sup>

*Zhejiang Key Laboratory for Reactive Chemistry on Solid Surfaces, Department of Chemistry and  
Life Science, Zhejiang Normal University, Jinhua 321004, China;*

*E-mail: xiejw@zjnu.cn; Fax: 86 579 82282610*

**<sup>1</sup>H, <sup>13</sup>C NMR and HPLC spectra**

### NMR

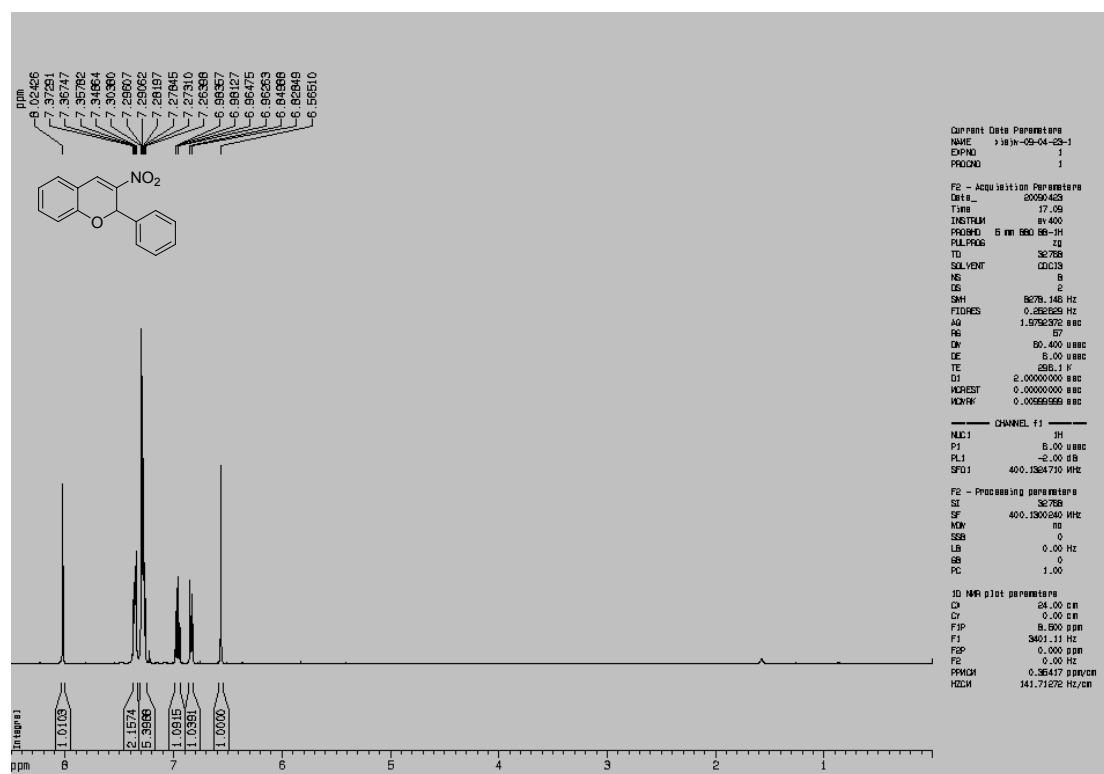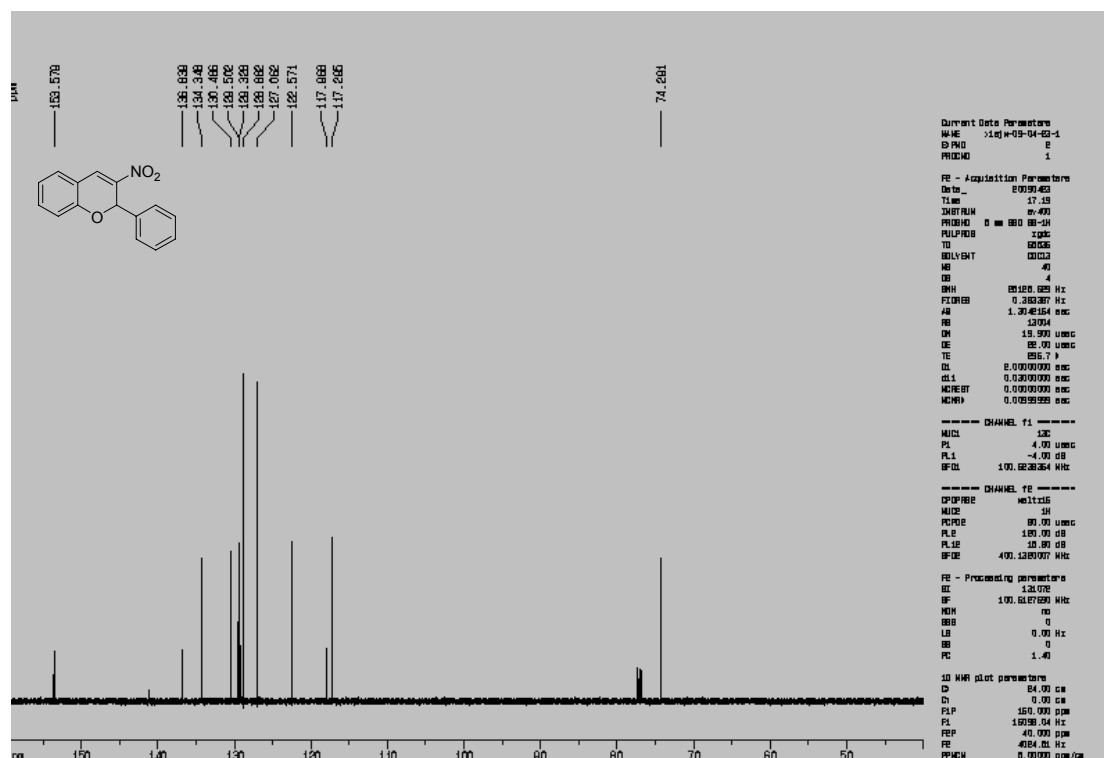

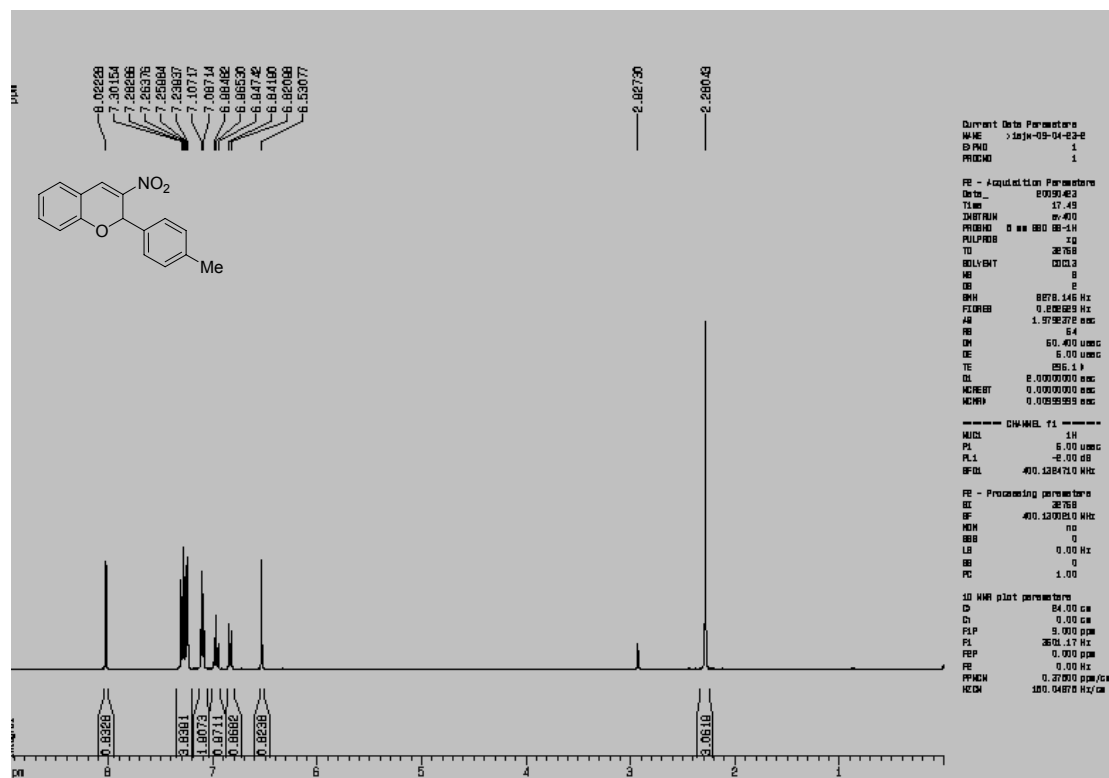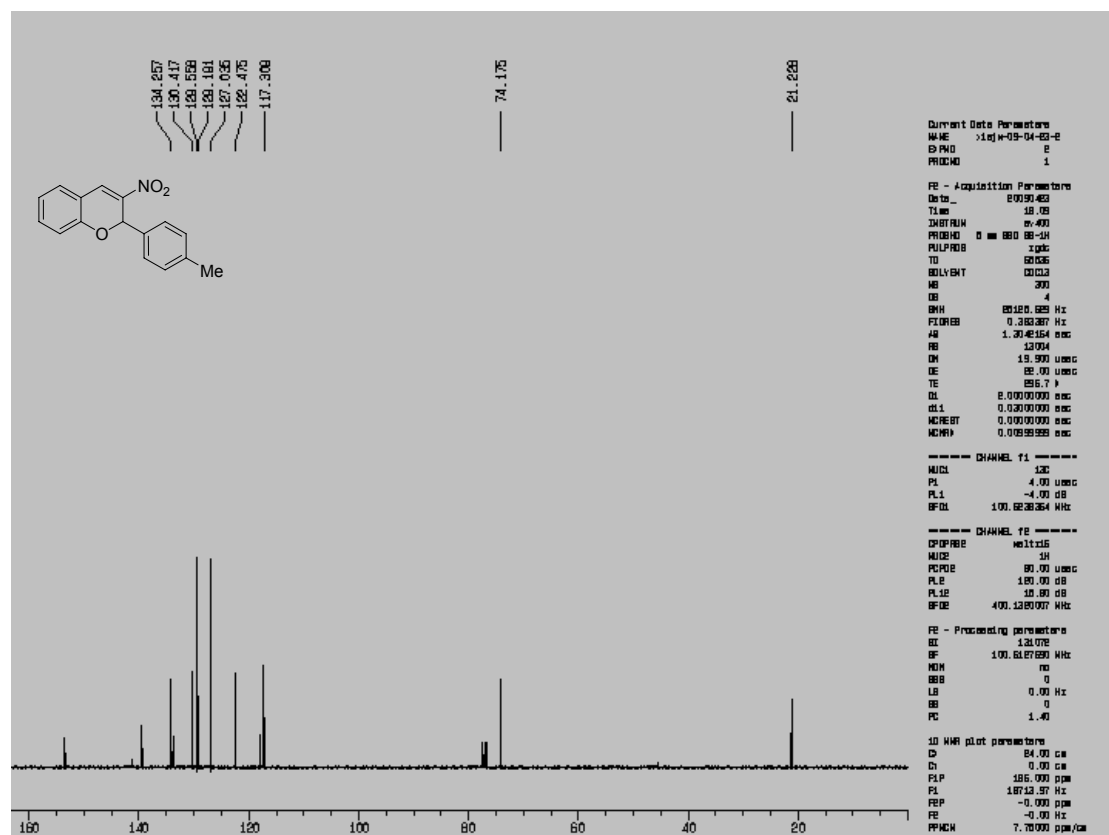

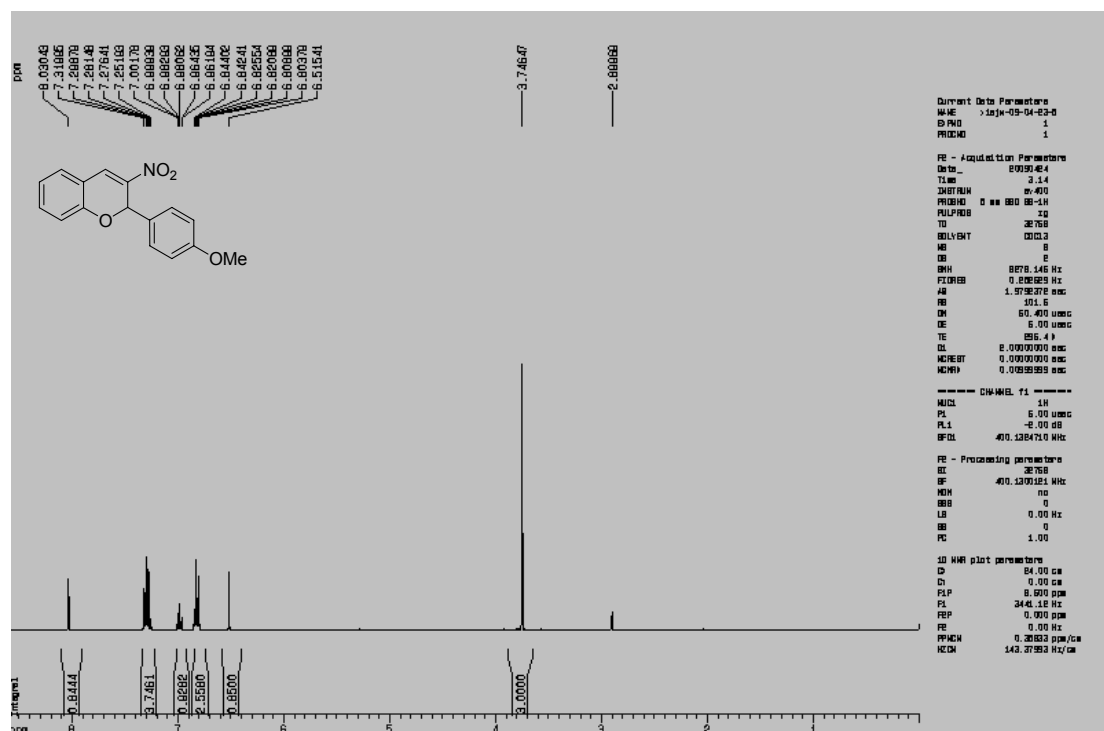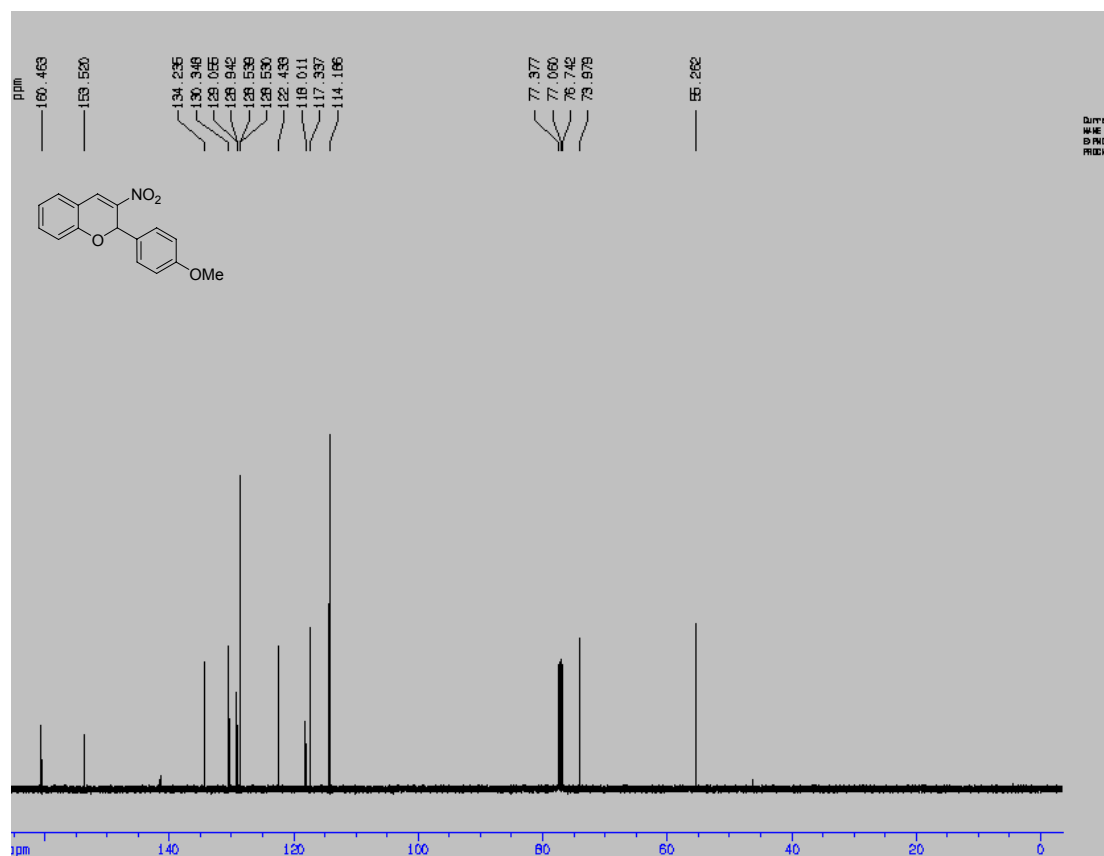

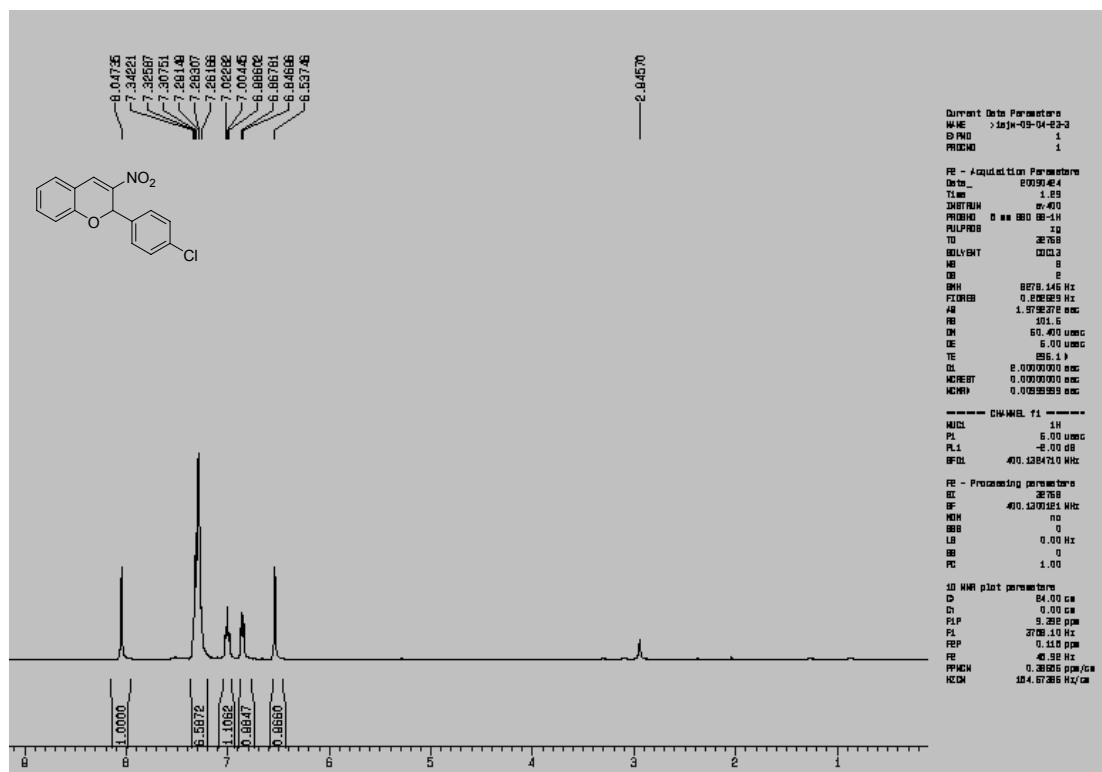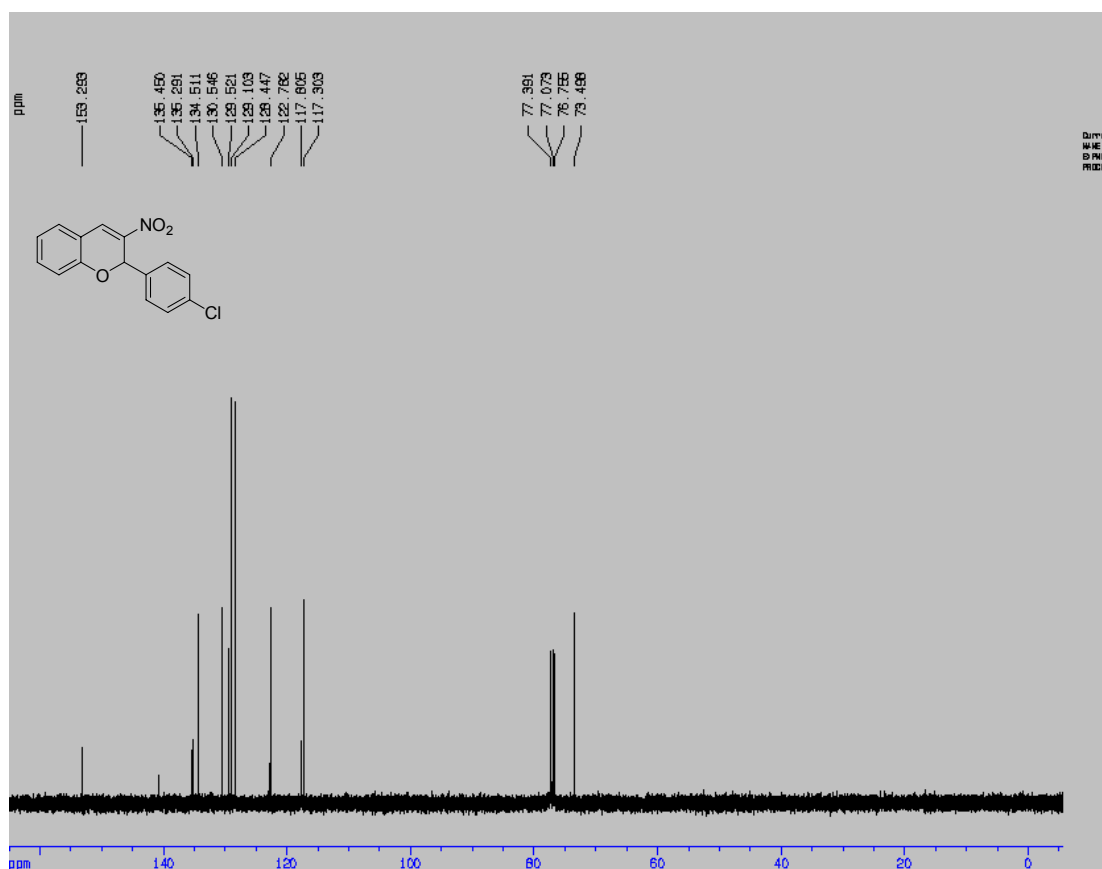

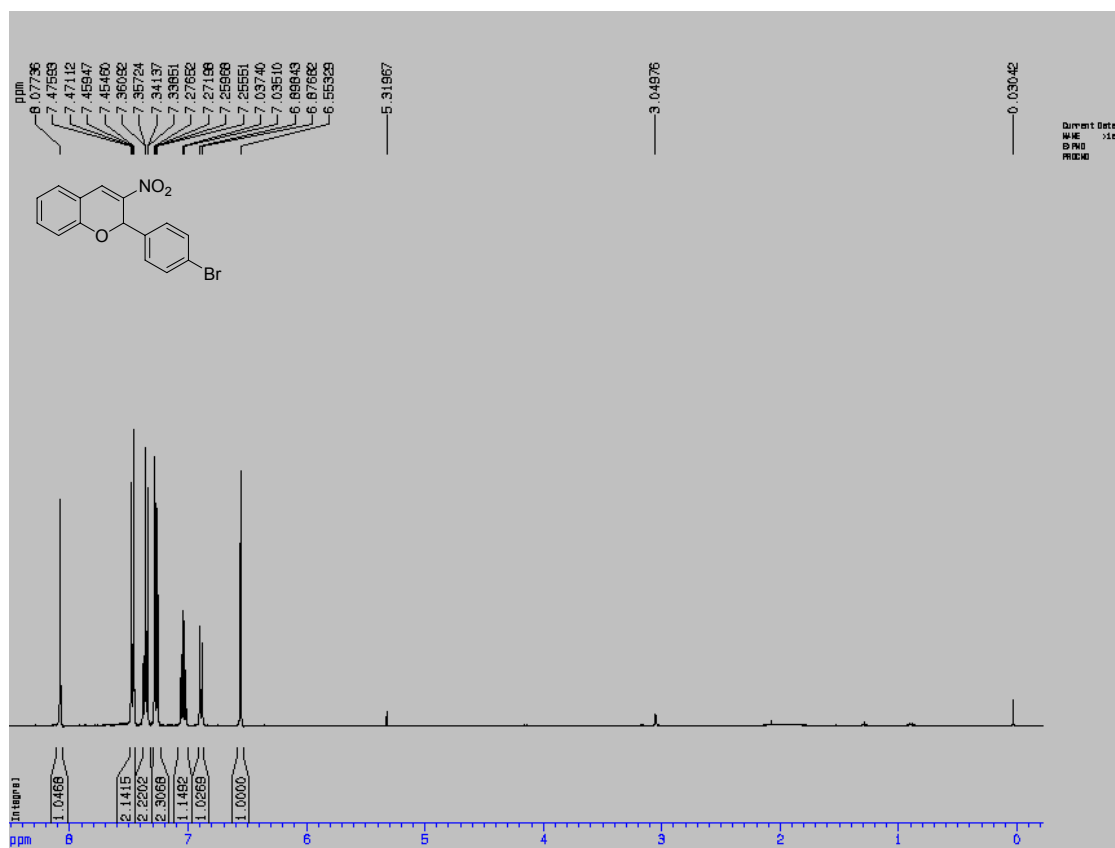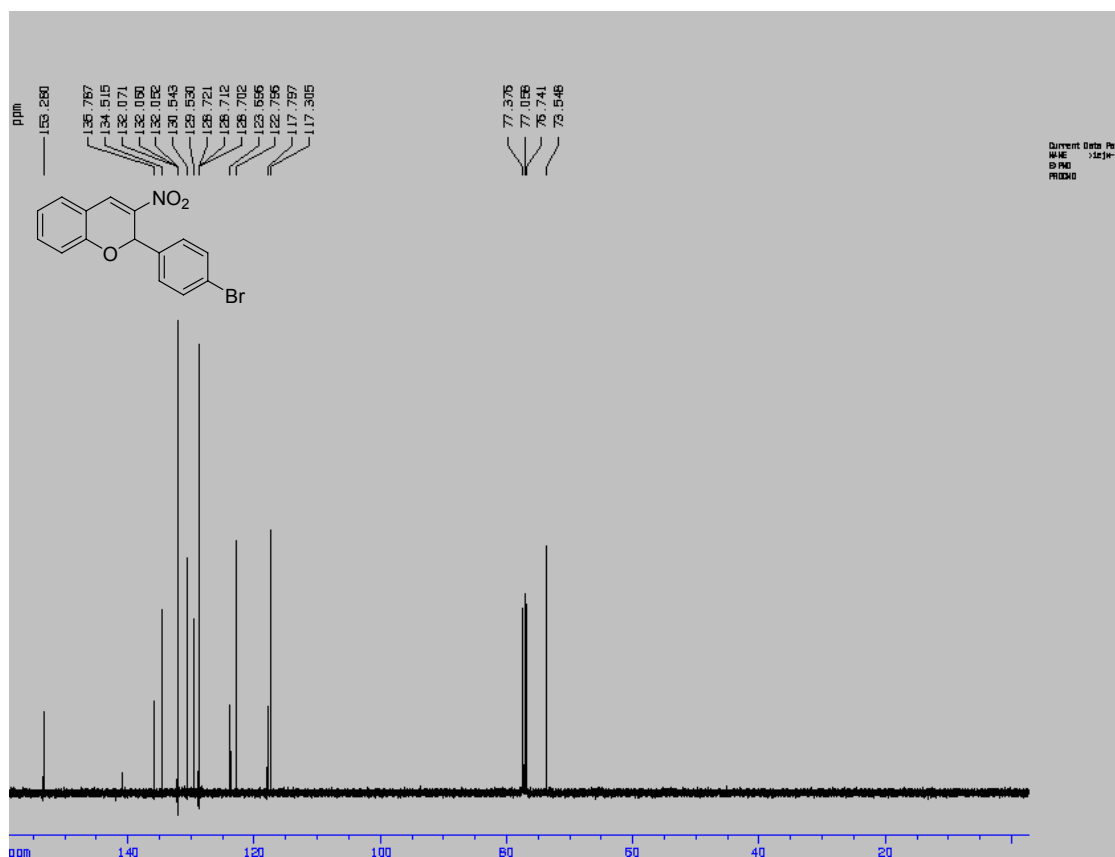

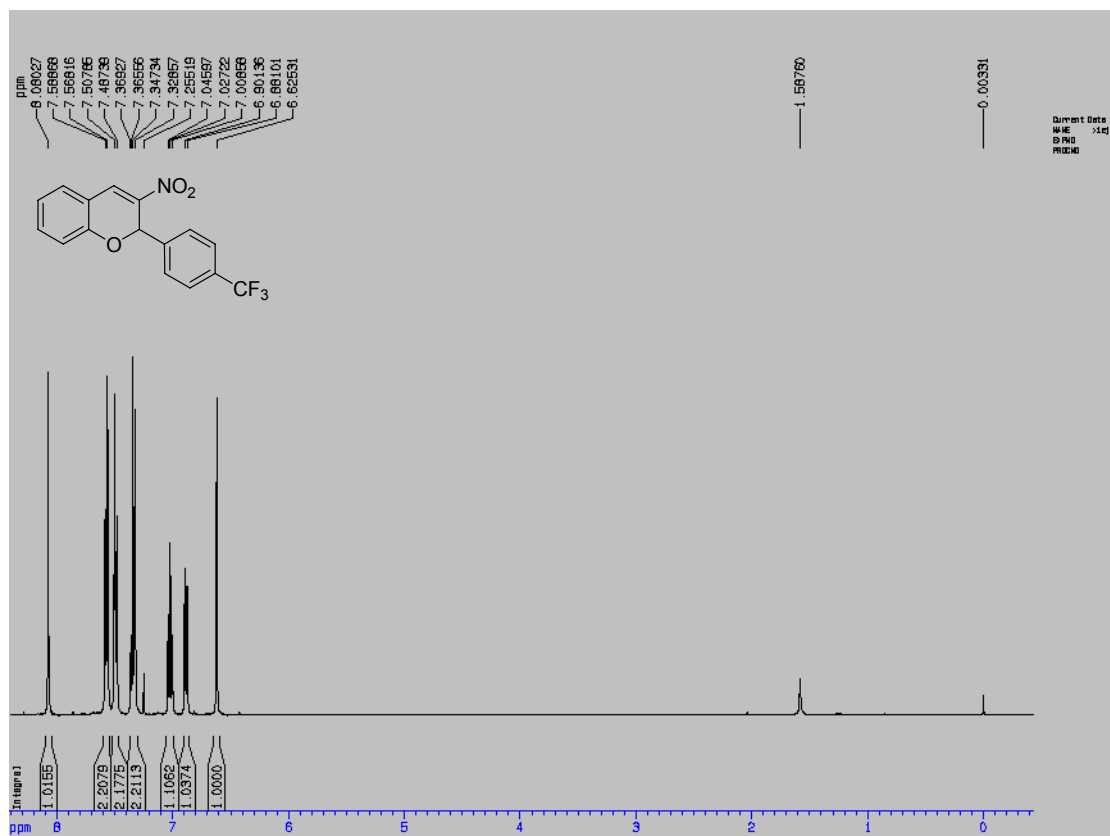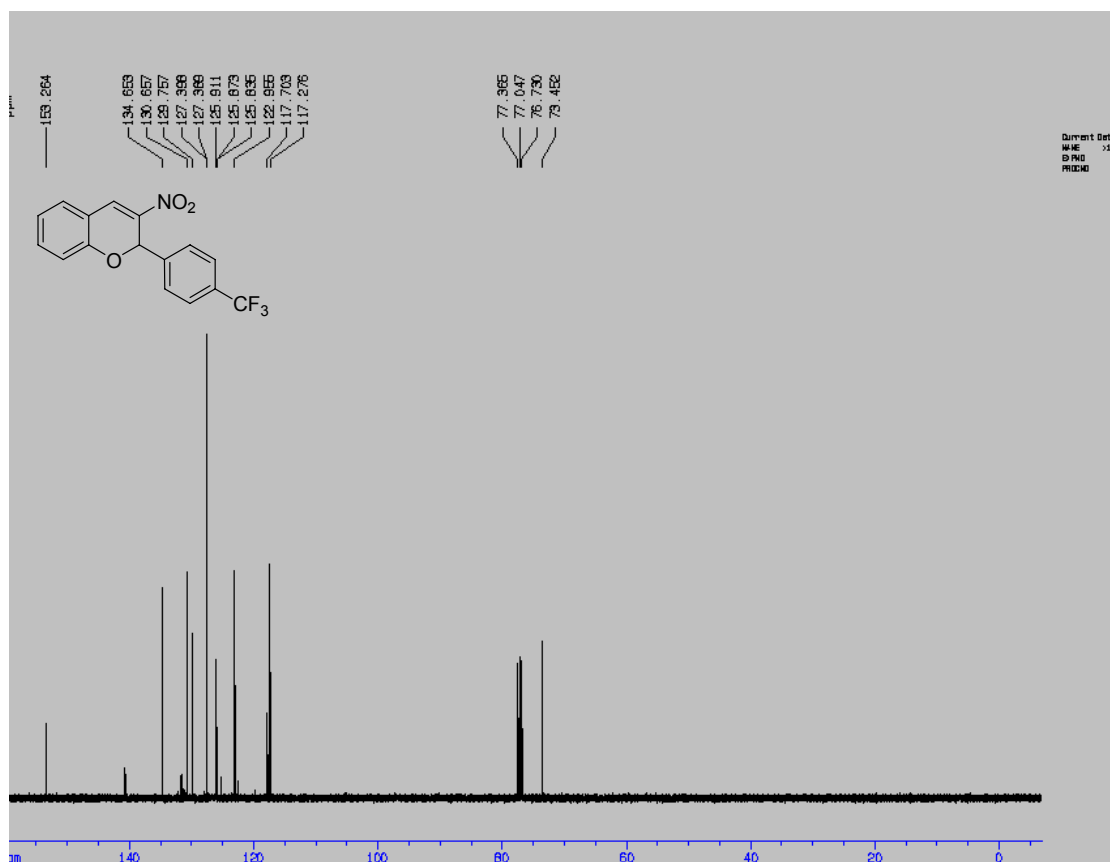

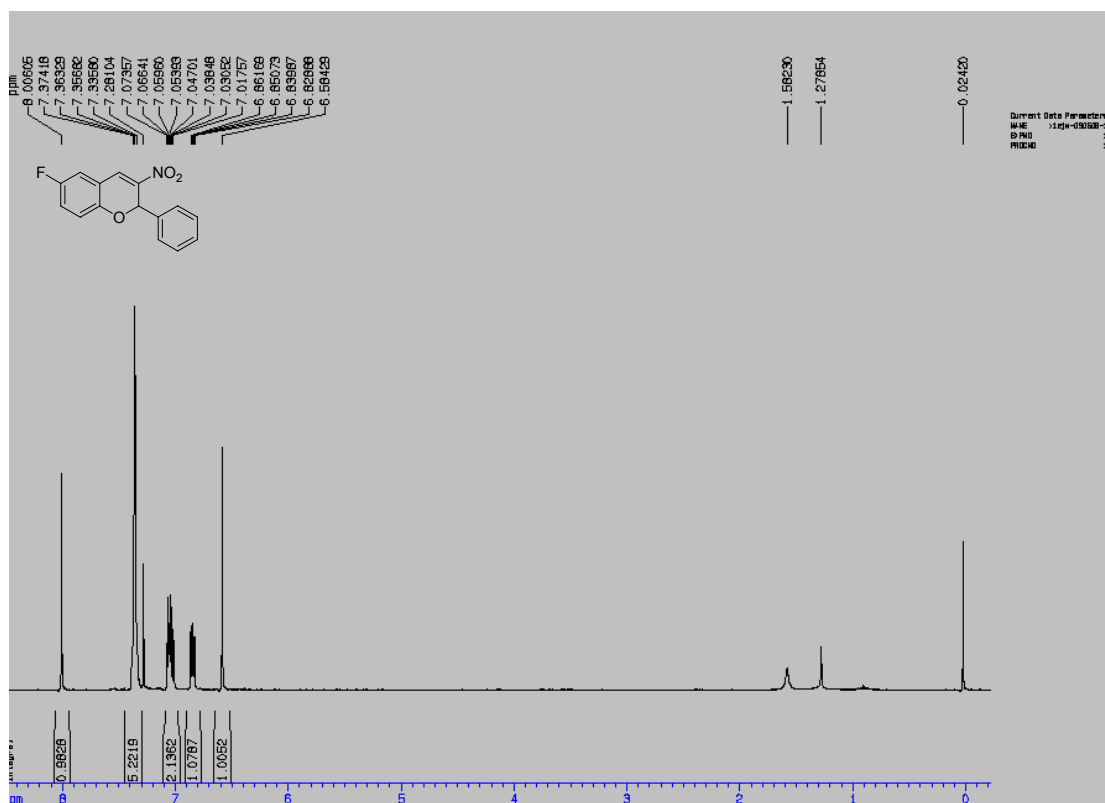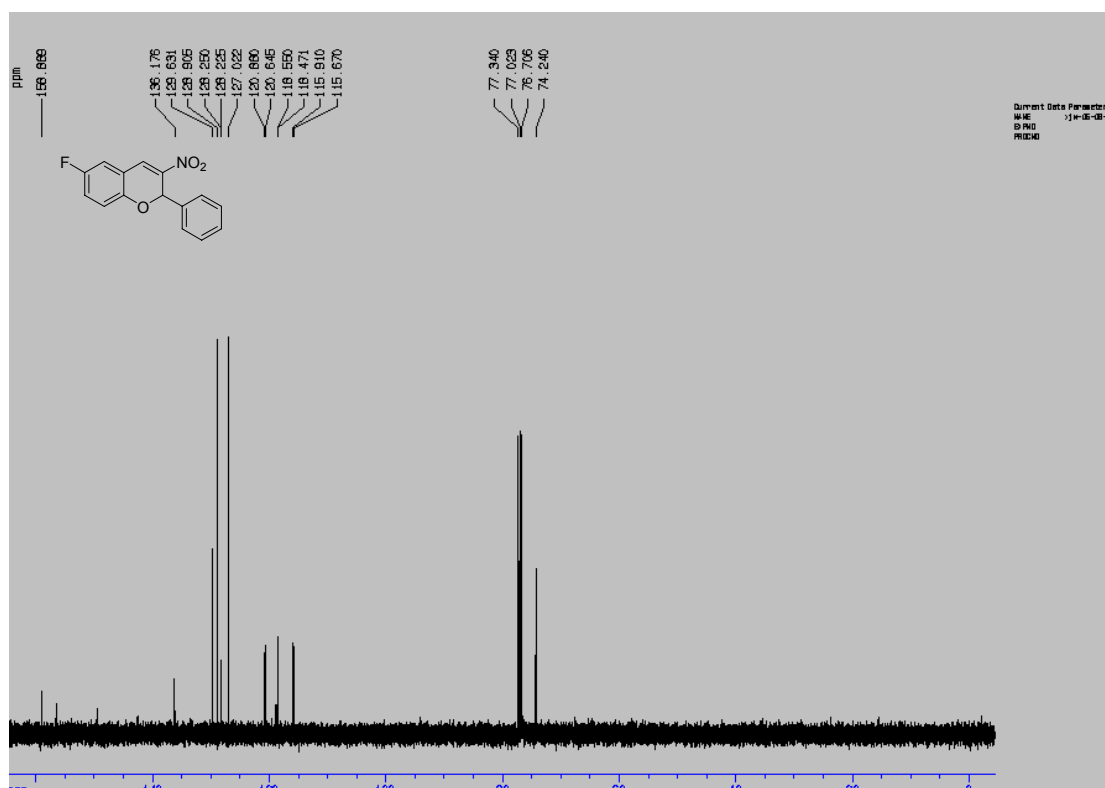



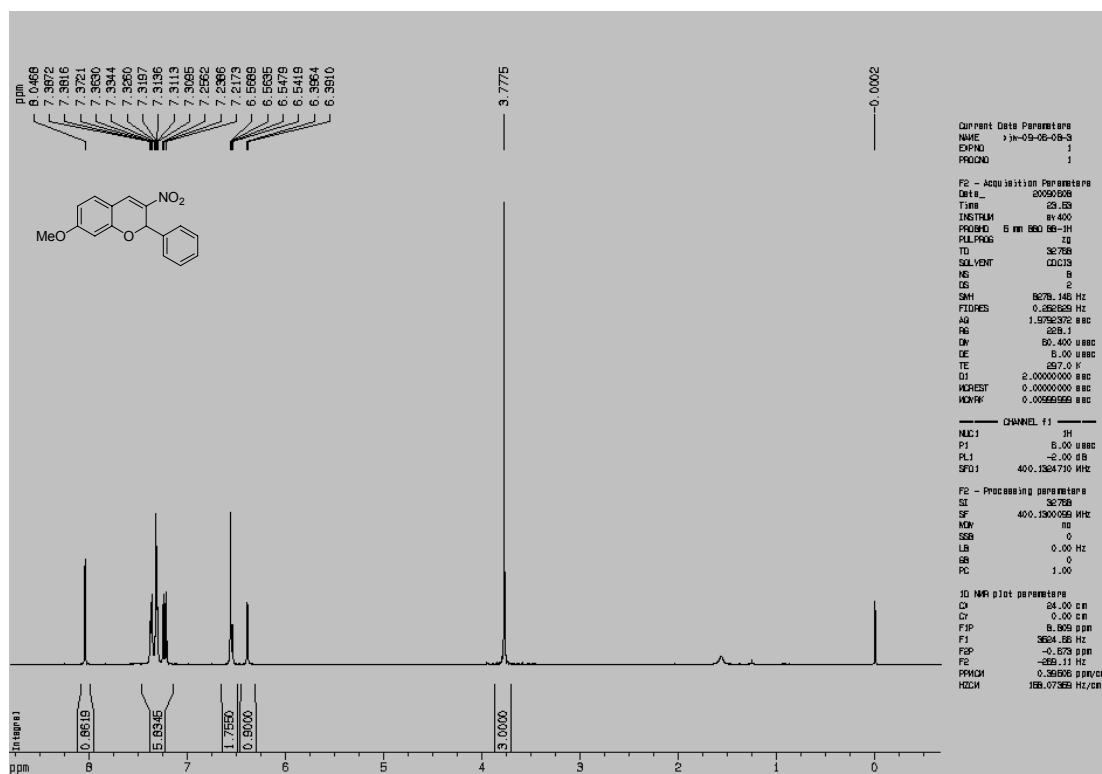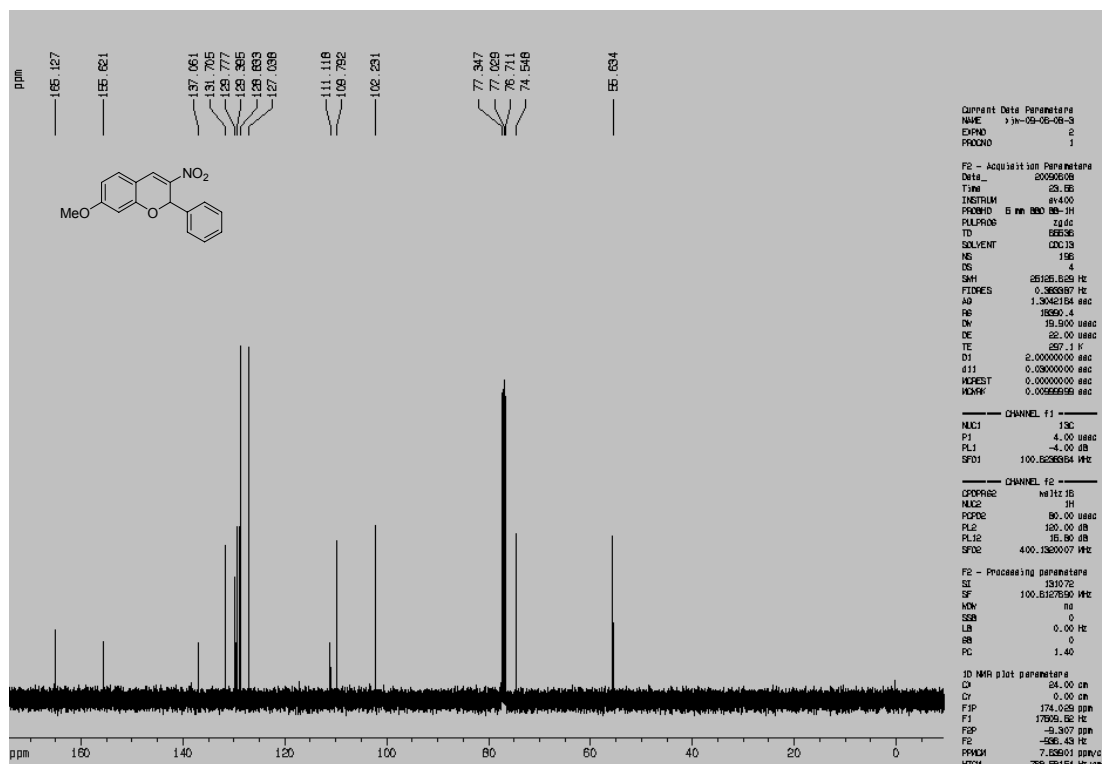

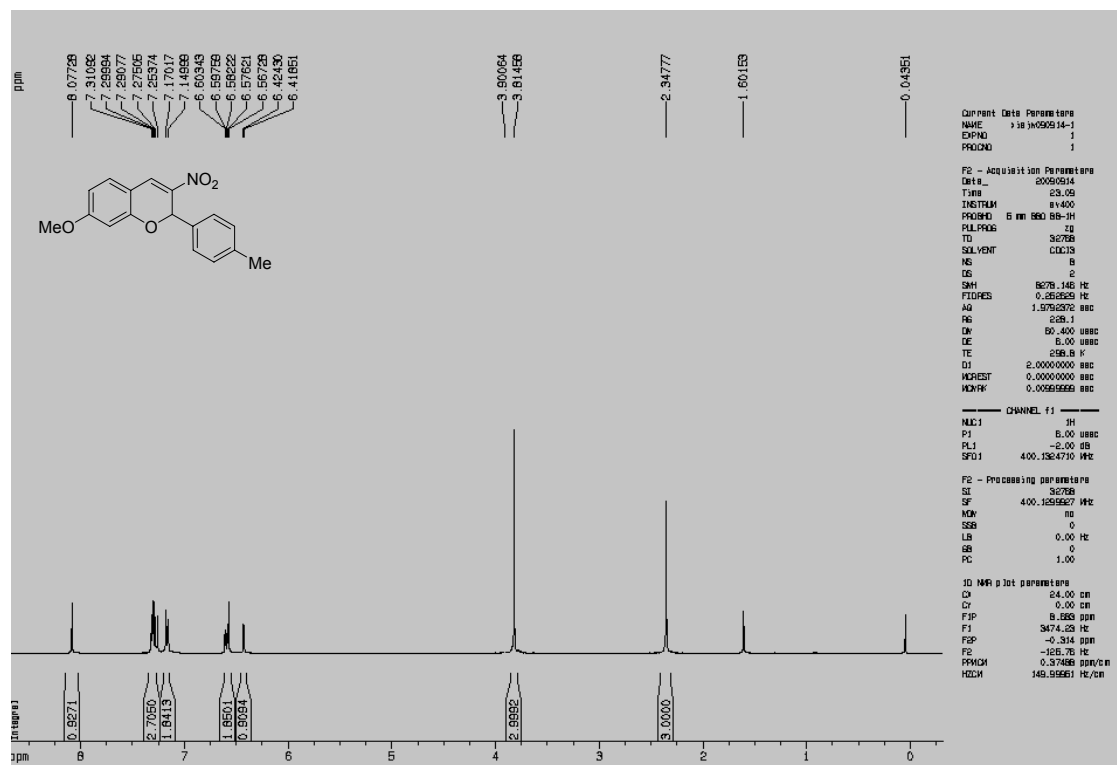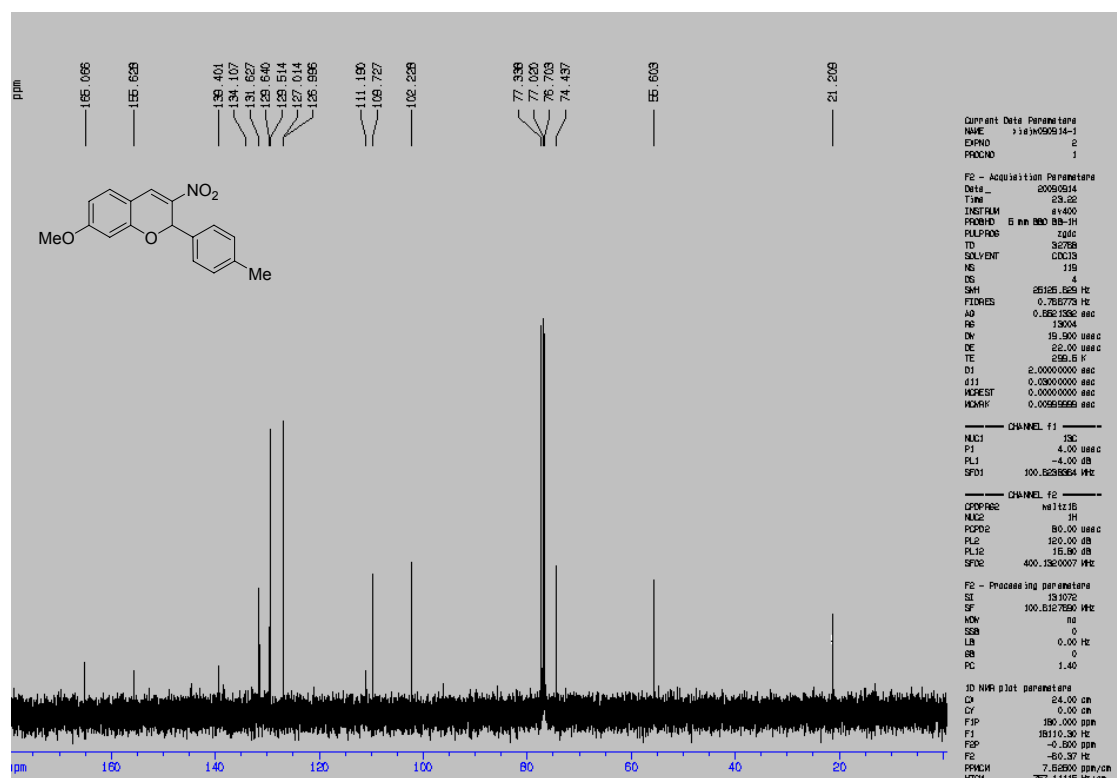

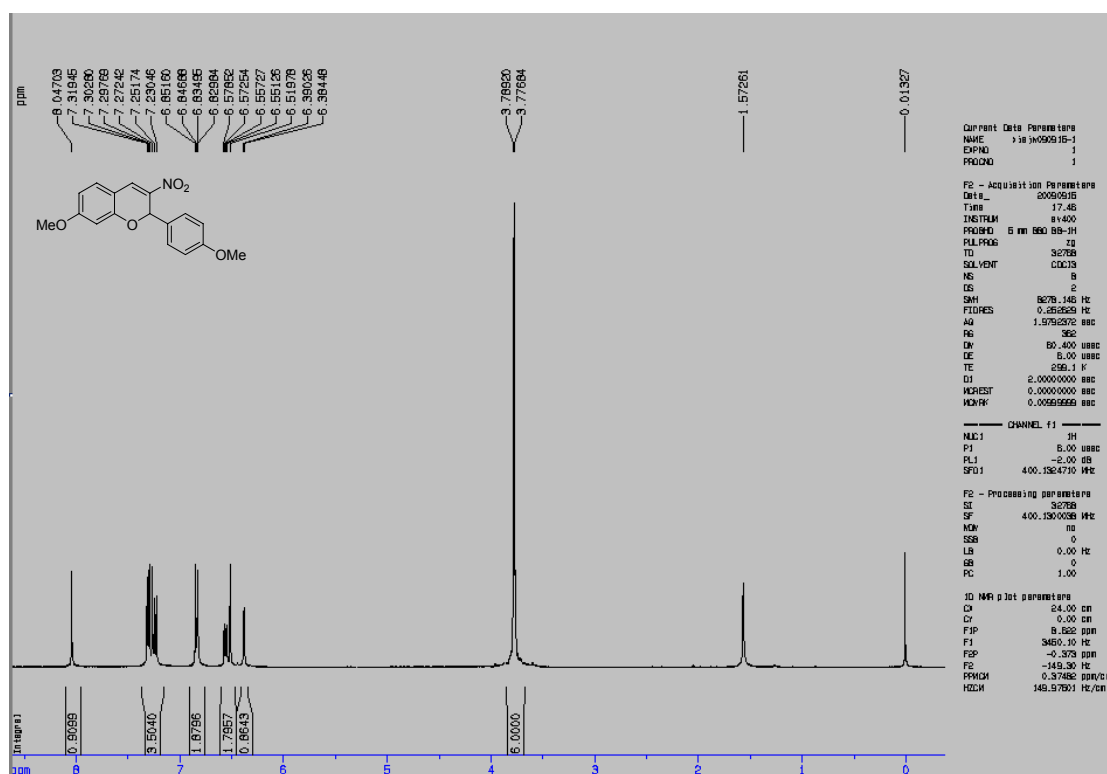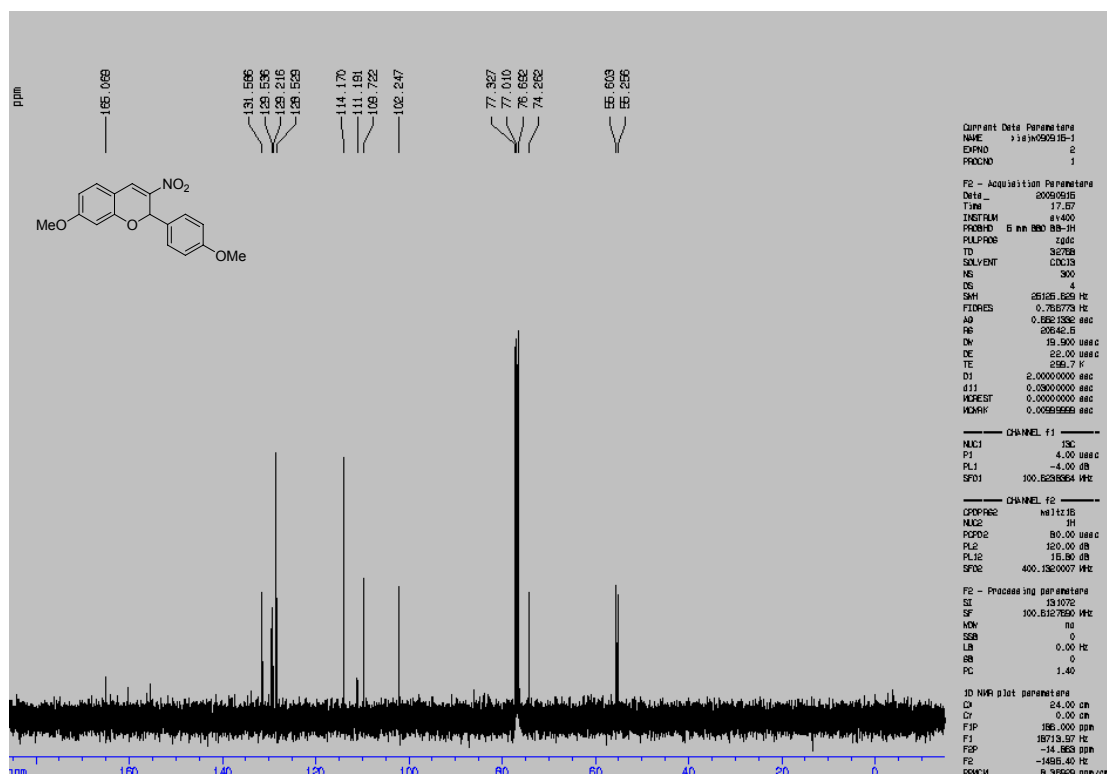

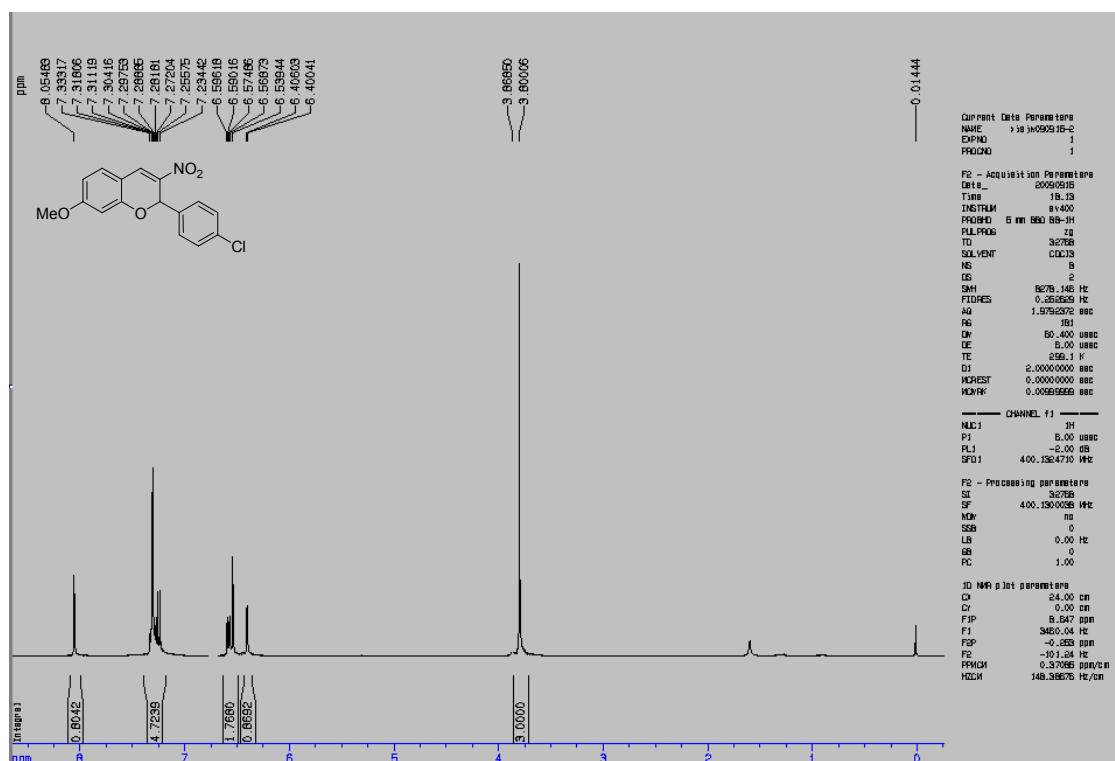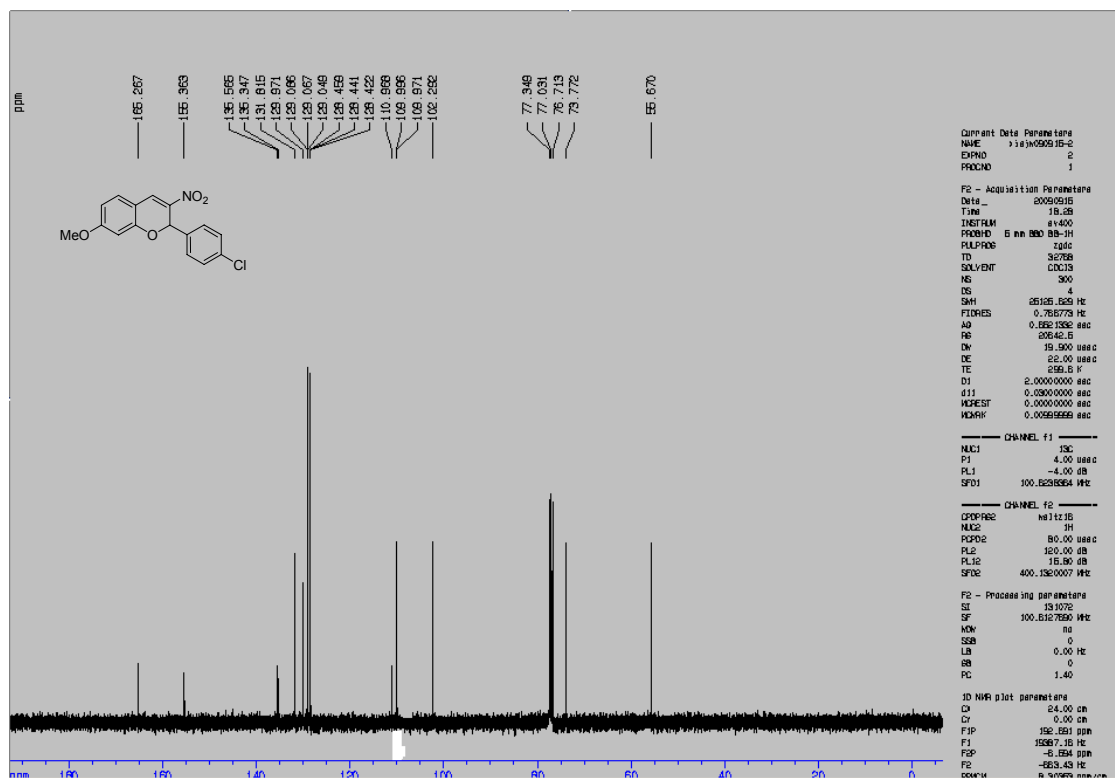

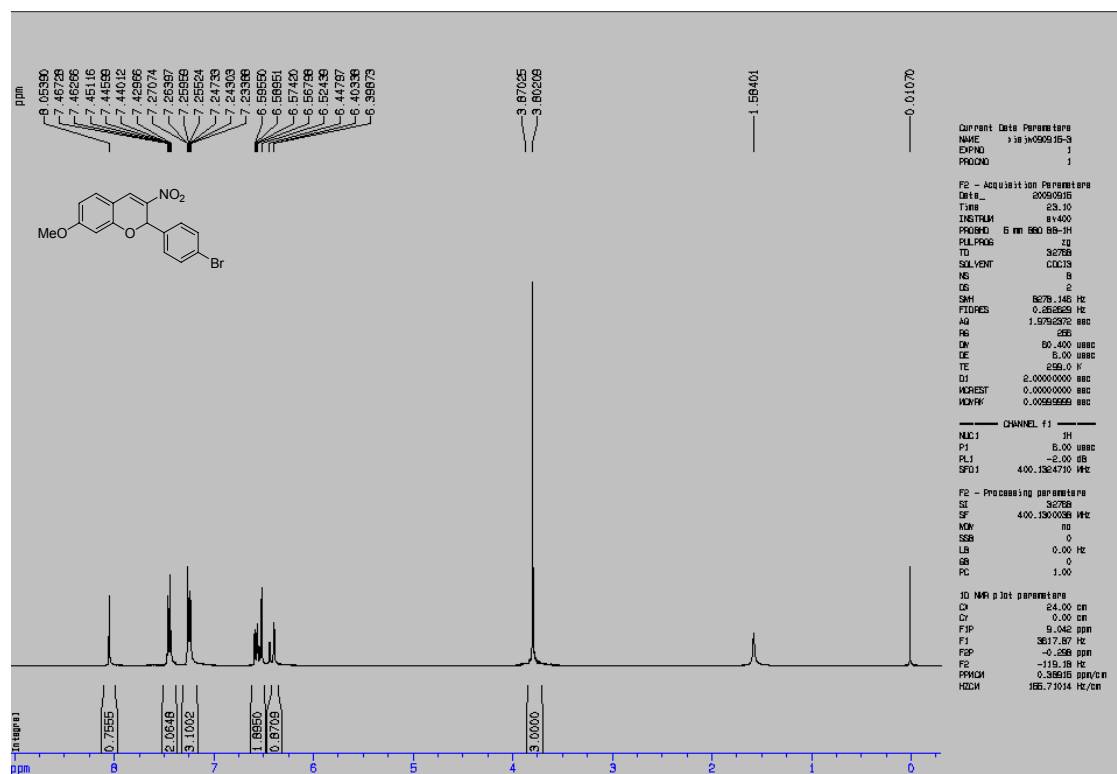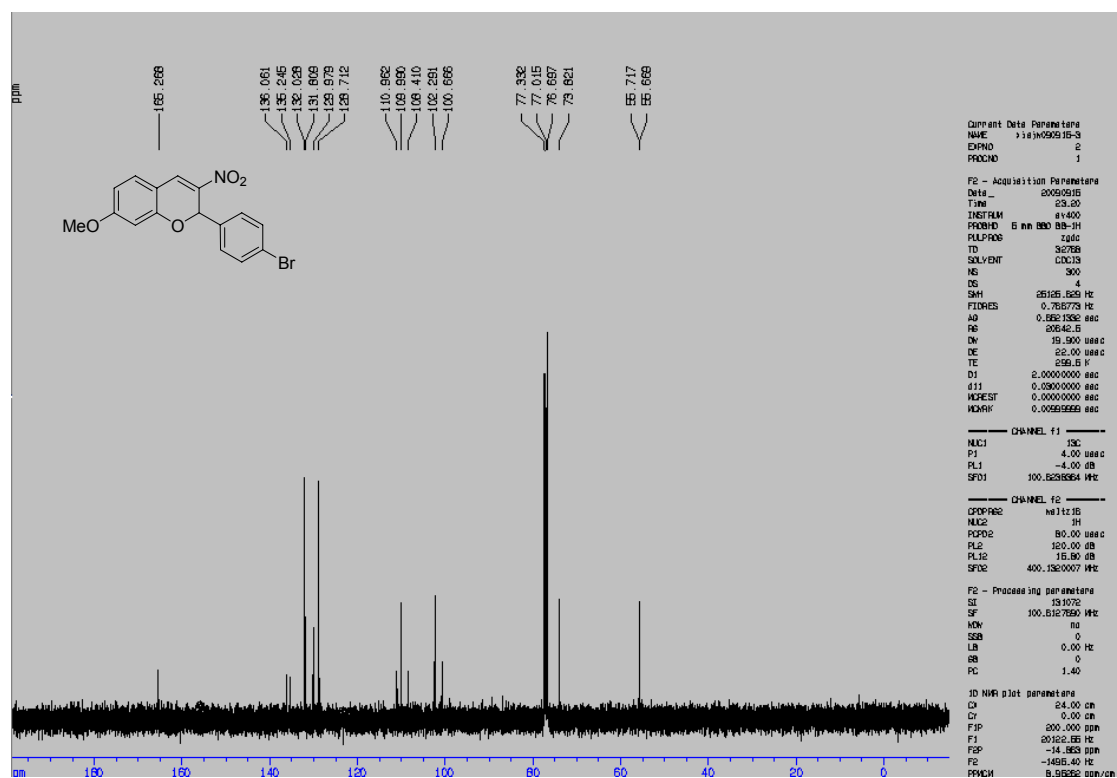

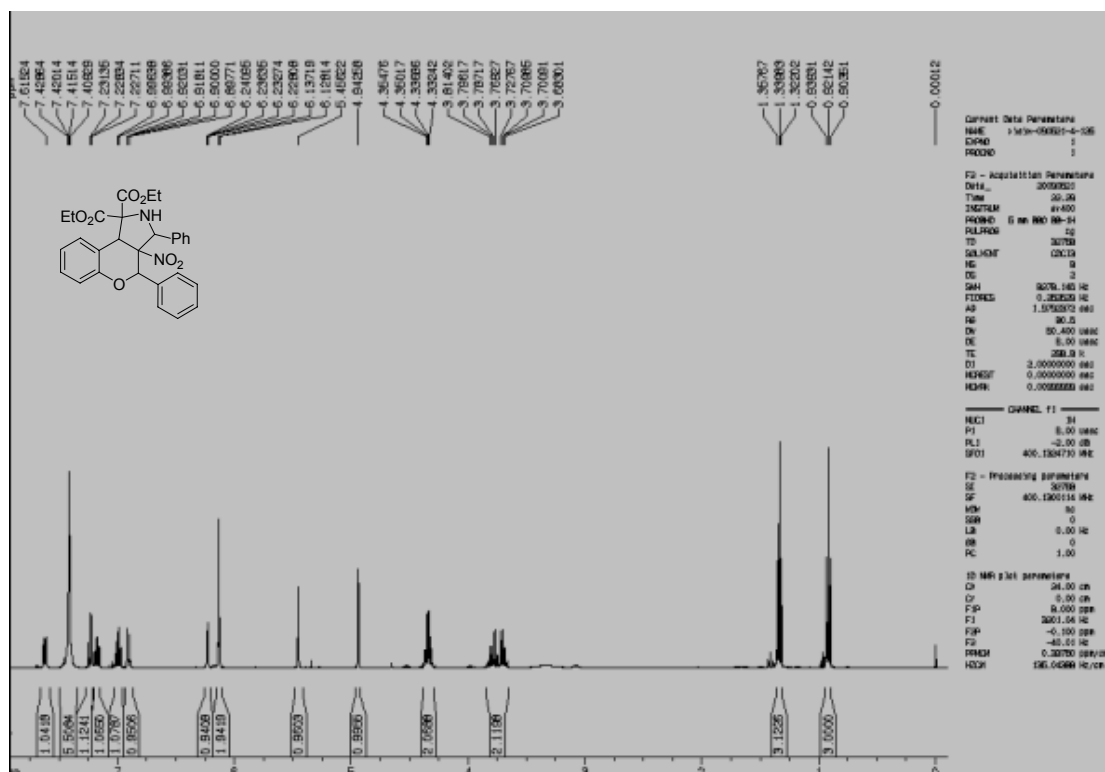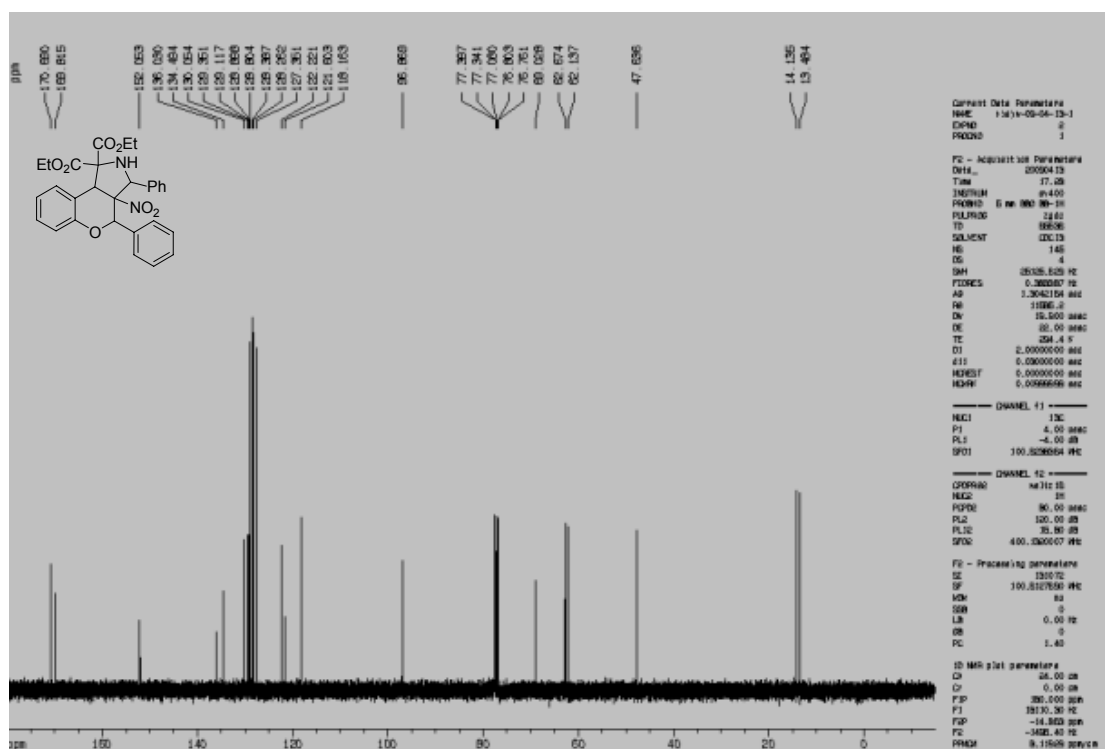

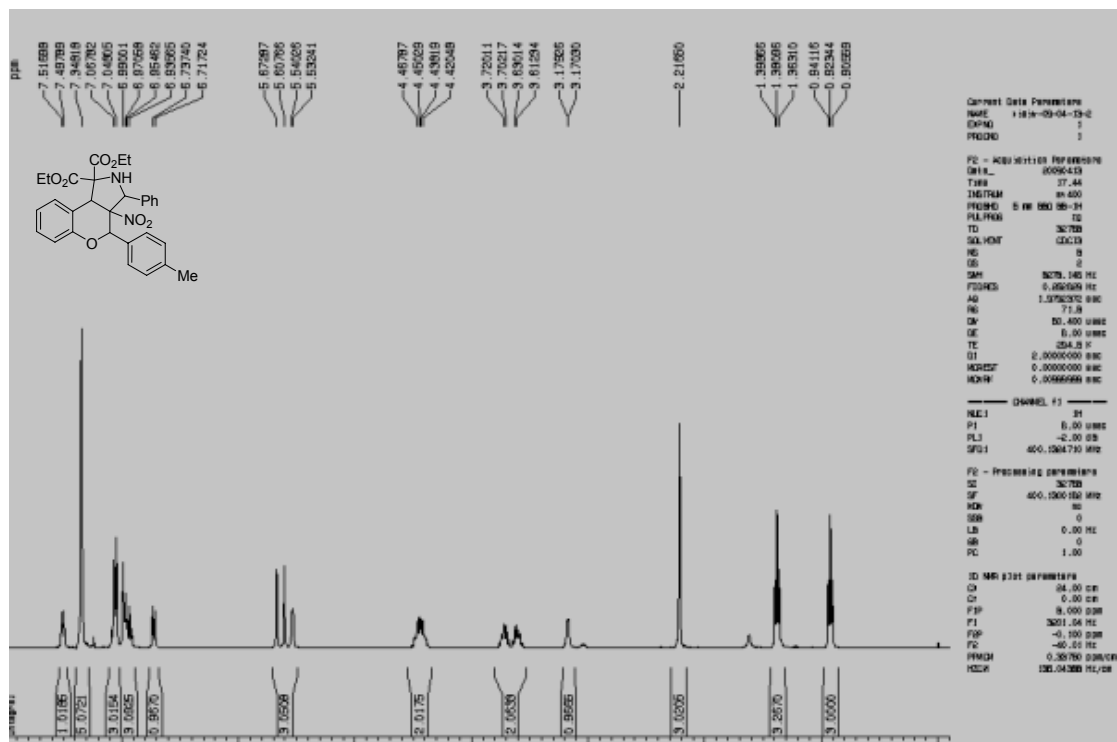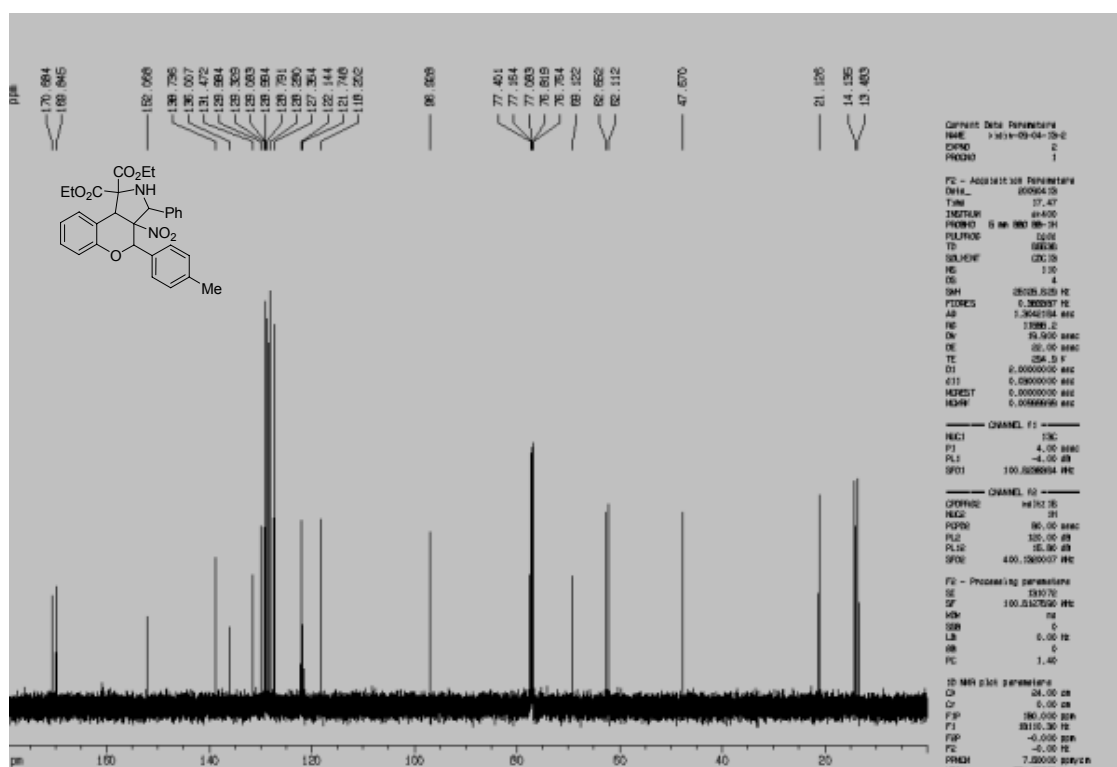

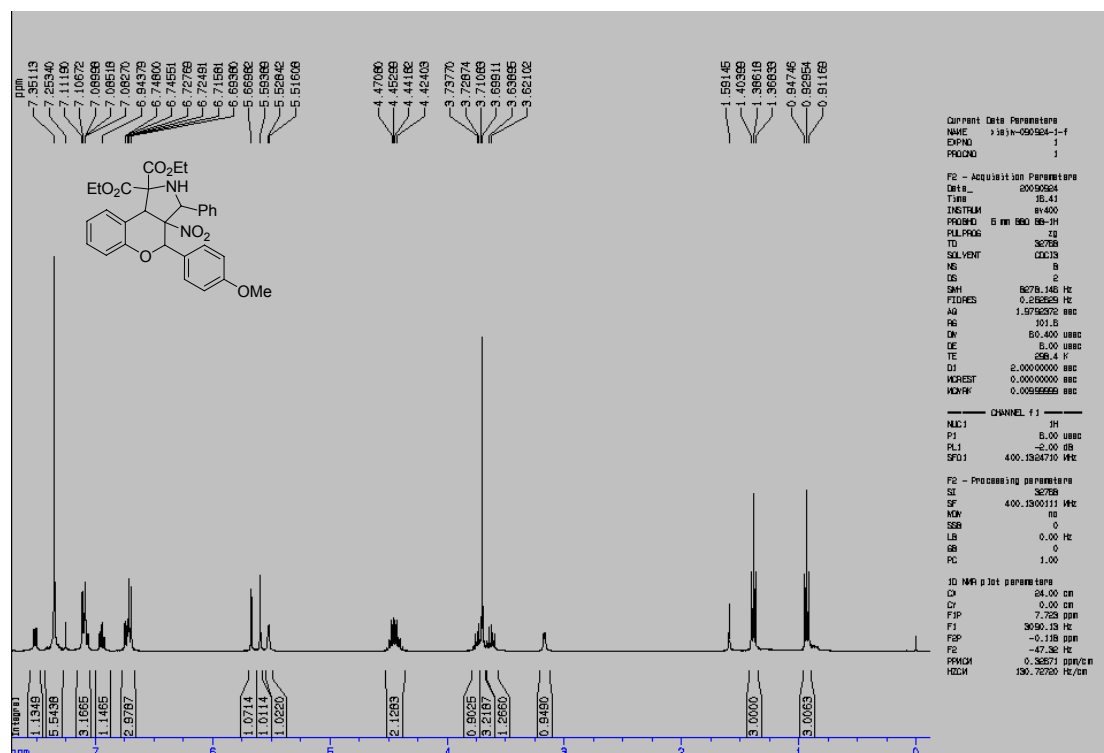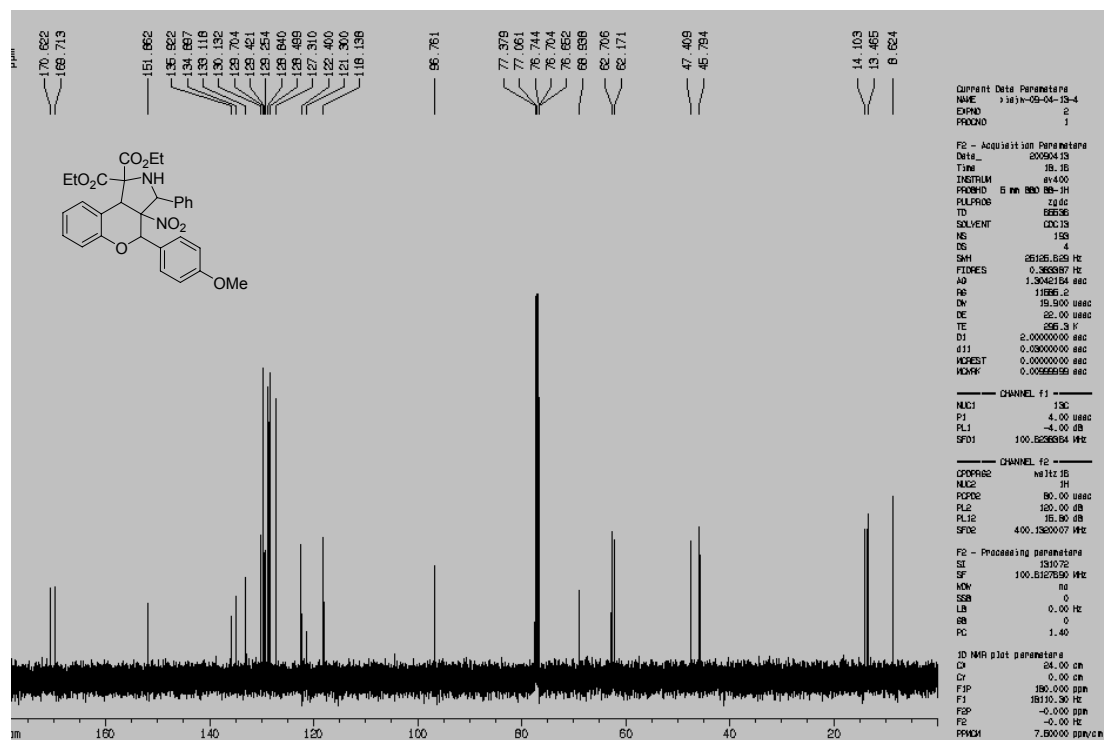



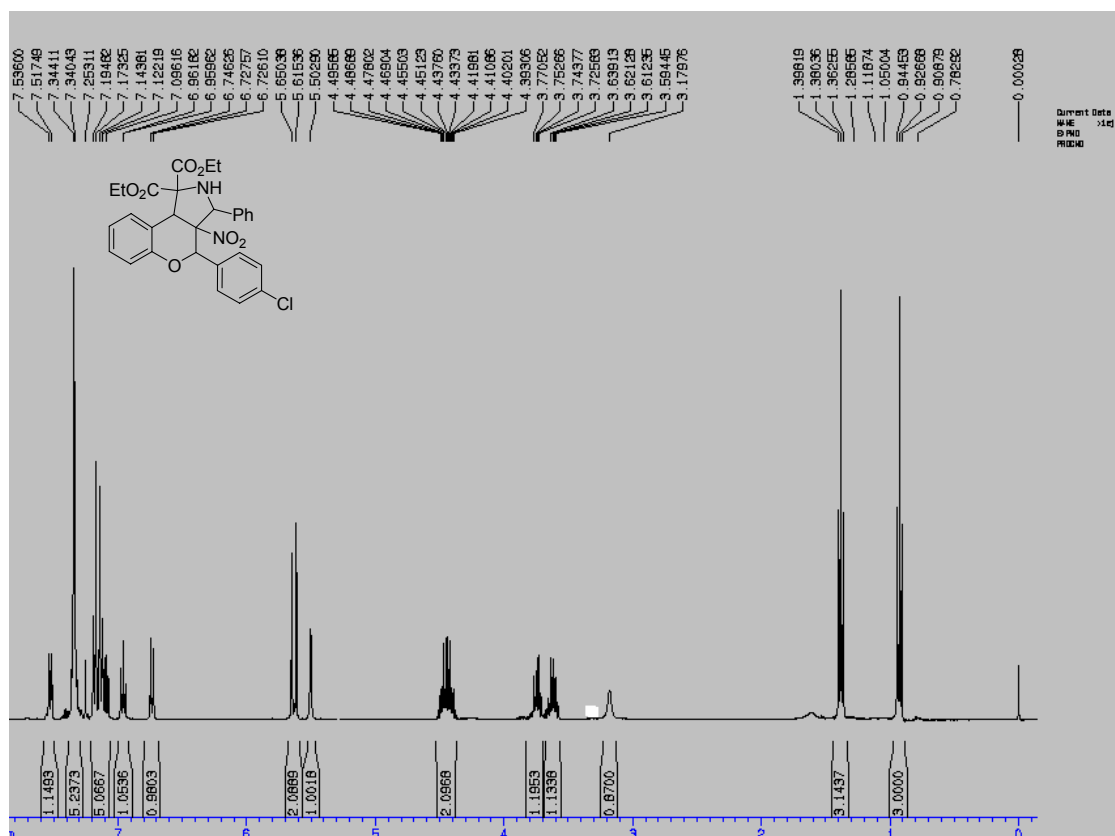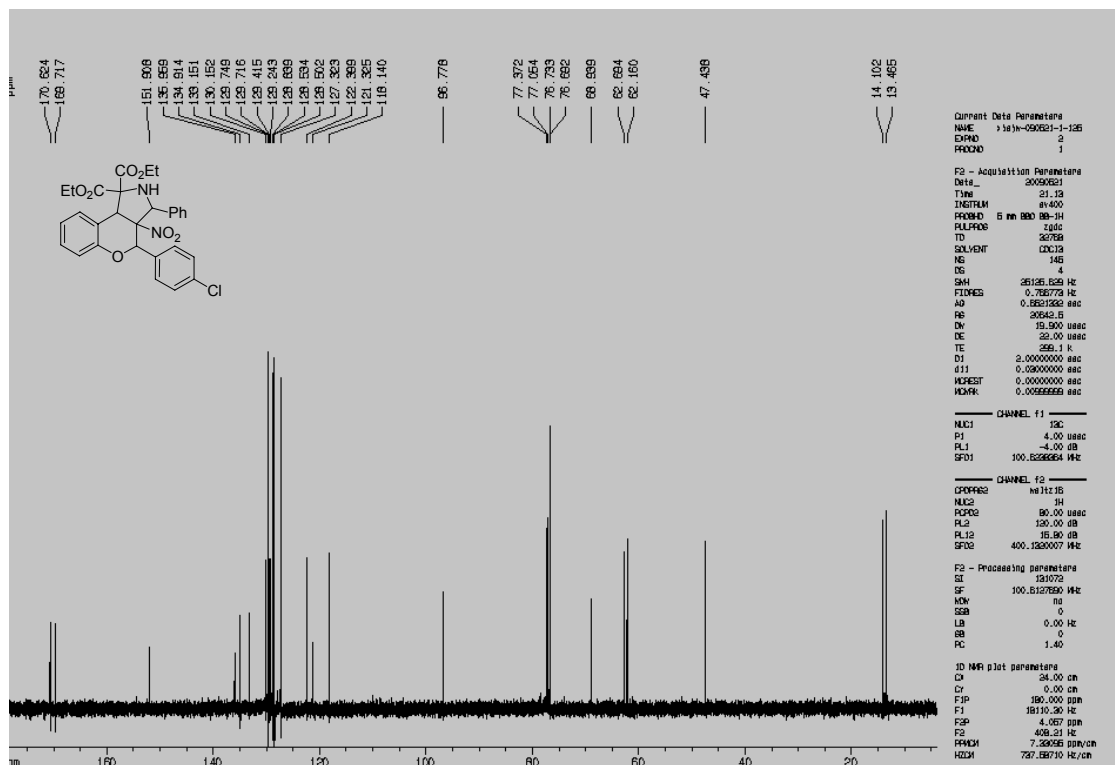

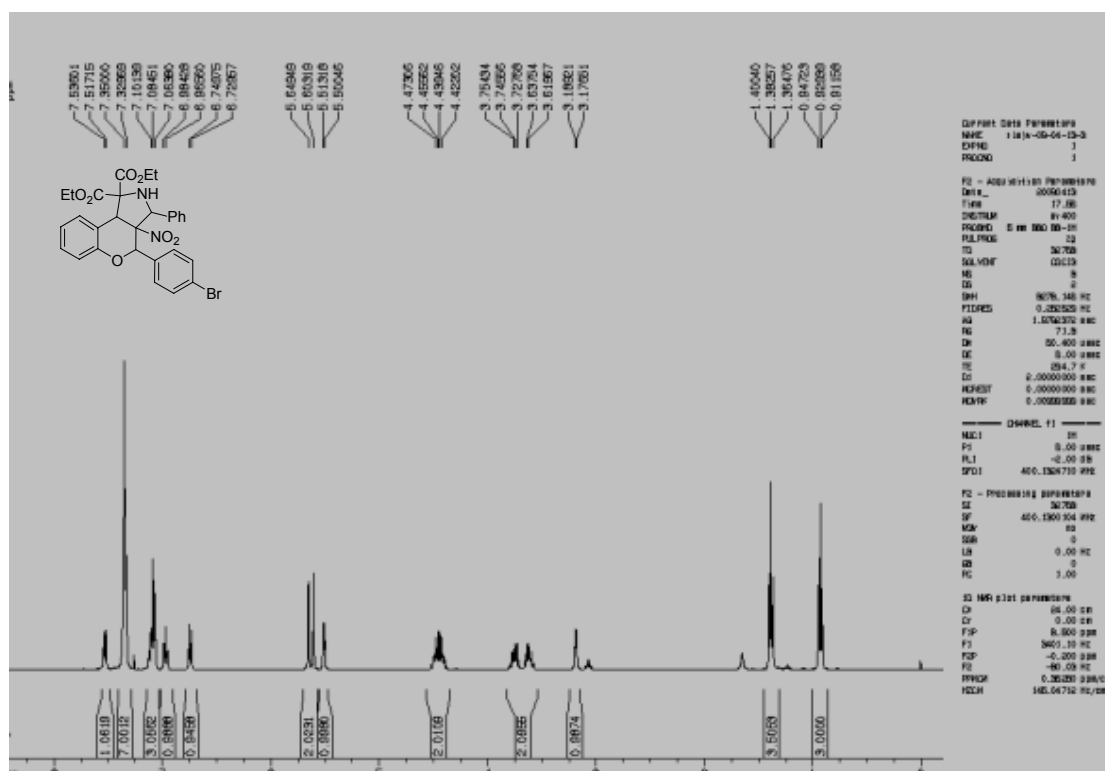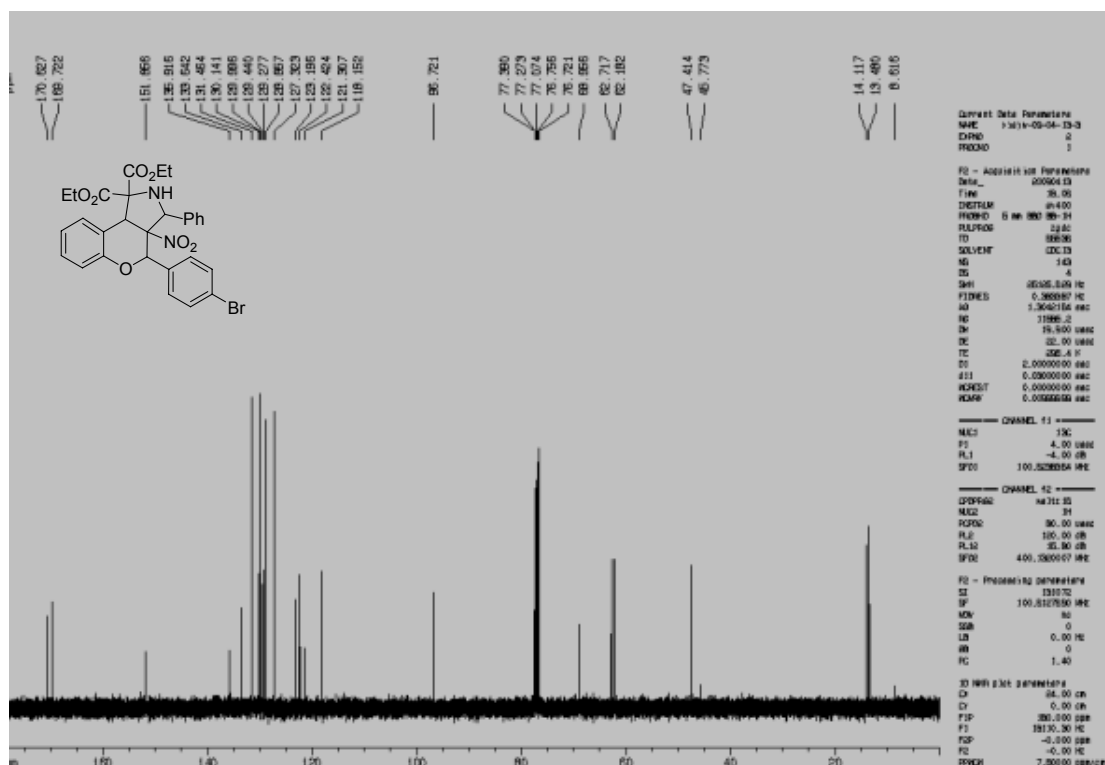

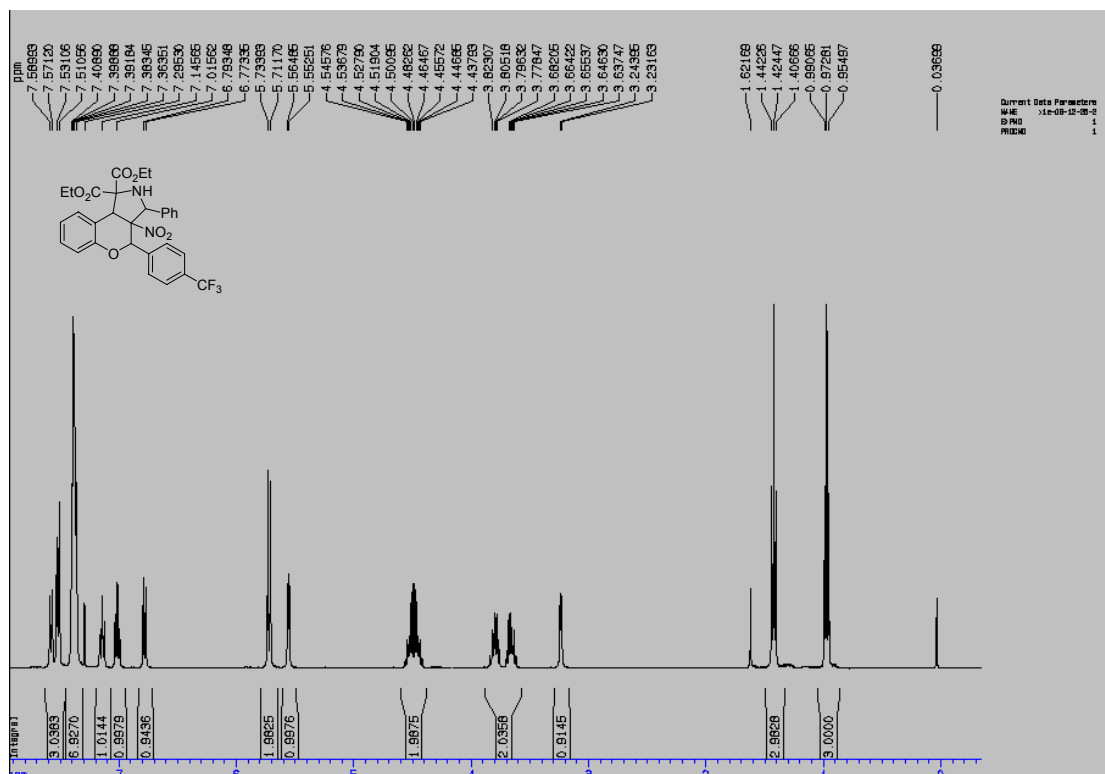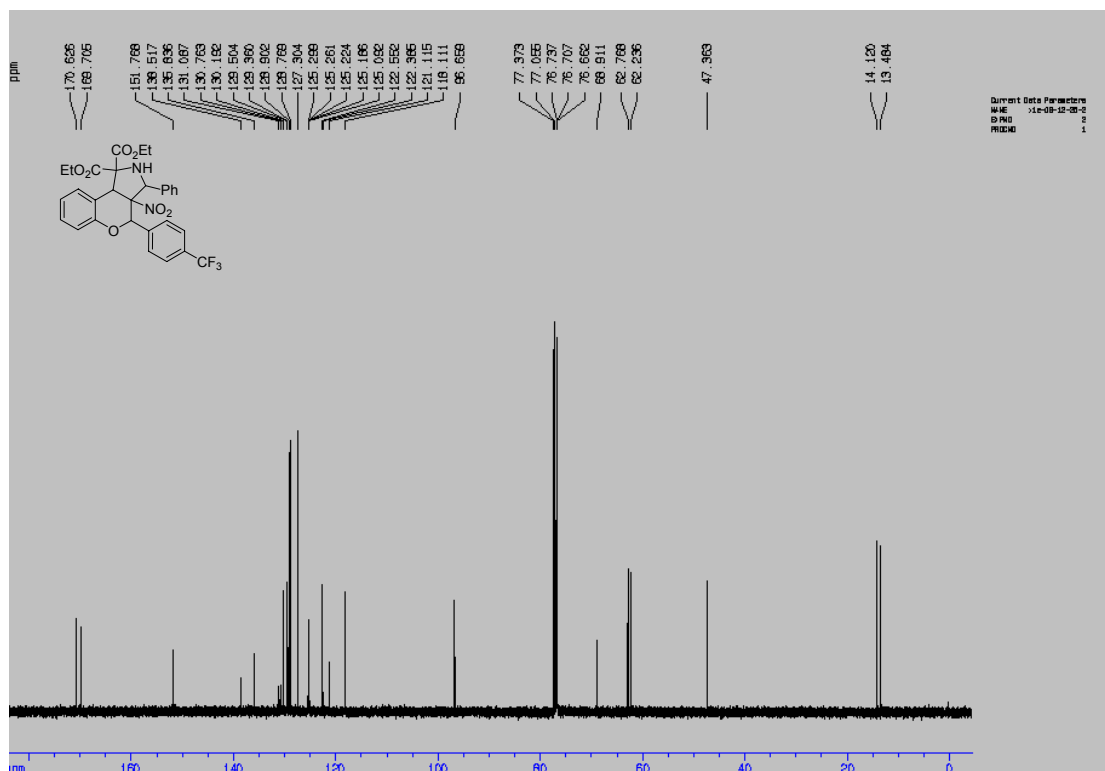

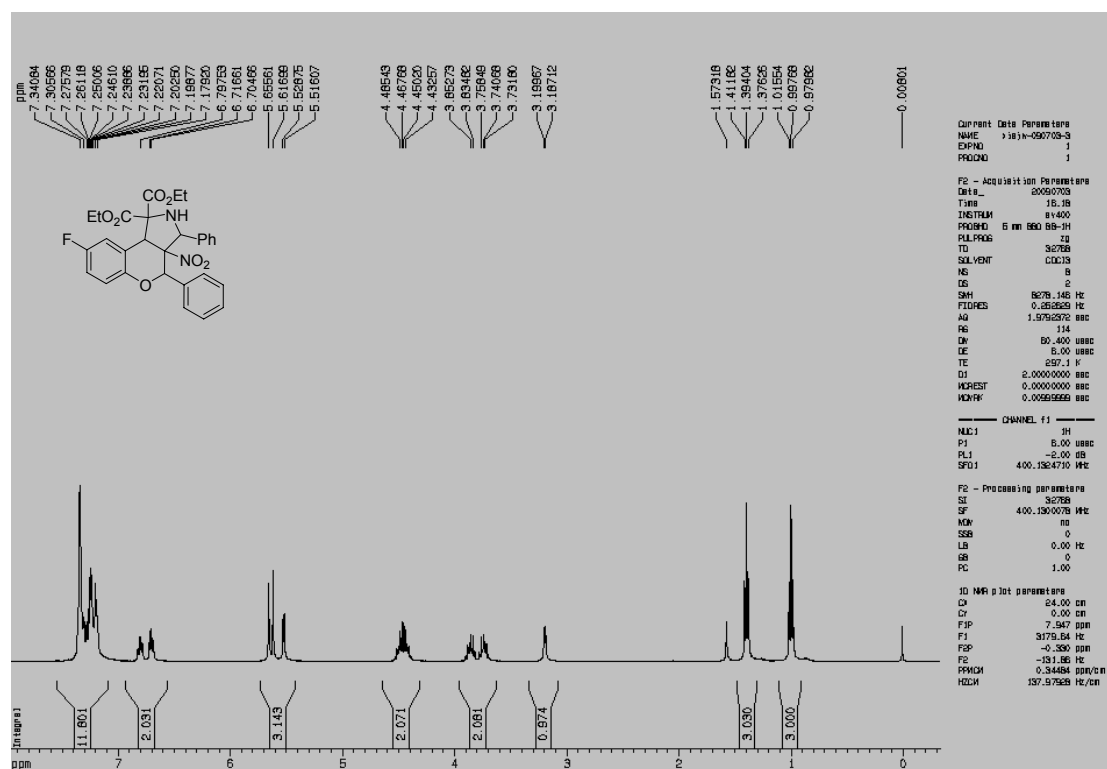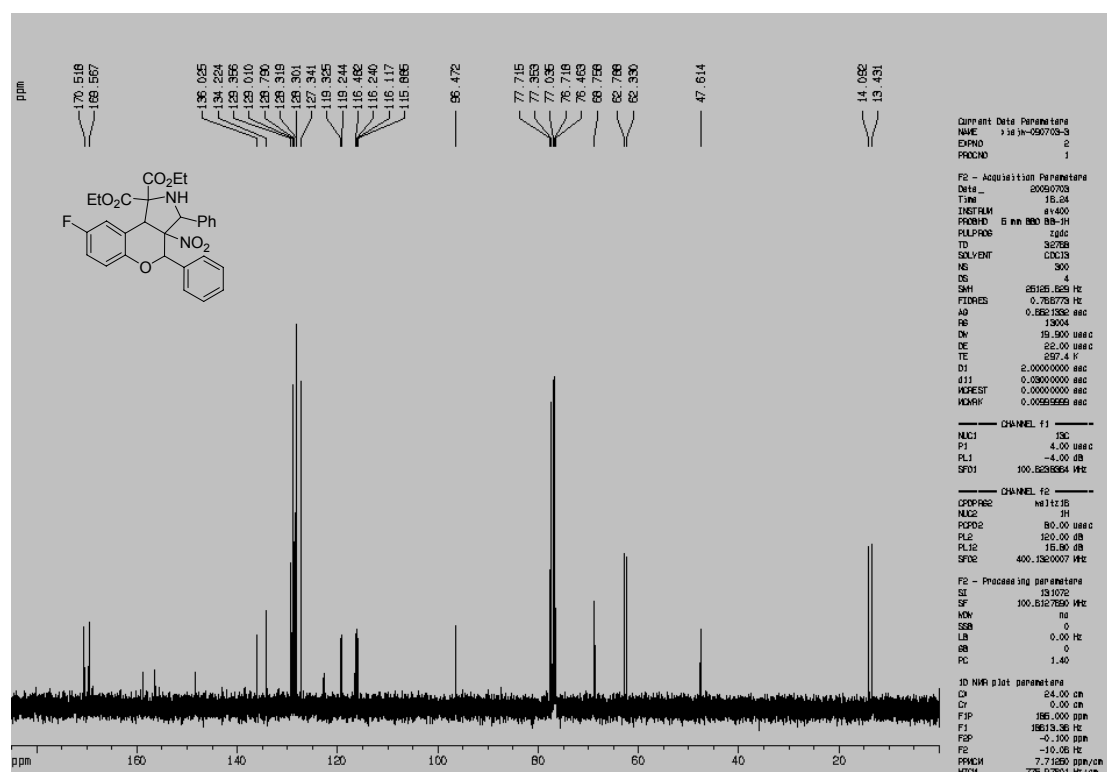

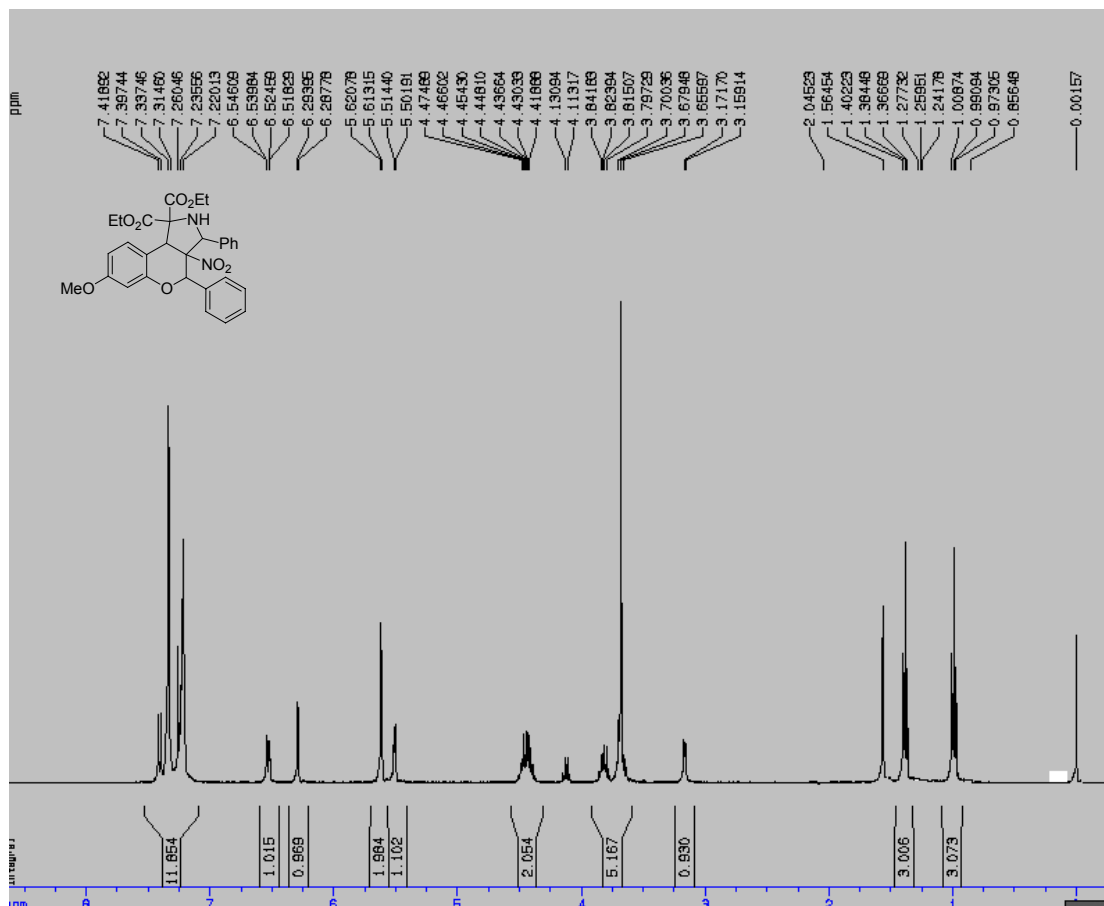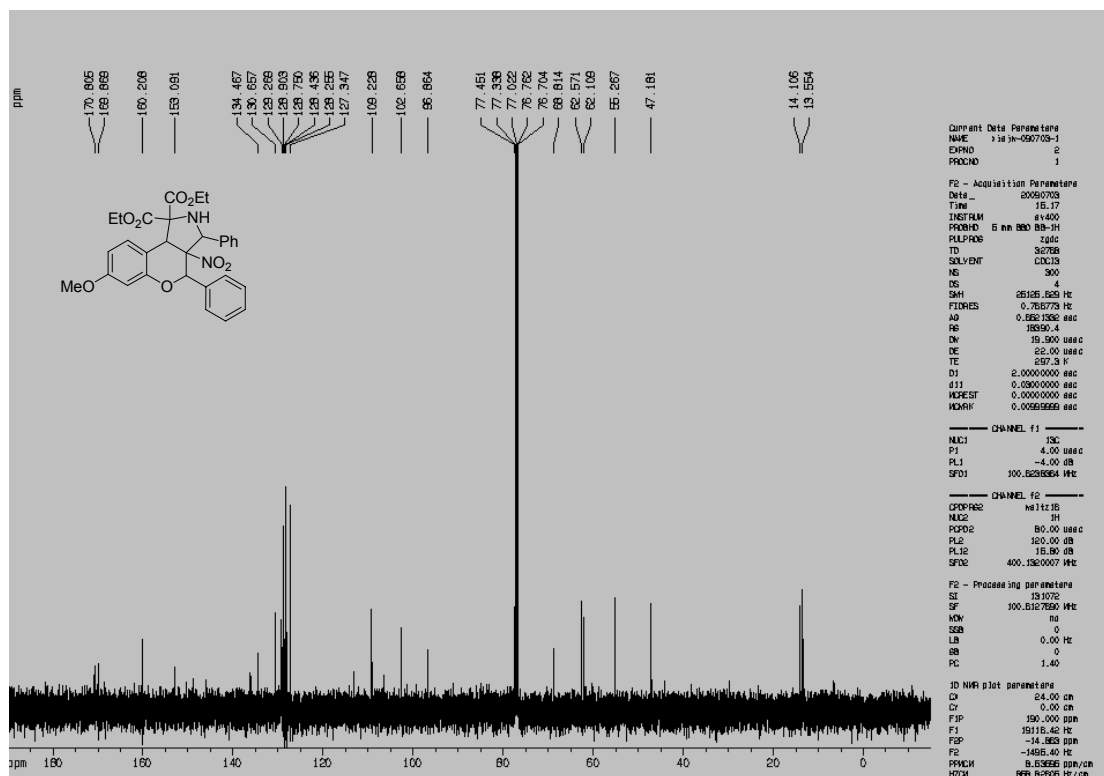

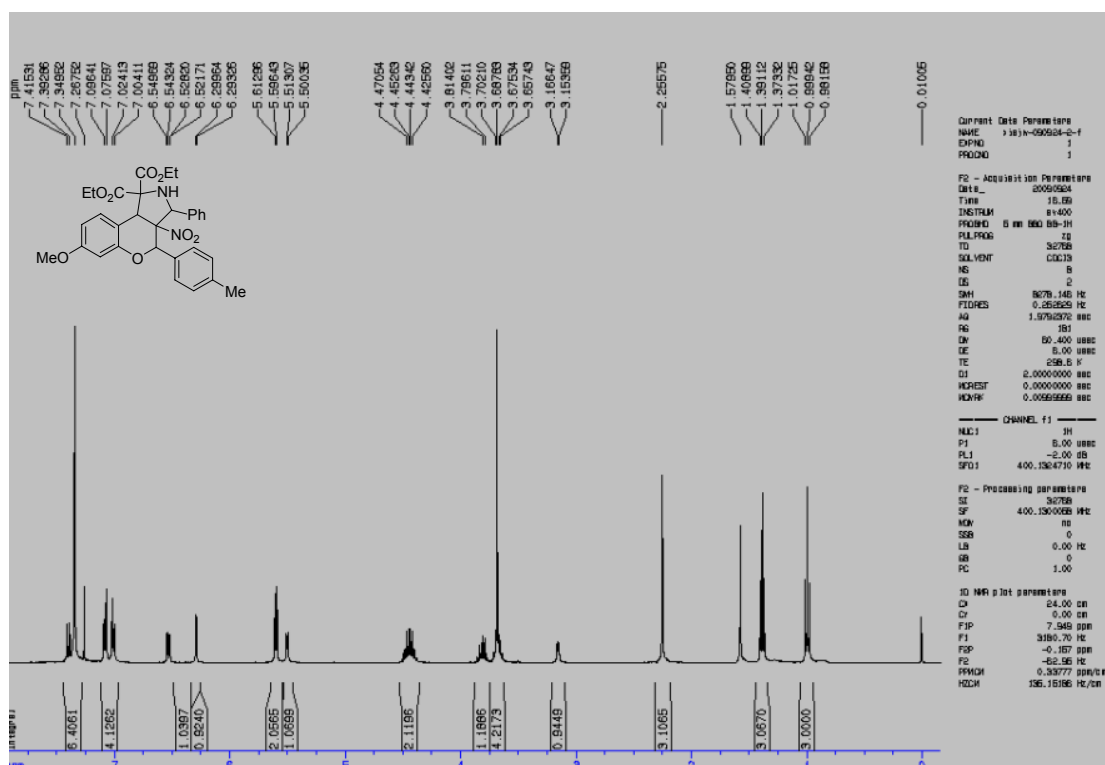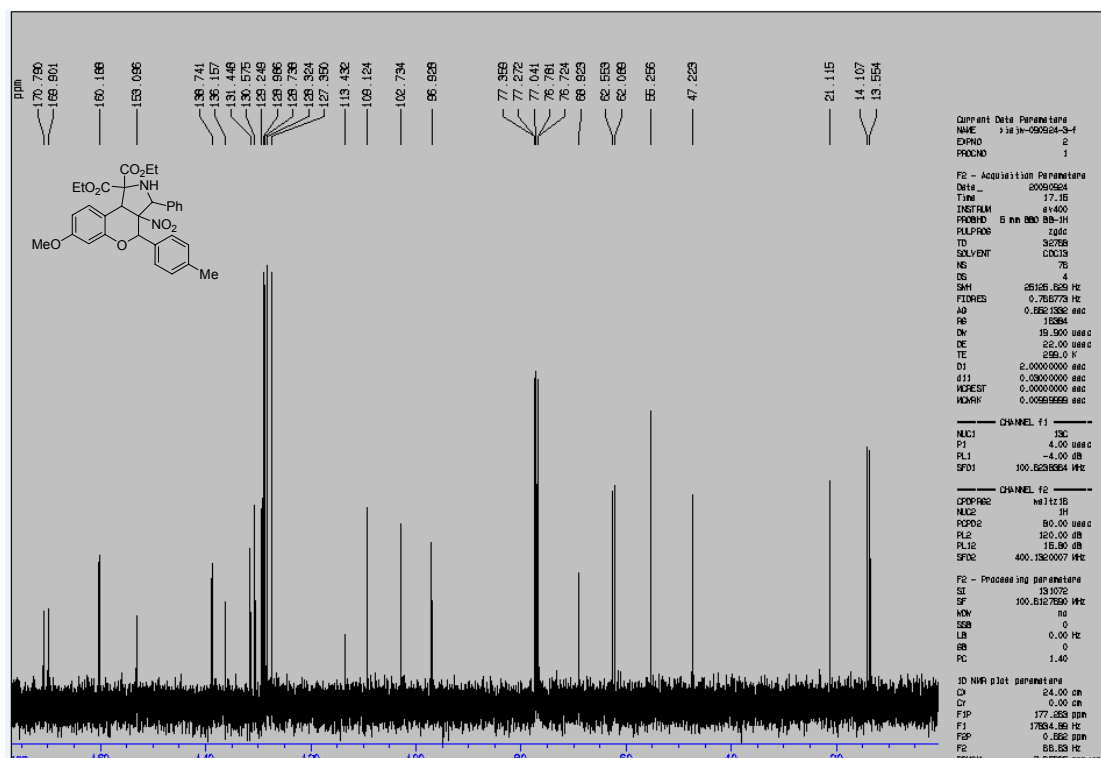

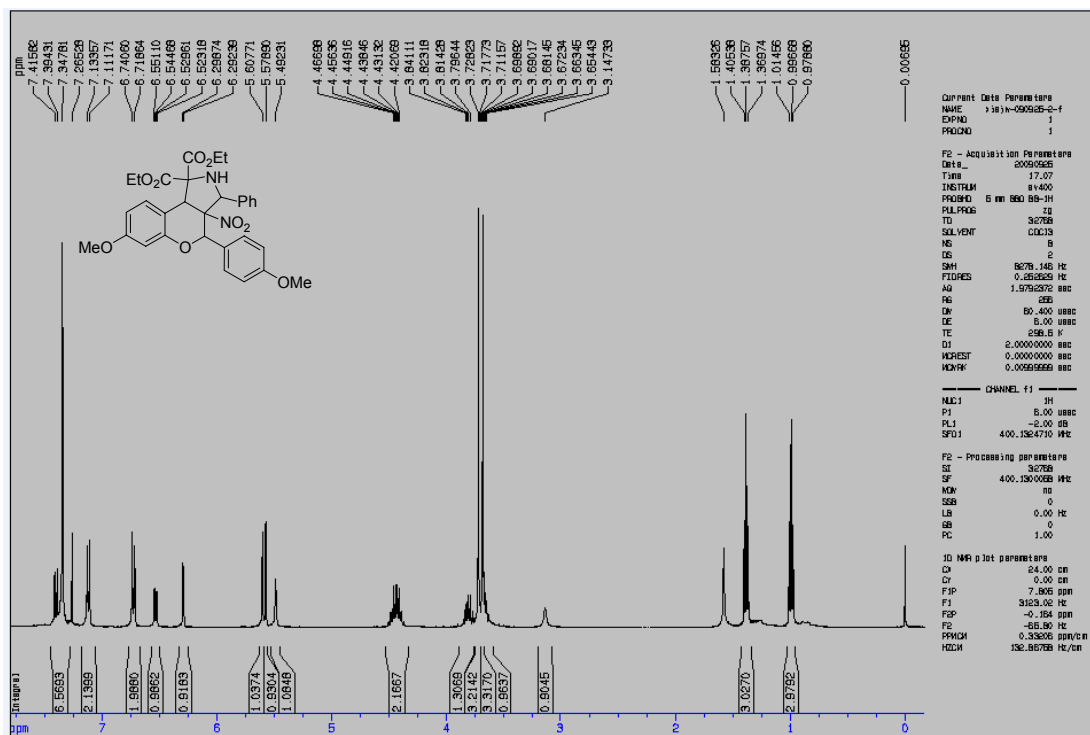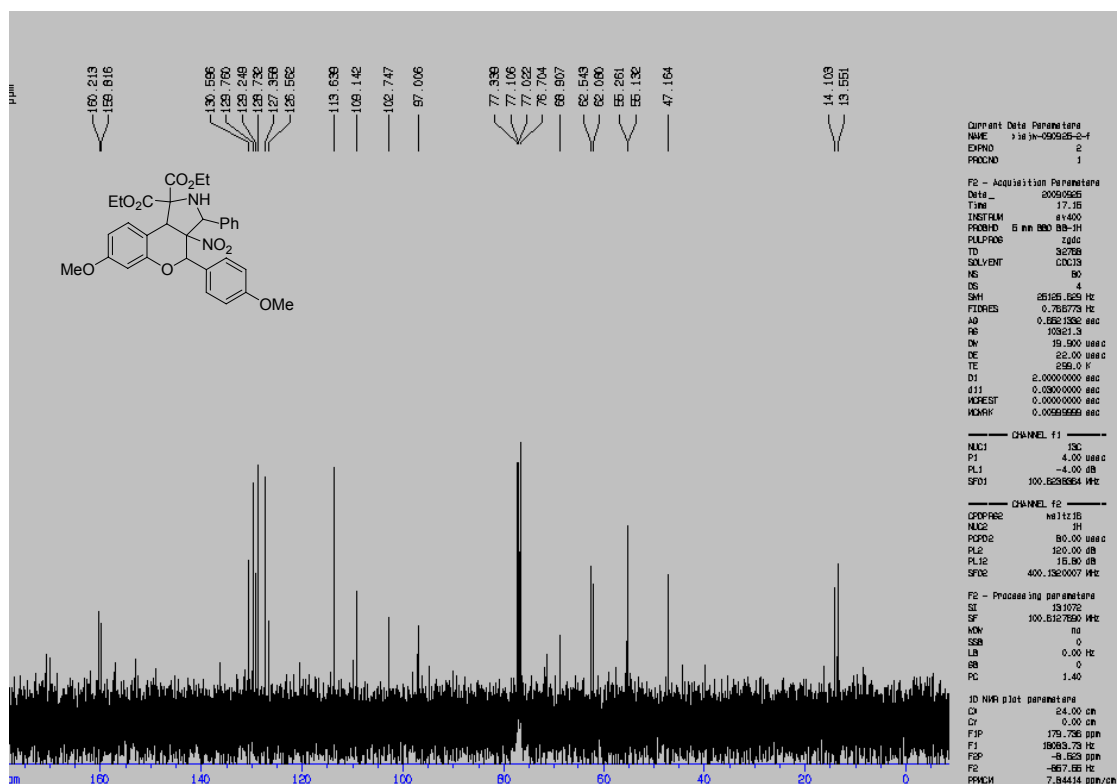

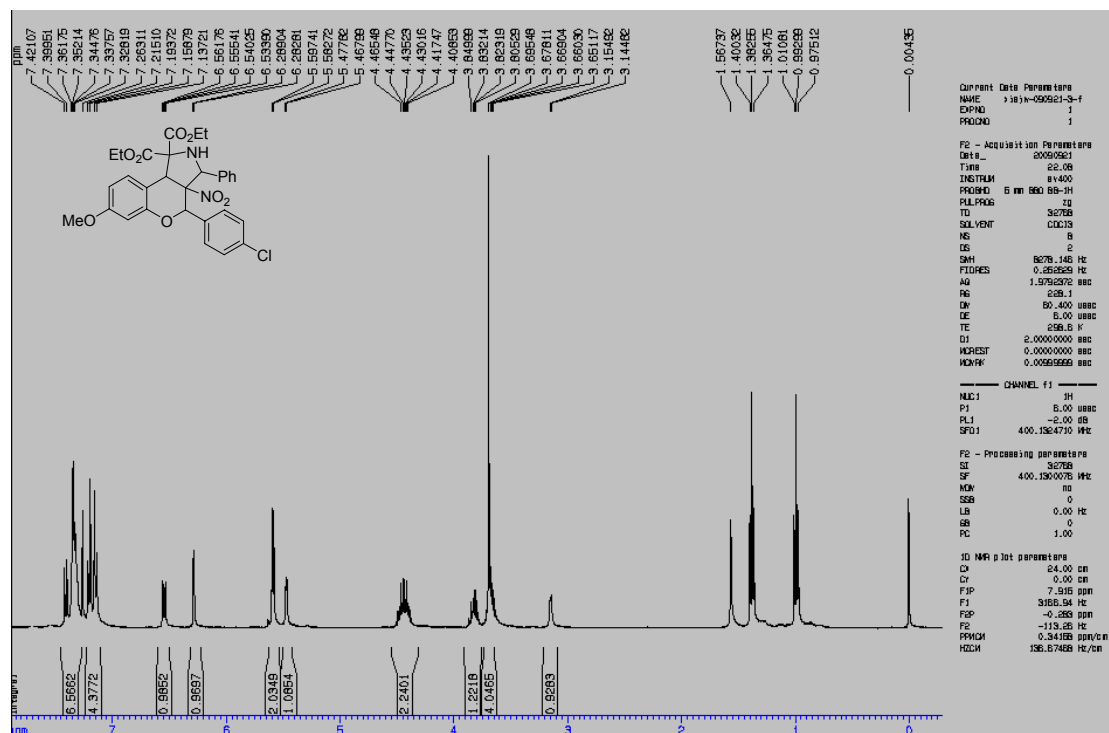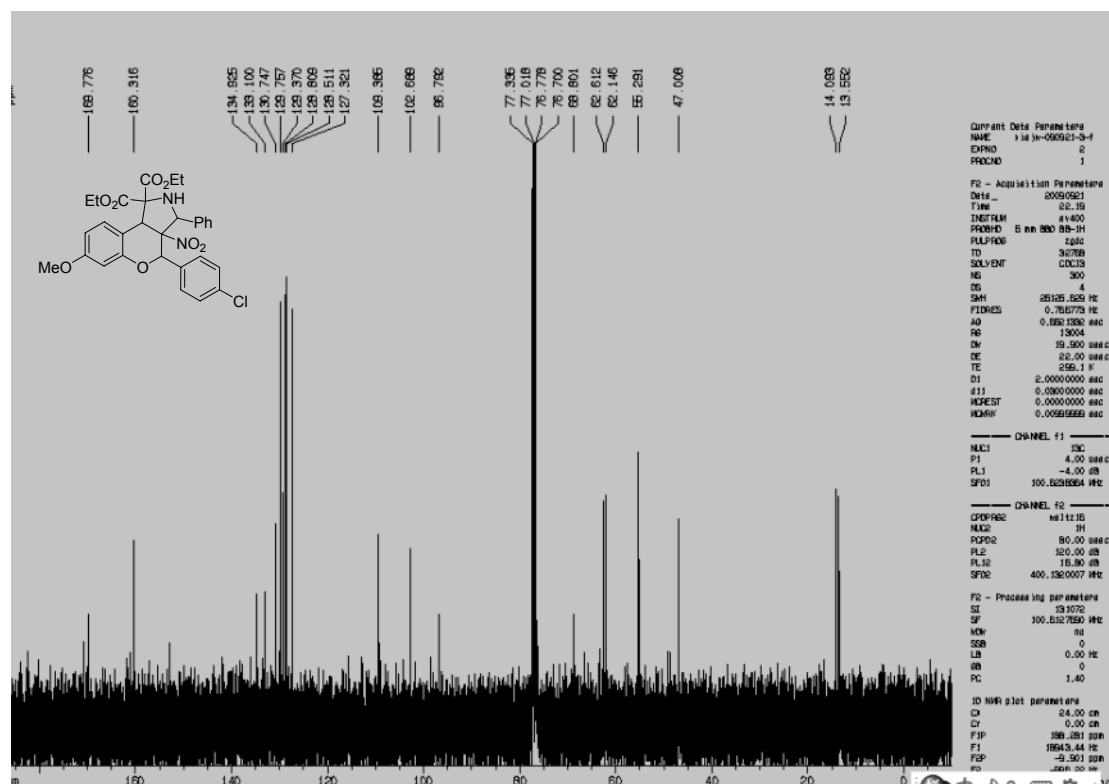



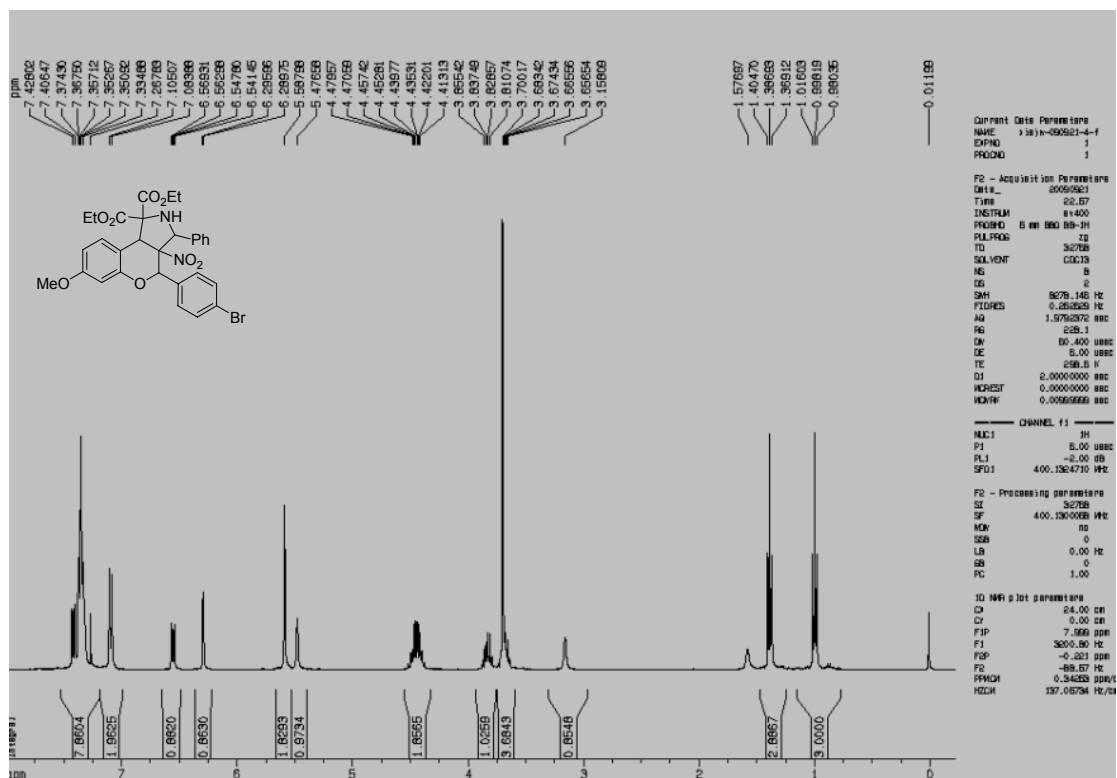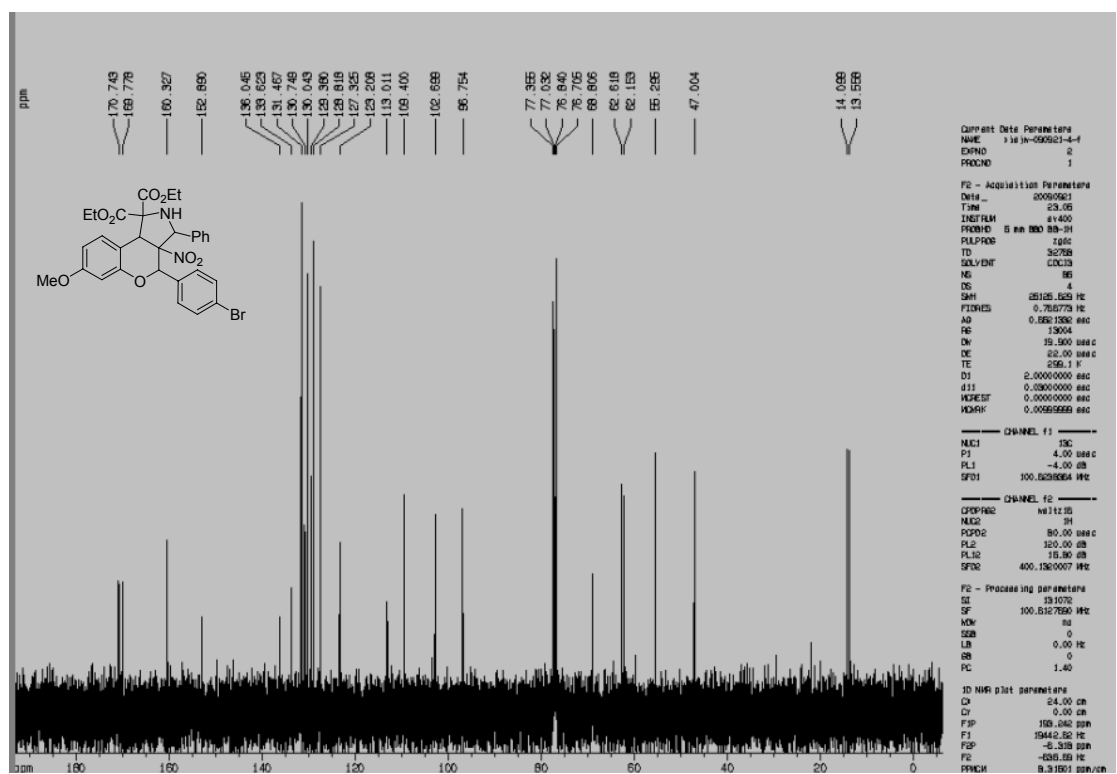

## HPLC spectra

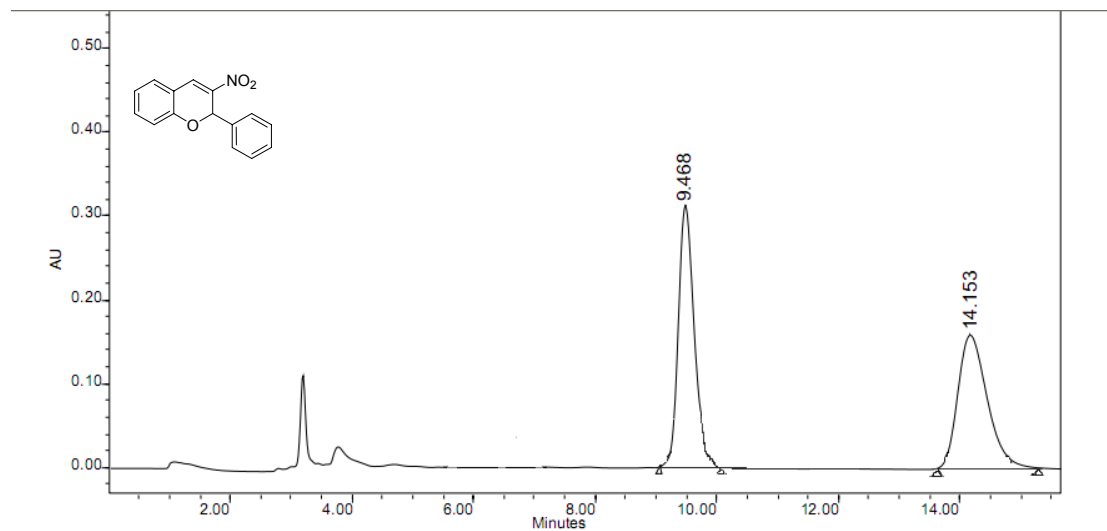

|   | RT (min) | Area (V*sec) | % Area | Height (V) | % Height |
|---|----------|--------------|--------|------------|----------|
| 1 | 9.468    | 4202392      | 49.98  | 274788     | 65.81    |
| 2 | 14.153   | 4205243      | 50.02  | 142791     | 34.19    |

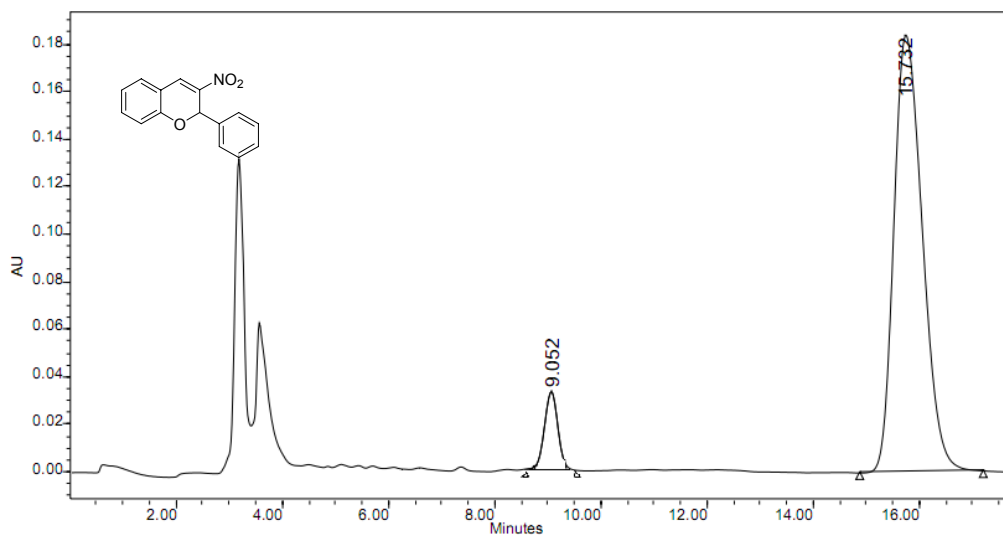

|   | RT (min) | Area (V*sec) | % Area | Height (V) | % Height |
|---|----------|--------------|--------|------------|----------|
| 1 | 9.052    | 487309       | 6.62   | 30470      | 14.21    |
| 2 | 15.732   | 6869416      | 93.38  | 183991     | 85.79    |

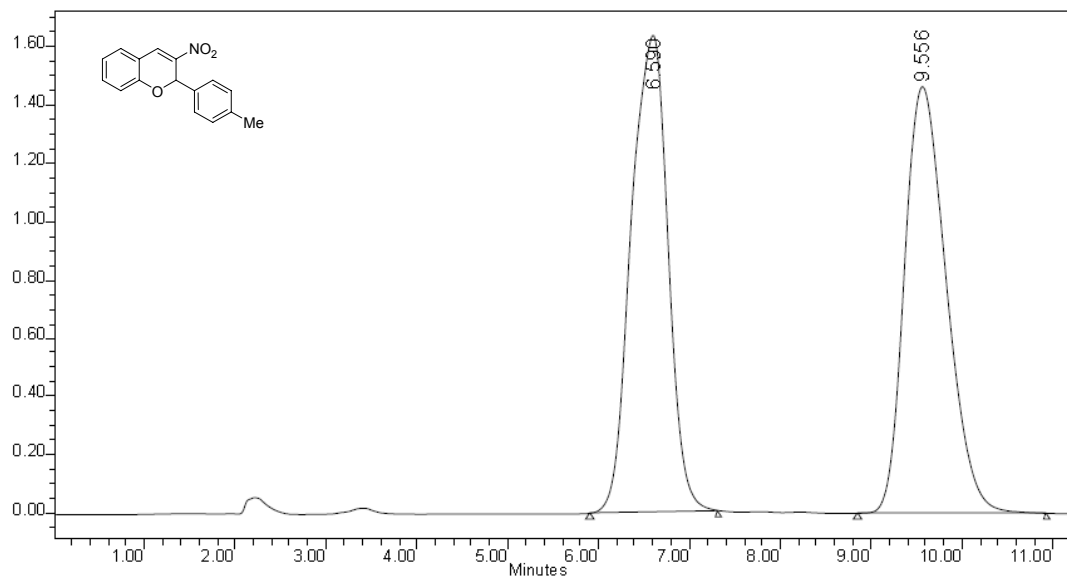

|   | RT (min) | Area (V*sec) | % Area | Height (V) | % Height |
|---|----------|--------------|--------|------------|----------|
| 1 | 6.590    | 45847740     | 49.56  | 1629094    | 52.76    |
| 2 | 9.556    | 46660662     | 50.44  | 1458764    | 47.24    |

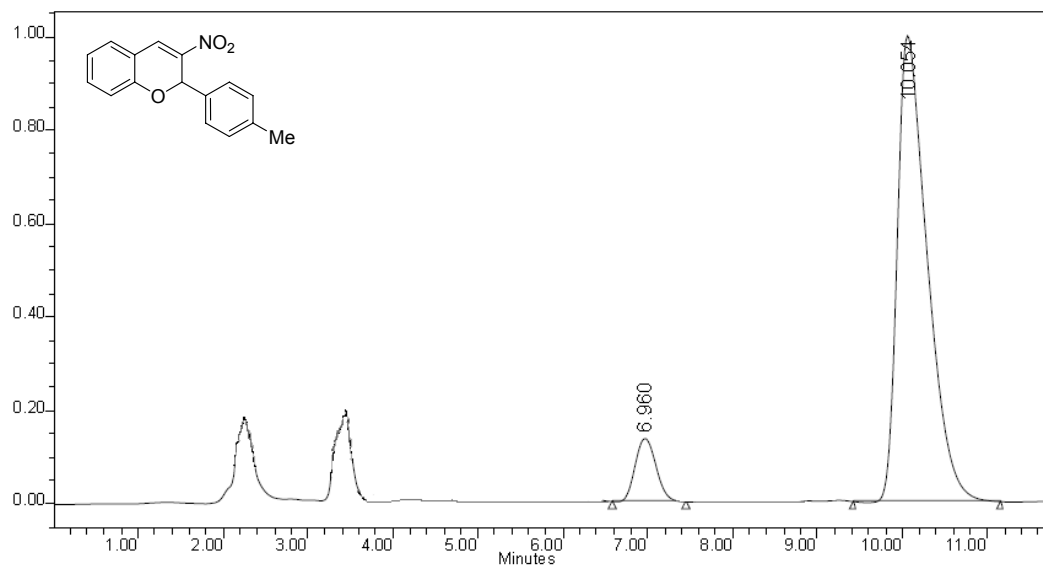

|   | RT (min) | Area (V*sec) | % Area | Height (V) | % Height |
|---|----------|--------------|--------|------------|----------|
| 1 | 6.960    | 2335428      | 8.72   | 135624     | 11.96    |
| 2 | 10.054   | 24438280     | 91.28  | 998480     | 88.04    |

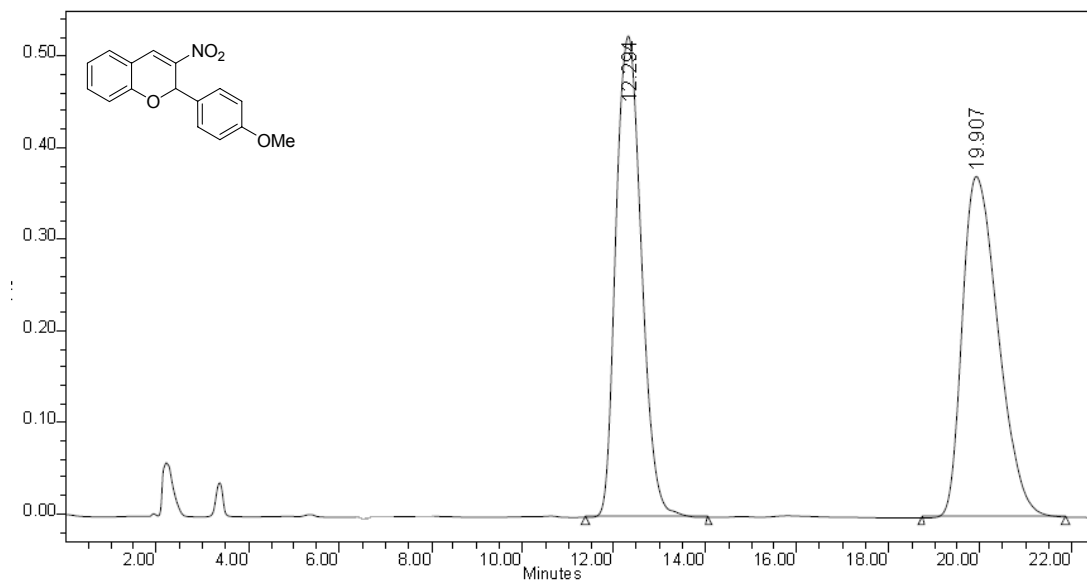

|   | RT (min) | Area (V*sec) | % Area | Height (V) | % Height |
|---|----------|--------------|--------|------------|----------|
| 1 | 12.294   | 20378735     | 50.00  | 525771     | 58.52    |
| 2 | 19.907   | 20378725     | 50.00  | 372628     | 41.48    |

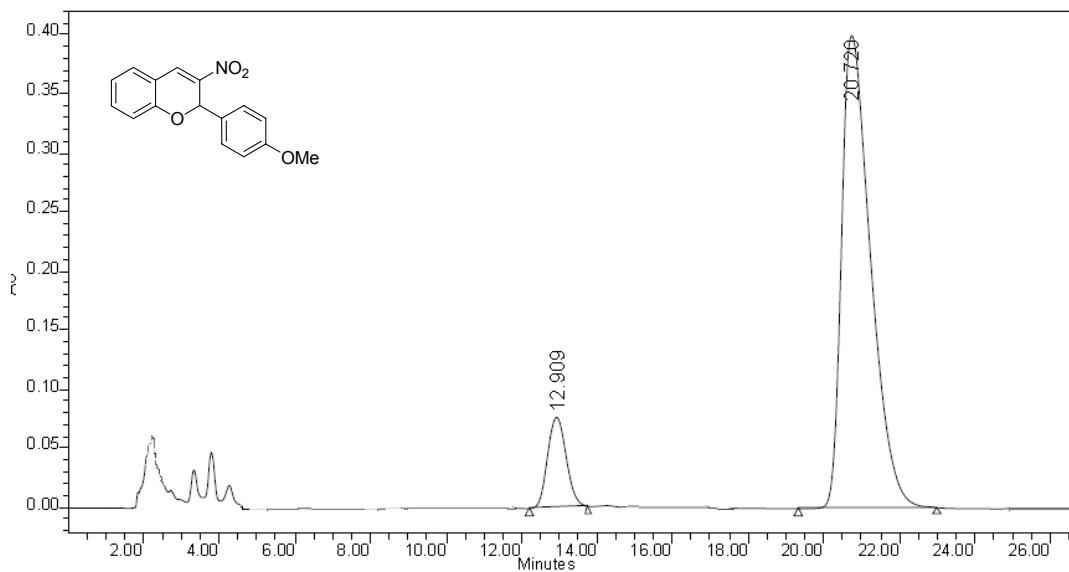

|   | RT (min) | Area (V*sec) | % Area | Height (V) | % Height |
|---|----------|--------------|--------|------------|----------|
| 1 | 12.909   | 2618095      | 10.92  | 76306      | 16.02    |
| 2 | 20.720   | 21363889     | 89.08  | 400057     | 83.98    |

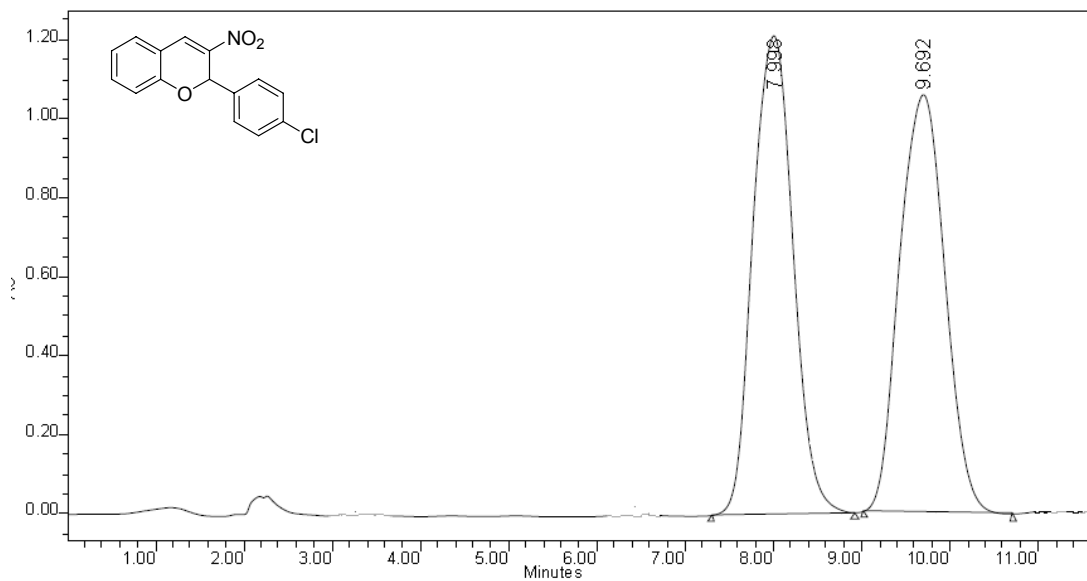

|   | RT (min) | Area (V*sec) | % Area | Height (V) | % Height |
|---|----------|--------------|--------|------------|----------|
| 1 | 7.998    | 38238713     | 50.33  | 1210983    | 53.41    |
| 2 | 9.692    | 37731283     | 49.67  | 1056223    | 46.59    |

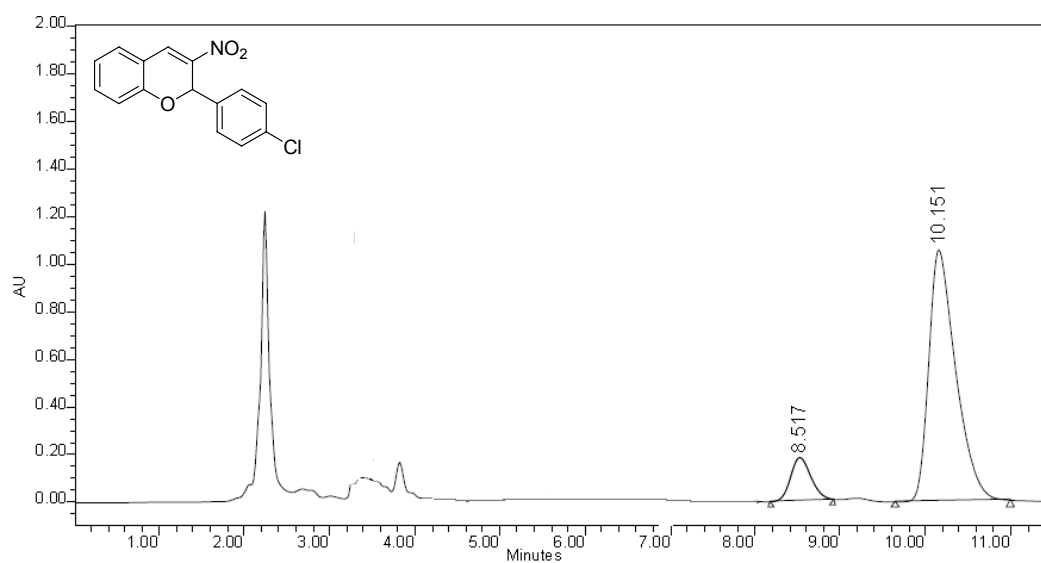

|   | RT (min) | Area (V*sec) | % Area | Height (V) | % Height |
|---|----------|--------------|--------|------------|----------|
| 1 | 8.517    | 3010383      | 11.42  | 181662     | 14.64    |
| 2 | 10.151   | 23358654     | 88.58  | 1059431    | 85.36    |

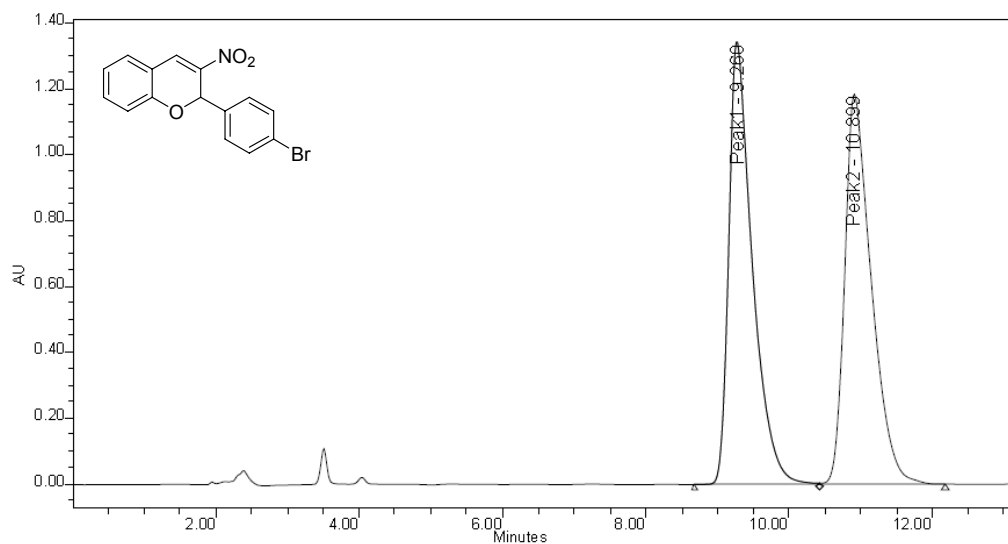

|   | Peak Name | RT (min) | Area ( V*sec) | % Area | Height ( V) | % Height |
|---|-----------|----------|---------------|--------|-------------|----------|
| 1 | Peak1     | 9.260    | 30638729      | 50.09  | 1348064     | 53.23    |
| 2 | Peak2     | 10.899   | 30523843      | 49.91  | 1184637     | 46.77    |

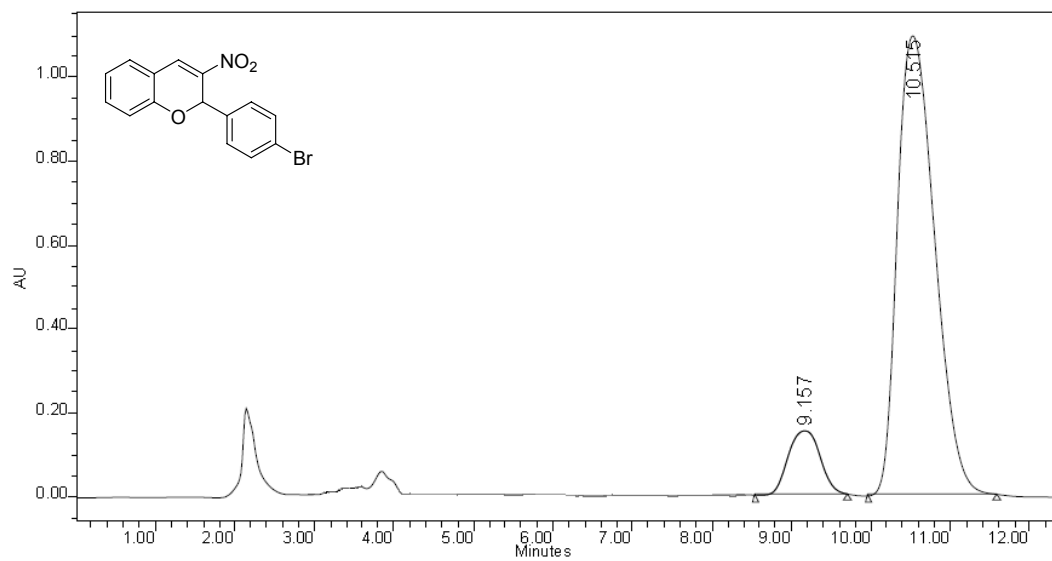

|   | RT (min) | Area ( V*sec) | % Area | Height ( V) | % Height |
|---|----------|---------------|--------|-------------|----------|
| 1 | 9.157    | 4239645       | 10.59  | 151736      | 12.17    |
| 2 | 10.515   | 35785218      | 89.41  | 1094681     | 87.83    |

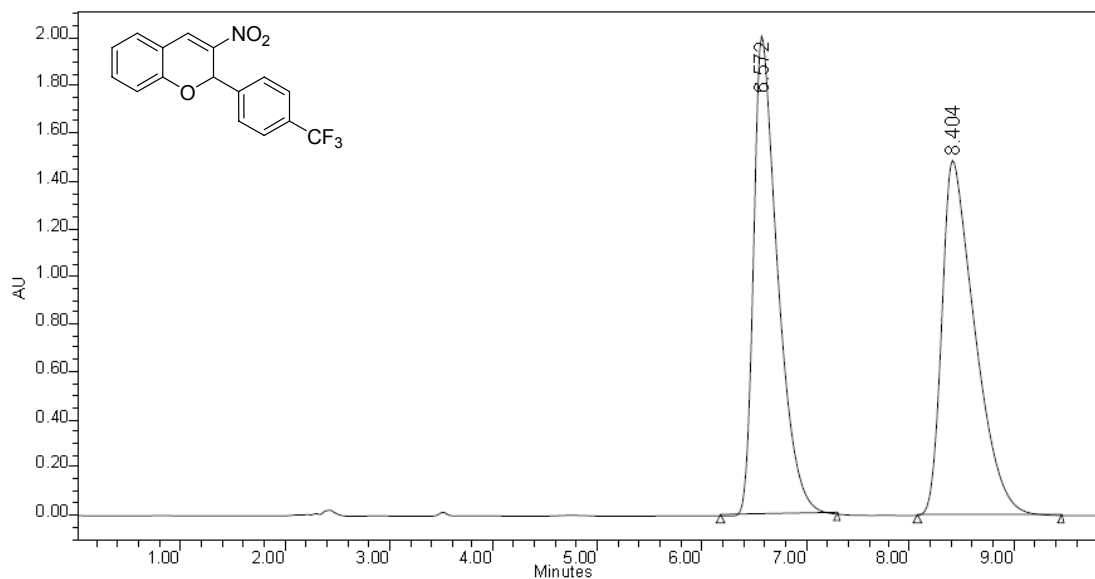

|   | RT (min) | Area (V*sec) | % Area | Height (V) | % Height |
|---|----------|--------------|--------|------------|----------|
| 1 | 6.572    | 32350998     | 49.68  | 2010782    | 57.47    |
| 2 | 8.404    | 32764219     | 50.32  | 1488054    | 42.53    |

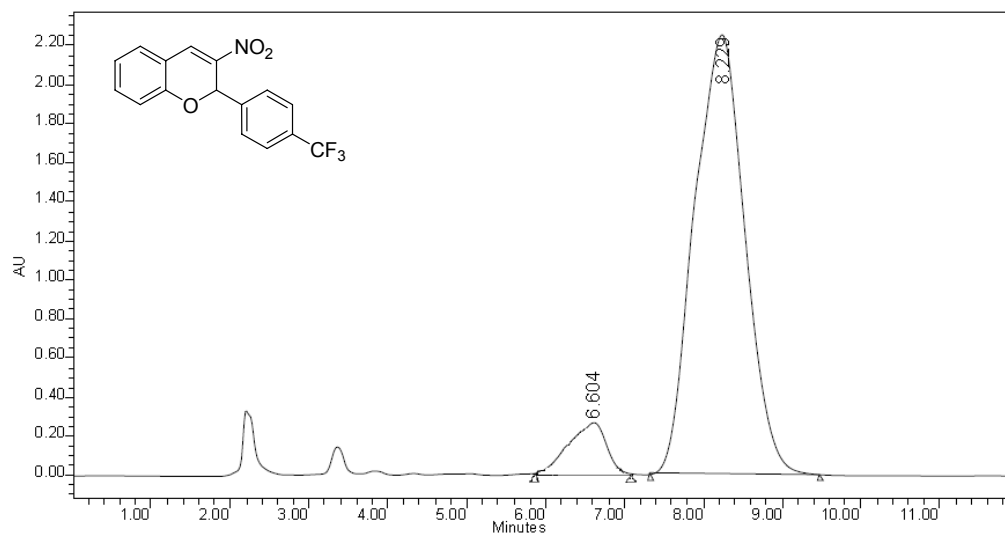

|   | RT (min) | Area (V*sec) | % Area | Height (V) | % Height |
|---|----------|--------------|--------|------------|----------|
| 1 | 6.604    | 7954805      | 7.34   | 247359     | 9.90     |
| 2 | 8.229    | 100396883    | 92.66  | 2251190    | 90.10    |

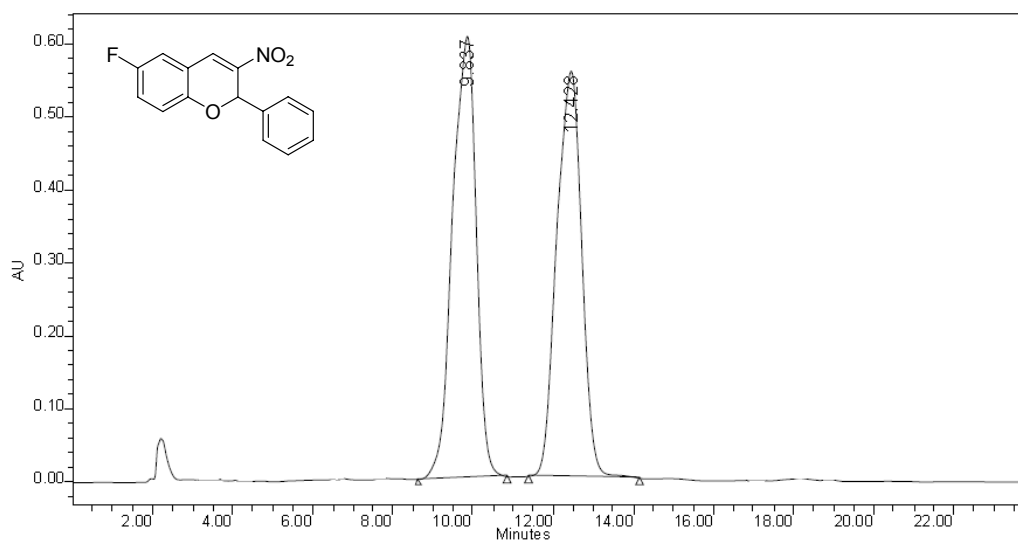

|   | RT (min) | Area (V*sec) | % Area | Height (V) | % Height |
|---|----------|--------------|--------|------------|----------|
| 1 | 9.837    | 24933941     | 50.80  | 604741     | 52.10    |
| 2 | 12.428   | 24148832     | 49.20  | 555987     | 47.90    |

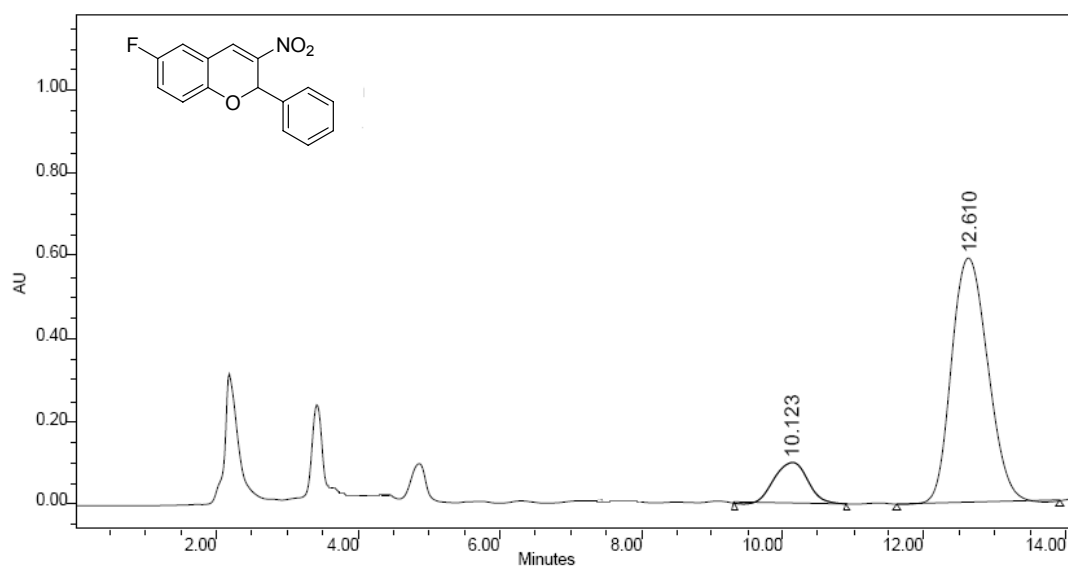

|   | RT (min) | Area (V*sec) | % Area | Height (V) | % Height |
|---|----------|--------------|--------|------------|----------|
| 1 | 10.123   | 3310802      | 13.54  | 99320      | 14.39    |
| 2 | 12.610   | 21137627     | 86.46  | 590826     | 85.61    |



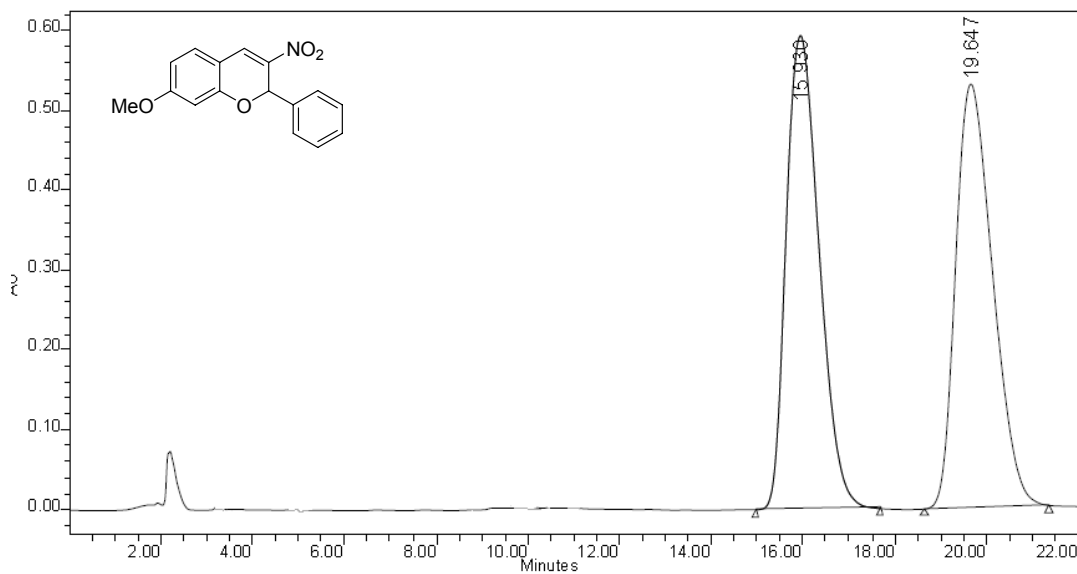

|   | RT (min) | Area (V*sec) | % Area | Height (V) | % Height |
|---|----------|--------------|--------|------------|----------|
| 1 | 15.930   | 29640211     | 49.95  | 593141     | 52.79    |
| 2 | 19.647   | 29703700     | 50.05  | 530415     | 47.21    |

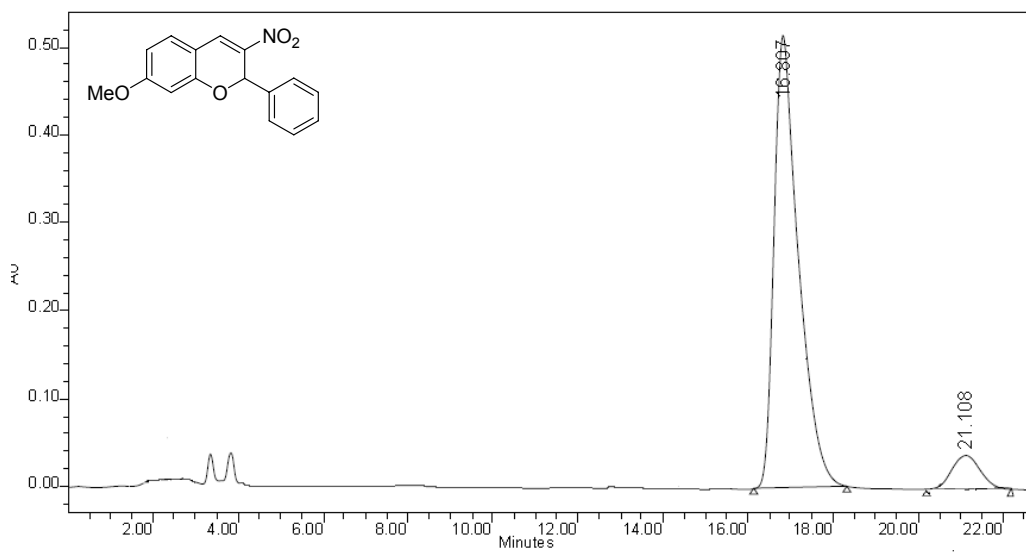

|   | RT (min) | Area (V*sec) | % Area | Height (V) | % Height |
|---|----------|--------------|--------|------------|----------|
| 1 | 16.807   | 20576335     | 92.98  | 514746     | 93.50    |
| 2 | 21.108   | 1554355      | 7.02   | 35808      | 6.50     |

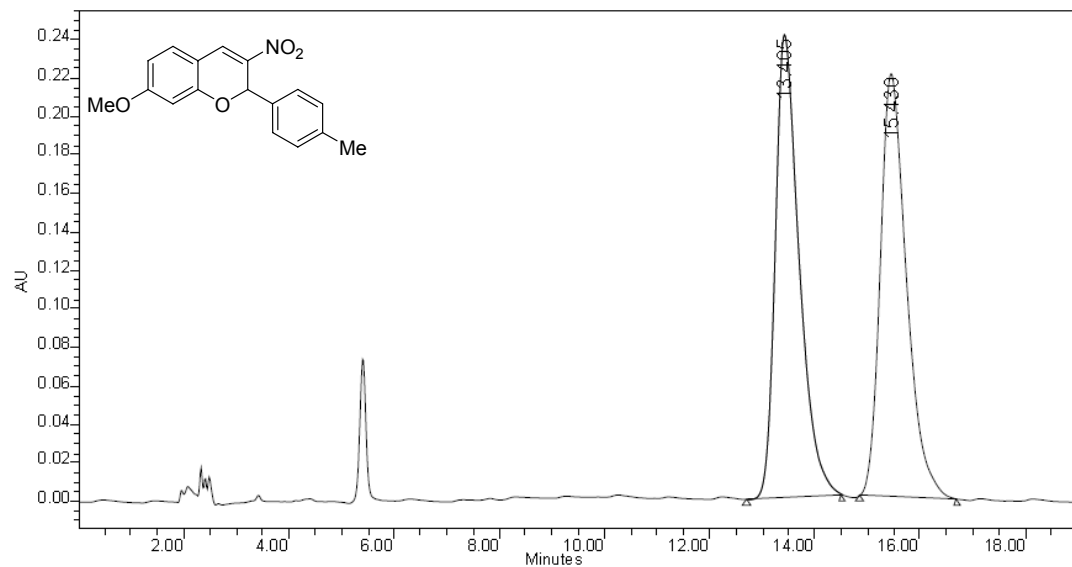

|   | RT (min) | Area (V*sec) | % Area | Height (V) | % Height |
|---|----------|--------------|--------|------------|----------|
| 1 | 13.405   | 7598205      | 50.09  | 240727     | 52.29    |
| 2 | 15.430   | 7572392      | 49.91  | 219661     | 47.71    |

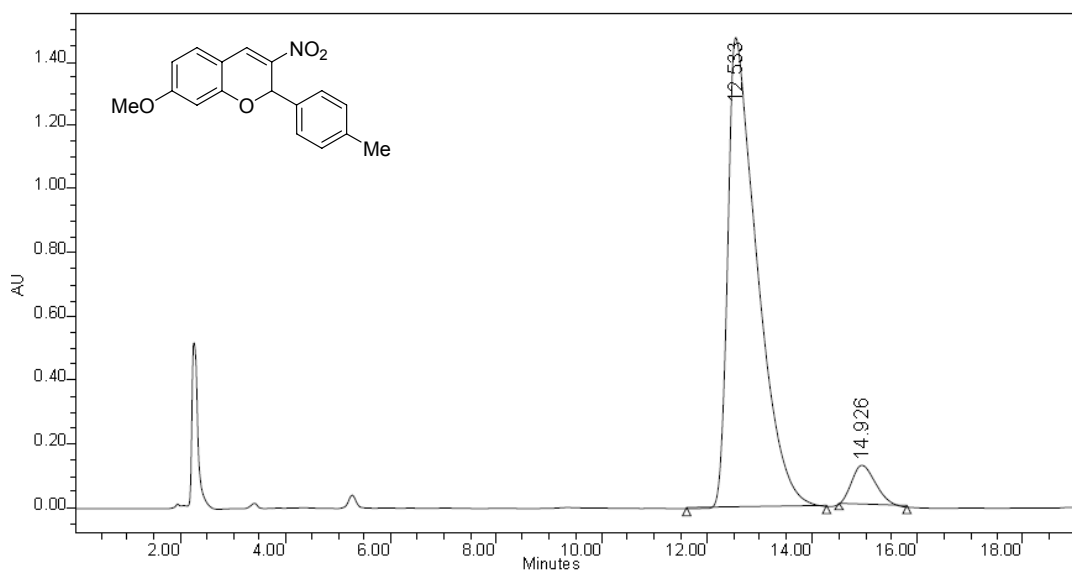

|   | RT (min) | Area (V*sec) | % Area | Height (V) | % Height |
|---|----------|--------------|--------|------------|----------|
| 1 | 12.533   | 57332693     | 93.58  | 1475160    | 92.26    |
| 2 | 14.926   | 3932970      | 6.42   | 123718     | 7.74     |

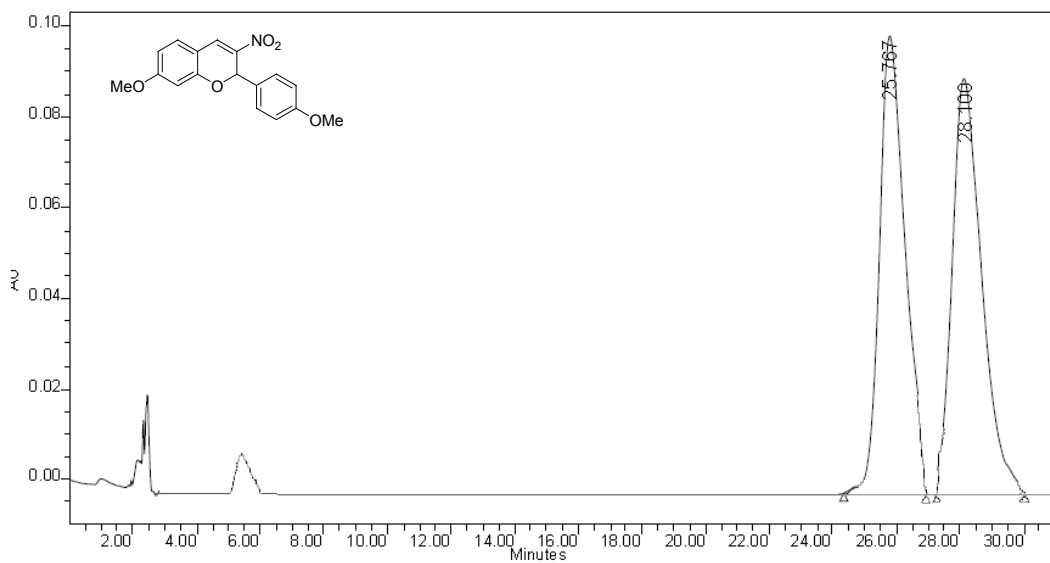

|   | RT (min) | Area (V*sec) | % Area | Height (V) | % Height |
|---|----------|--------------|--------|------------|----------|
| 1 | 25.767   | 5135375      | 49.97  | 96580      | 53.02    |
| 2 | 28.100   | 5142448      | 50.03  | 85585      | 46.98    |

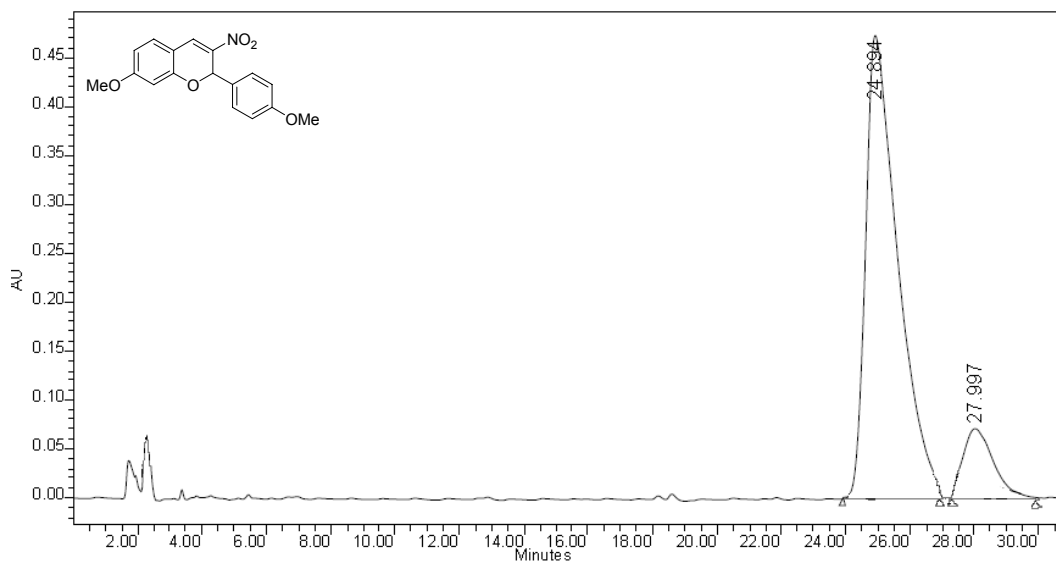

|   | RT (min) | Area (V*sec) | % Area | Height (V) | % Height |
|---|----------|--------------|--------|------------|----------|
| 1 | 24.894   | 31904138     | 91.70  | 470011     | 89.80    |
| 2 | 27.997   | 2887924      | 8.30   | 53408      | 10.20    |

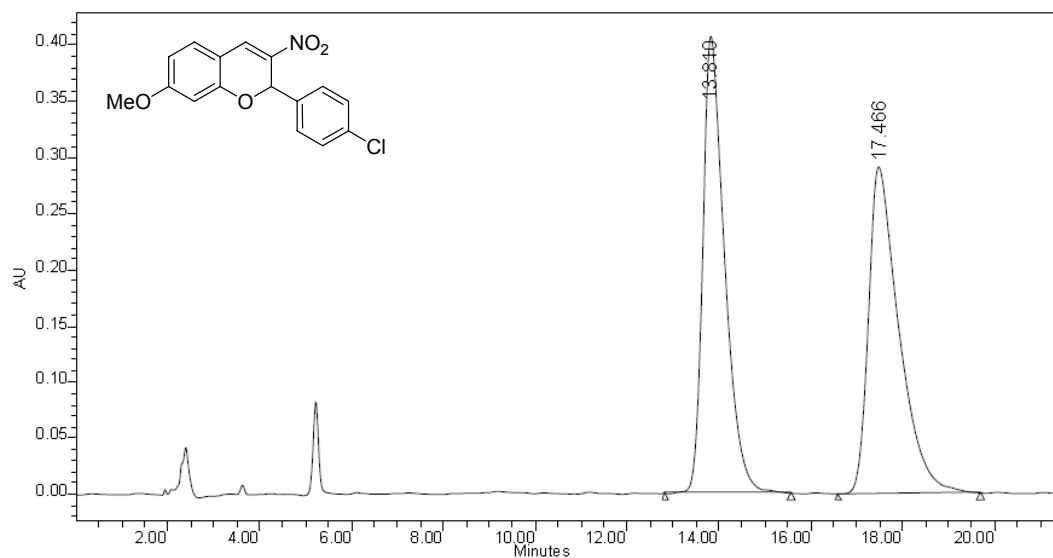

|   | RT (min) | Area (V*sec) | % Area | Height (V) | % Height |
|---|----------|--------------|--------|------------|----------|
| 1 | 13.810   | 13473519     | 50.07  | 407918     | 58.33    |
| 2 | 17.466   | 13435696     | 49.93  | 291398     | 41.67    |

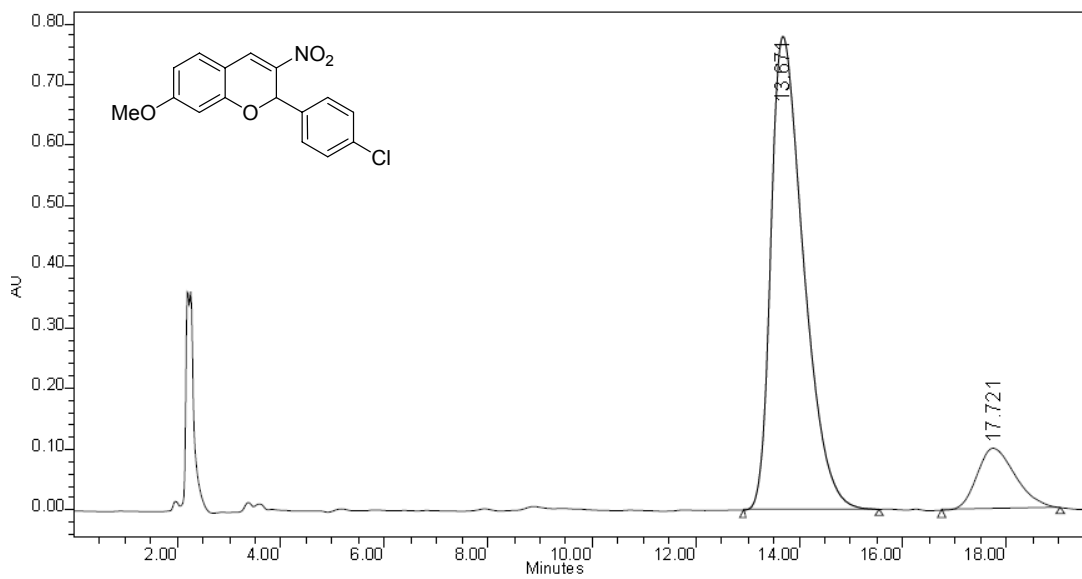

|   | RT (min) | Area (V*sec) | % Area | Height (V) | % Height |
|---|----------|--------------|--------|------------|----------|
| 1 | 13.671   | 34107803     | 86.81  | 778381     | 88.58    |
| 2 | 17.721   | 5183335      | 13.19  | 100319     | 11.42    |

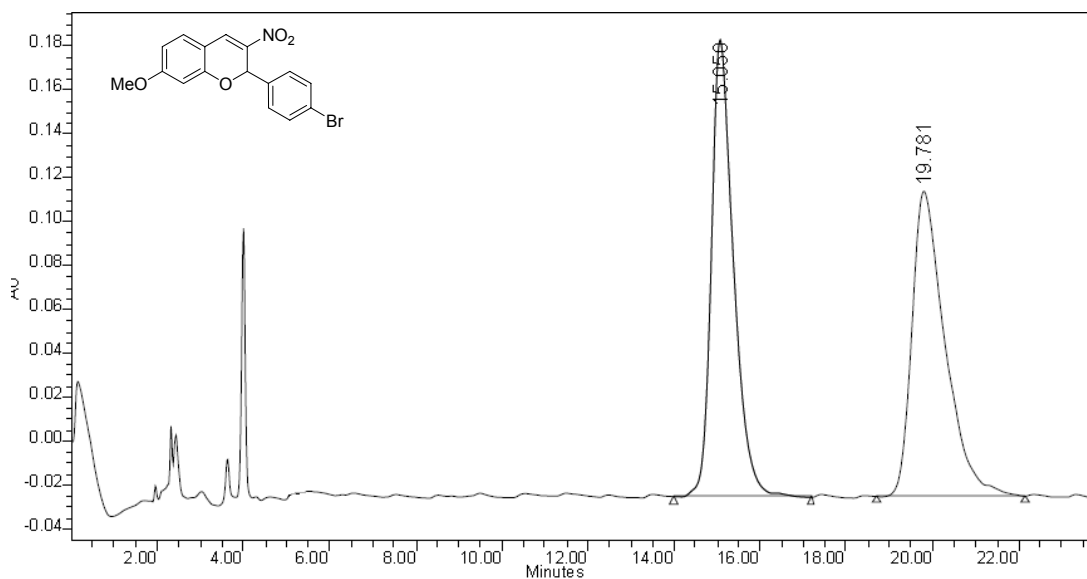

|   | RT (min) | Area (V*sec) | % Area | Height (V) | % Height |
|---|----------|--------------|--------|------------|----------|
| 1 | 15.050   | 7467985      | 50.07  | 208414     | 59.96    |
| 2 | 19.781   | 7445624      | 49.93  | 139153     | 40.04    |

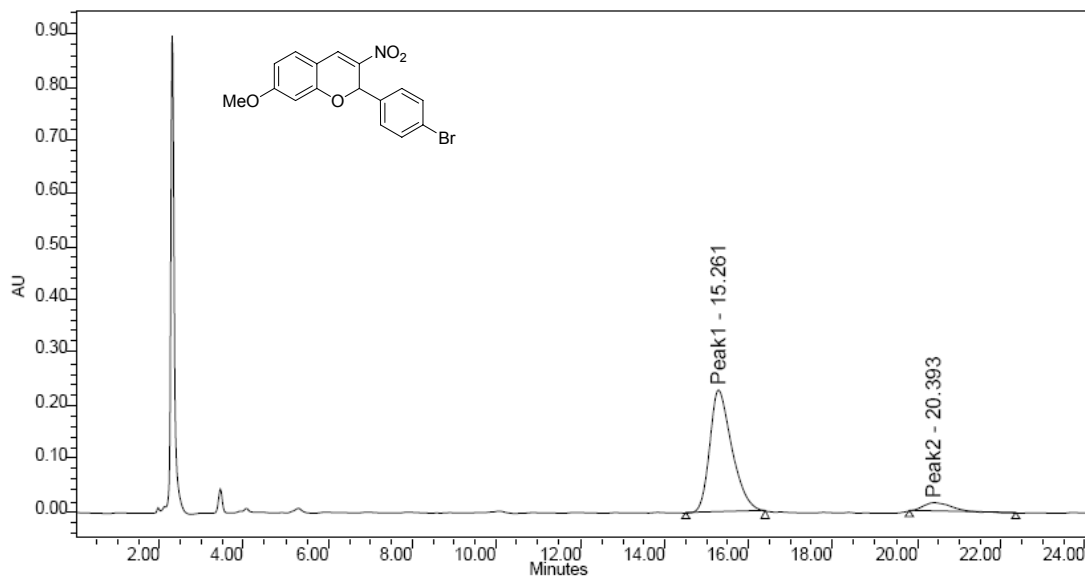

|   | Peak Name | RT (min) | Area (V*sec) | % Area | Height (V) | % Height |
|---|-----------|----------|--------------|--------|------------|----------|
| 1 | Peak1     | 15.261   | 8511896      | 91.18  | 230711     | 93.34    |
| 2 | Peak2     | 20.393   | 822942       | 8.82   | 16455      | 6.66     |

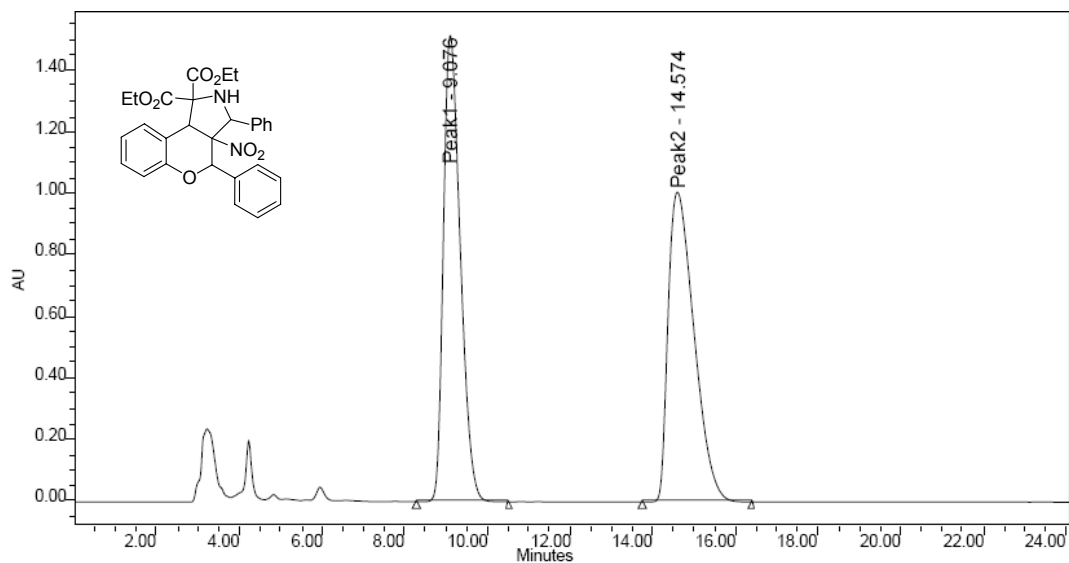

| Peak Name | RT (min) | Area (V*sec) | % Area | Height (V) | % Height |
|-----------|----------|--------------|--------|------------|----------|
| 1 Peak1   | 9.076    | 42987991     | 49.52  | 1515973    | 60.08    |
| 2 Peak2   | 14.574   | 43814121     | 50.48  | 1007398    | 39.92    |

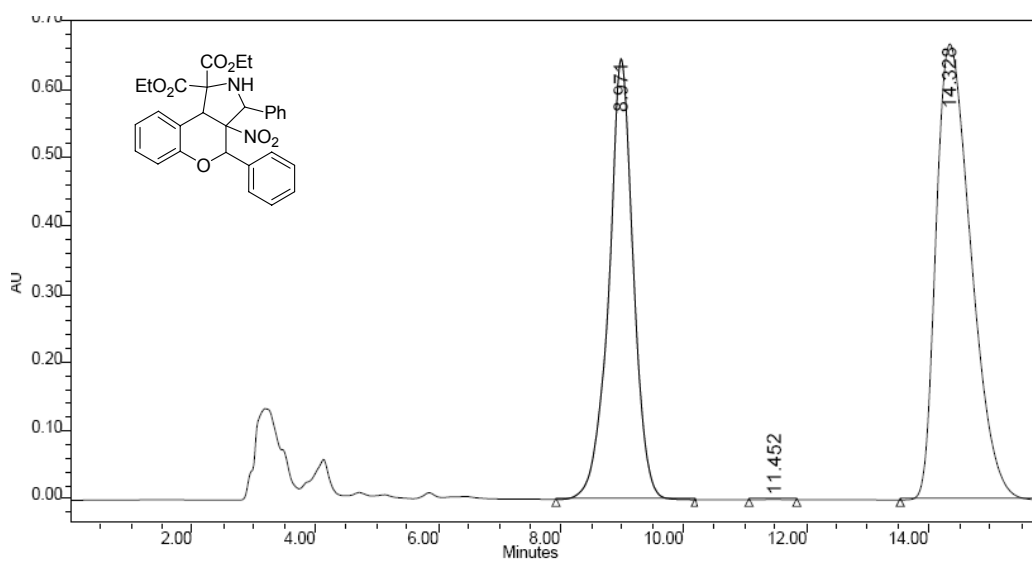

| RT (min) | Area (V*sec) | % Area | Height (V) | % Height |
|----------|--------------|--------|------------|----------|
| 1 8.971  | 17942623     | 40.43  | 645362     | 49.14    |
| 2 11.452 | 11508        | 0.03   | 491        | 0.04     |
| 3 14.328 | 26422176     | 59.54  | 667464     | 50.82    |

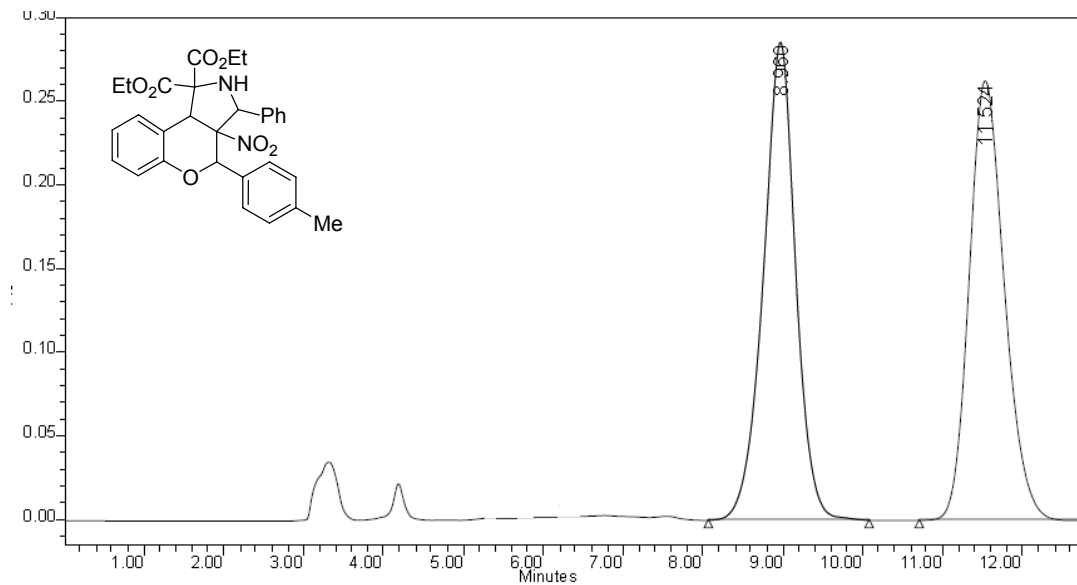

|   | RT (min) | Area (V*sec) | % Area | Height (V) | % Height |
|---|----------|--------------|--------|------------|----------|
| 1 | 8.960    | 8037422      | 49.97  | 285784     | 52.09    |
| 2 | 11.524   | 8048352      | 50.03  | 262805     | 47.91    |

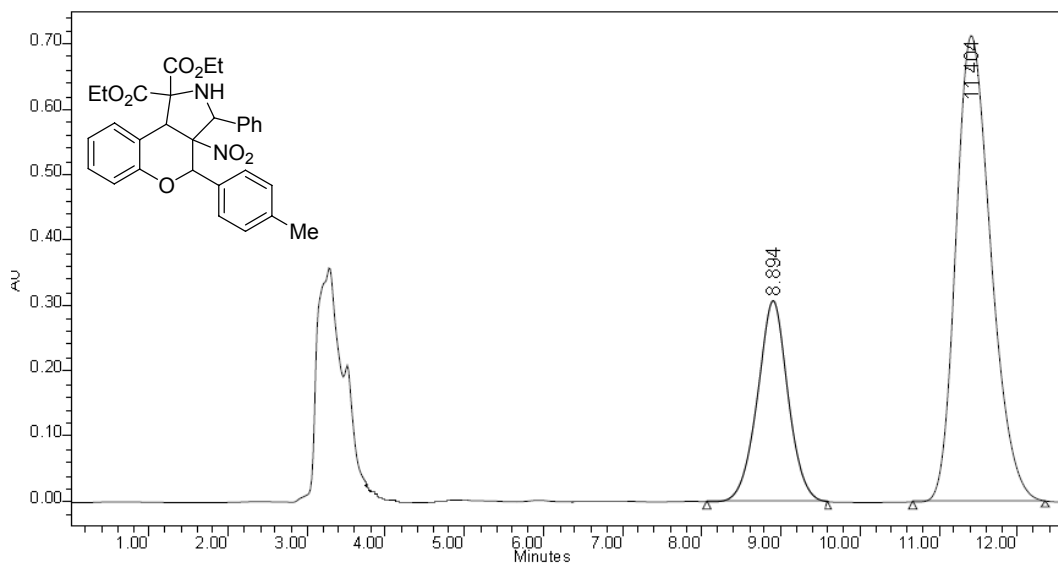

|   | RT (min) | Area (V*sec) | % Area | Height (V) | % Height |
|---|----------|--------------|--------|------------|----------|
| 1 | 8.894    | 8284346      | 27.36  | 307670     | 30.15    |
| 2 | 11.404   | 21999907     | 72.64  | 712899     | 69.85    |

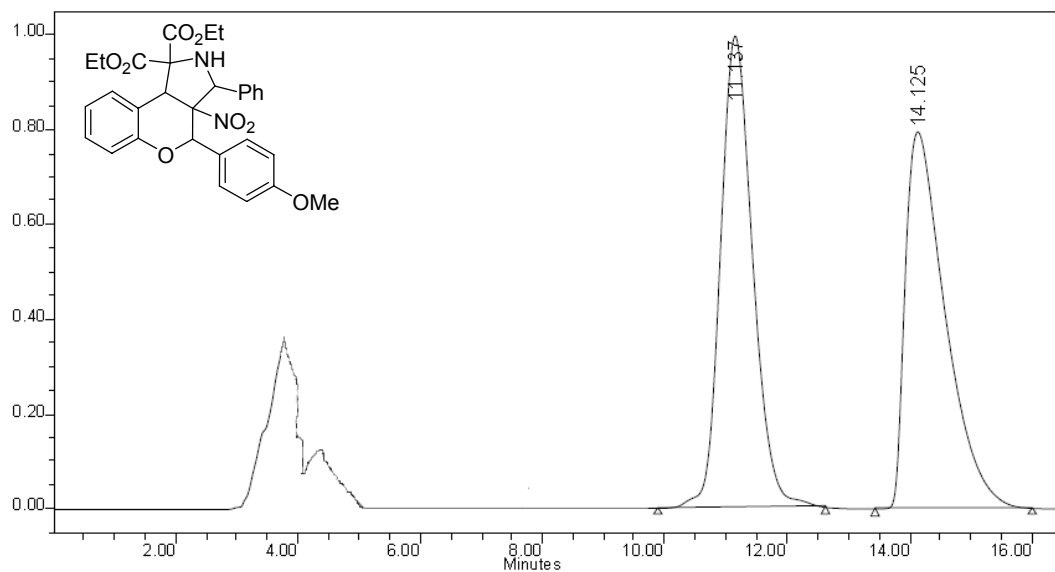

|   | RT (min) | Area (V*sec) | % Area | Height (V) | % Height |
|---|----------|--------------|--------|------------|----------|
| 1 | 11.137   | 36602004     | 50.29  | 995407     | 55.59    |
| 2 | 14.125   | 36173792     | 49.71  | 795205     | 44.41    |

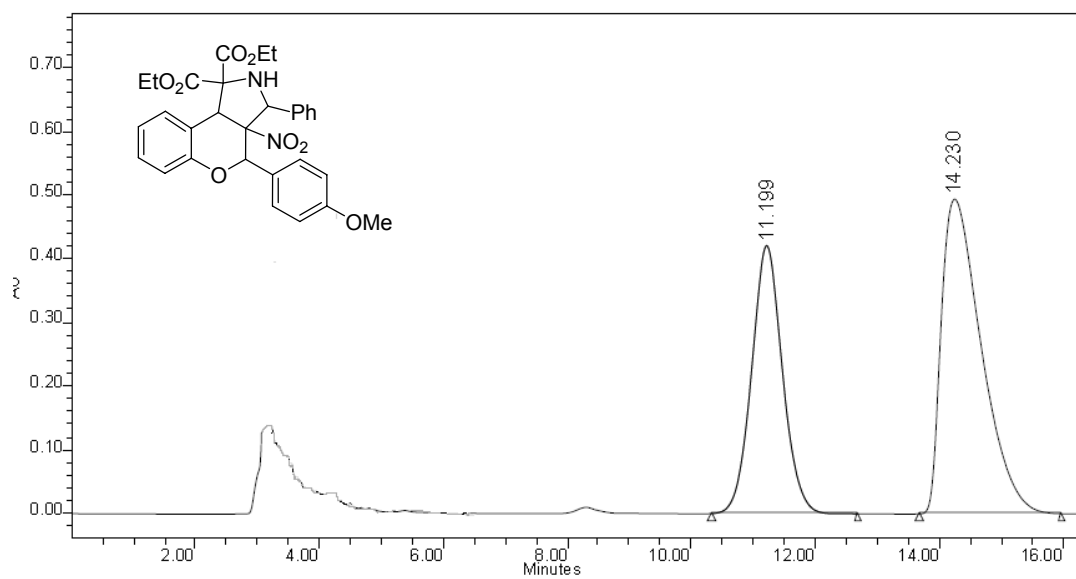

|   | RT (min) | Area (V*sec) | % Area | Height (V) | % Height |
|---|----------|--------------|--------|------------|----------|
| 1 | 11.199   | 14539063     | 39.60  | 421508     | 46.00    |
| 2 | 14.230   | 22176907     | 60.40  | 494837     | 54.00    |



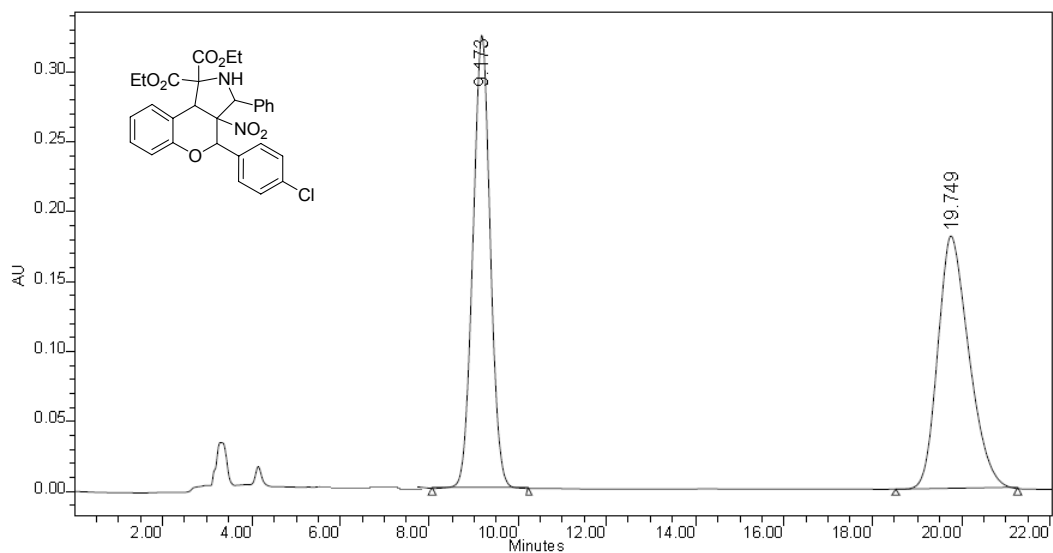

|   | RT (min) | Area (V*sec) | % Area | Height (V) | % Height |
|---|----------|--------------|--------|------------|----------|
| 1 | 9.173    | 8861664      | 49.94  | 324965     | 64.17    |
| 2 | 19.749   | 8882974      | 50.06  | 181468     | 35.83    |

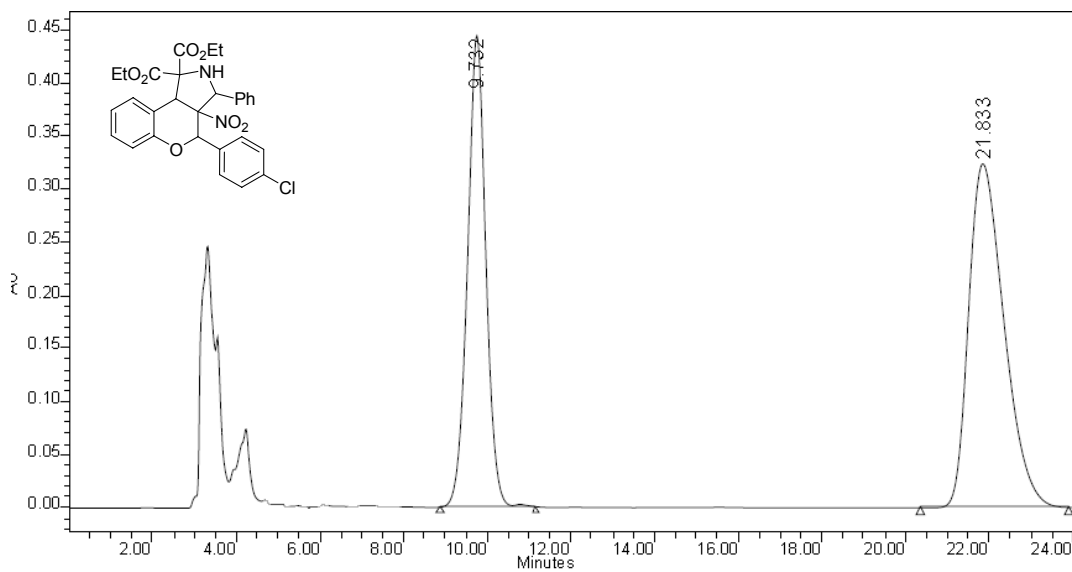

|   | RT (min) | Area (V*sec) | % Area | Height (V) | % Height |
|---|----------|--------------|--------|------------|----------|
| 1 | 9.732    | 13511479     | 41.51  | 443887     | 57.81    |
| 2 | 21.833   | 19035178     | 58.49  | 324002     | 42.19    |

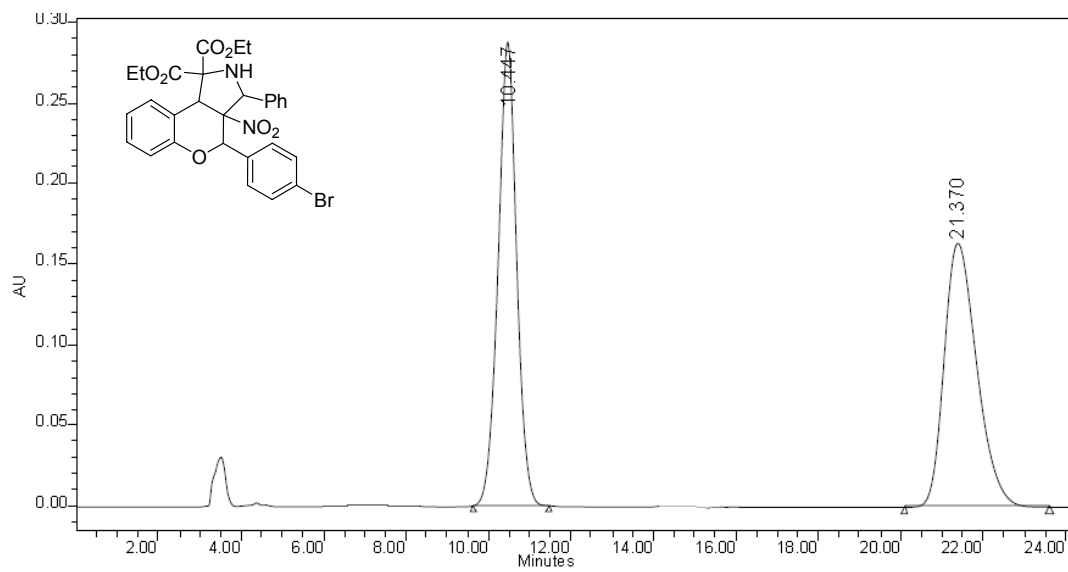

| RT (min) | Area (V*sec) | % Area | Height (V) | % Height |
|----------|--------------|--------|------------|----------|
| 1        | 8971284      | 49.88  | 287054     | 63.71    |
| 2        | 9014555      | 50.12  | 163502     | 36.29    |

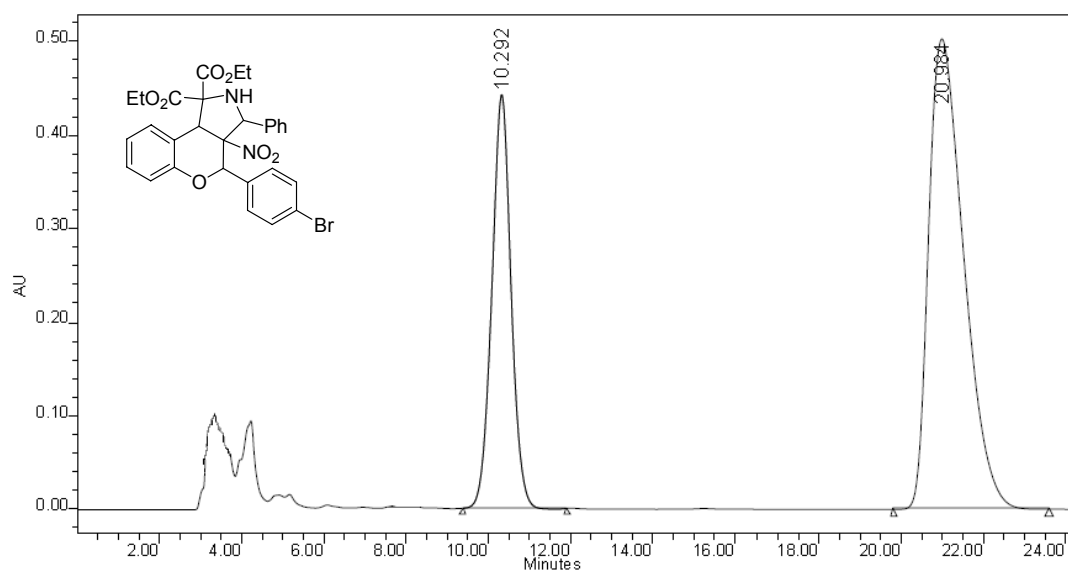

| RT (min) | Area (V*sec) | % Area | Height (V) | % Height |
|----------|--------------|--------|------------|----------|
| 1        | 14355179     | 32.51  | 442713     | 46.79    |
| 2        | 29796439     | 67.49  | 503535     | 53.21    |

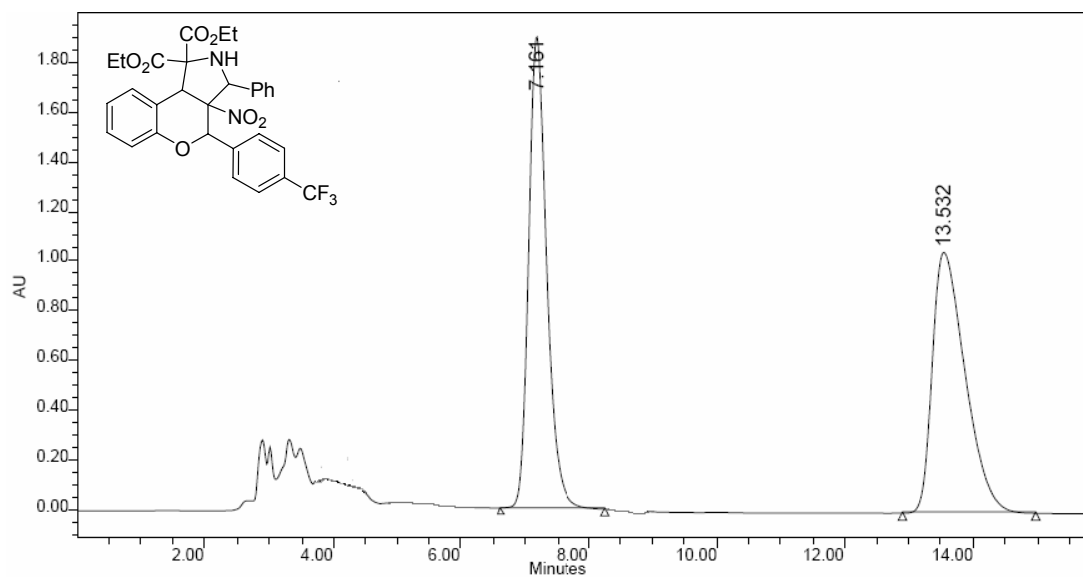

|   | RT (min) | Area (V*sec) | % Area | Height (V) | % Height |
|---|----------|--------------|--------|------------|----------|
| 1 | 7.161    | 37279333     | 49.95  | 1893789    | 64.39    |
| 2 | 13.532   | 37359740     | 50.05  | 1047223    | 35.61    |

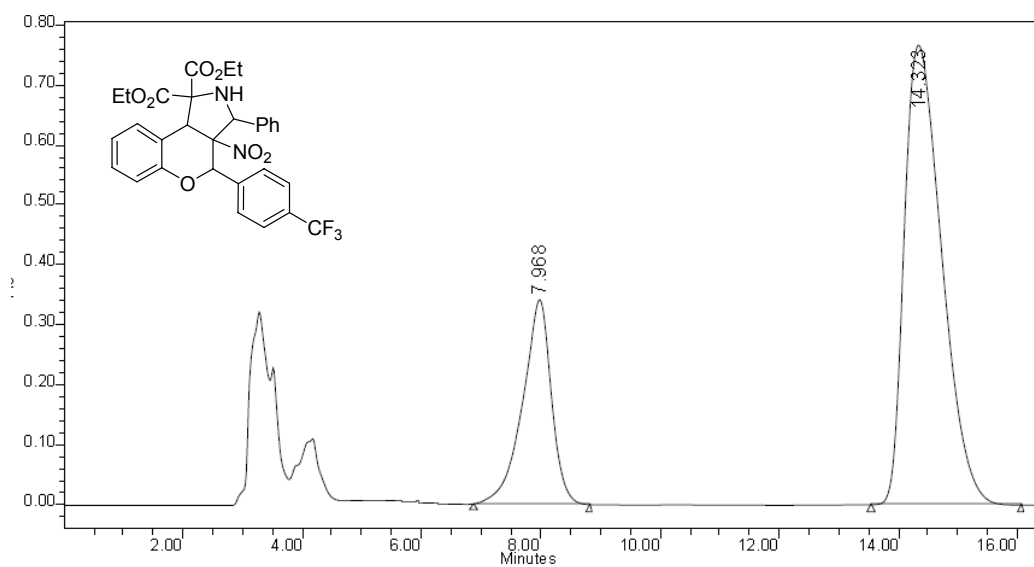

|   | RT (min) | Area (V*sec) | % Area | Height (V) | % Height |
|---|----------|--------------|--------|------------|----------|
| 1 | 7.968    | 11453950     | 25.47  | 341583     | 30.80    |
| 2 | 14.323   | 33517777     | 74.53  | 767278     | 69.20    |

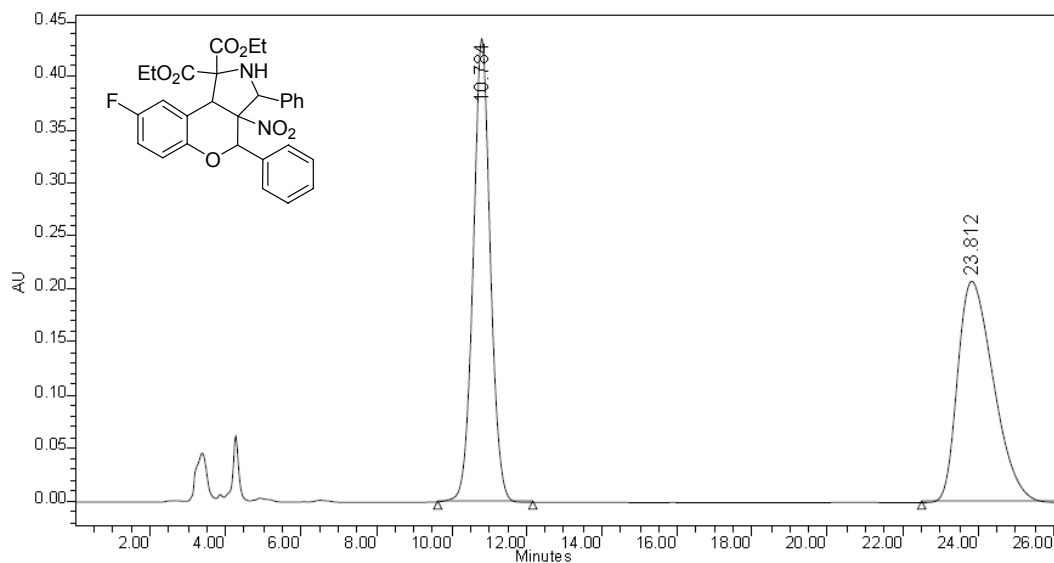

|   | RT (min) | Area (V*sec) | % Area | Height (V) | % Height |
|---|----------|--------------|--------|------------|----------|
| 1 | 10.784   | 13833465     | 49.98  | 436024     | 67.66    |
| 2 | 23.812   | 13845348     | 50.02  | 208369     | 32.34    |

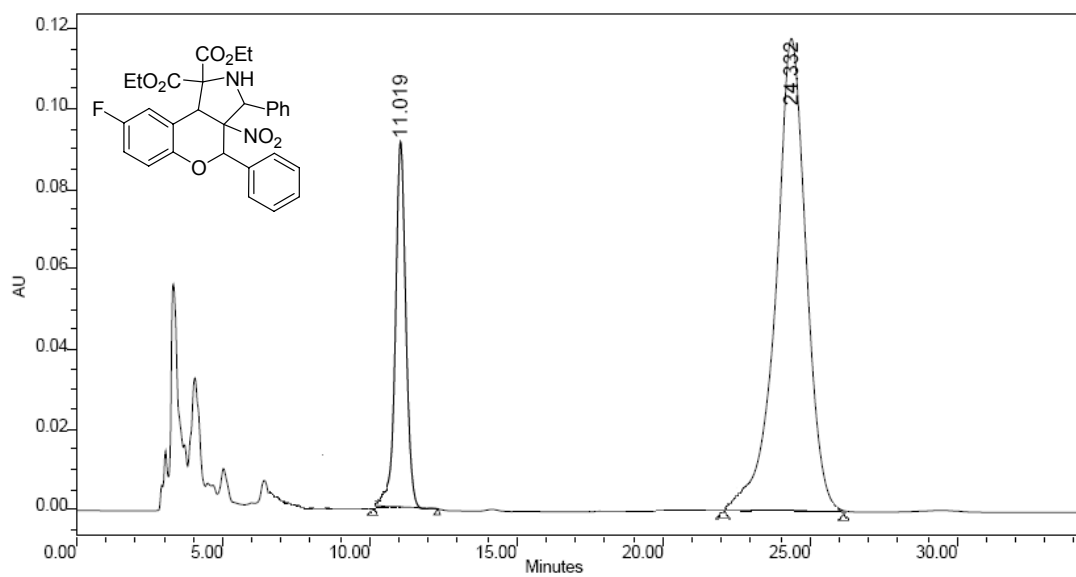

|   | RT (min) | Area (V*sec) | % Area | Height (V) | % Height |
|---|----------|--------------|--------|------------|----------|
| 1 | 11.019   | 2432567      | 23.73  | 91382      | 44.23    |
| 2 | 24.332   | 7817874      | 76.27  | 115203     | 55.77    |

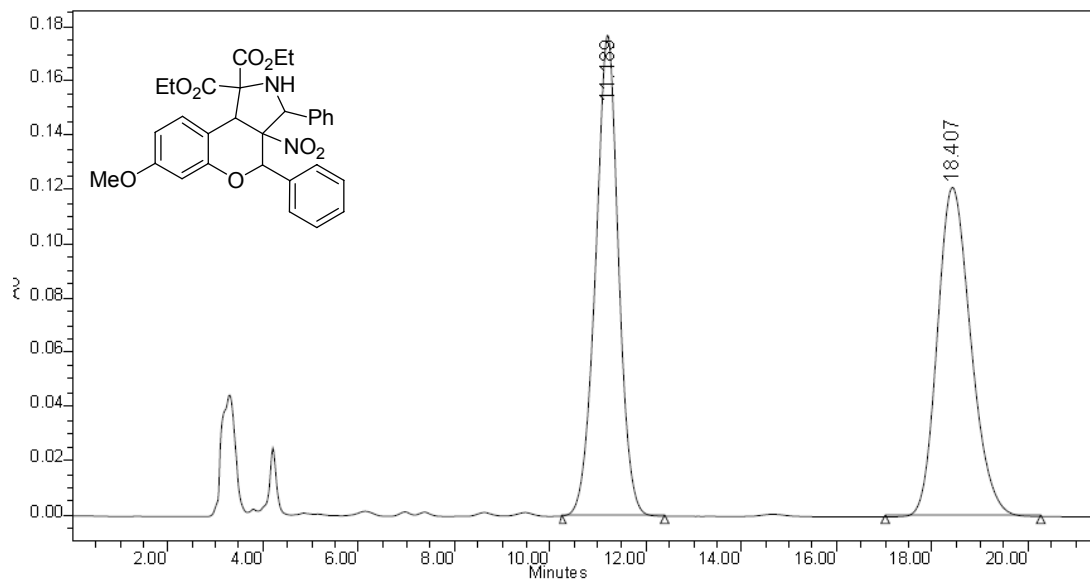

|   | RT (min) | Area (V*sec) | % Area | Height (V) | % Height |
|---|----------|--------------|--------|------------|----------|
| 1 | 11.189   | 5910230      | 49.92  | 177150     | 59.34    |
| 2 | 18.407   | 5929164      | 50.08  | 121383     | 40.66    |

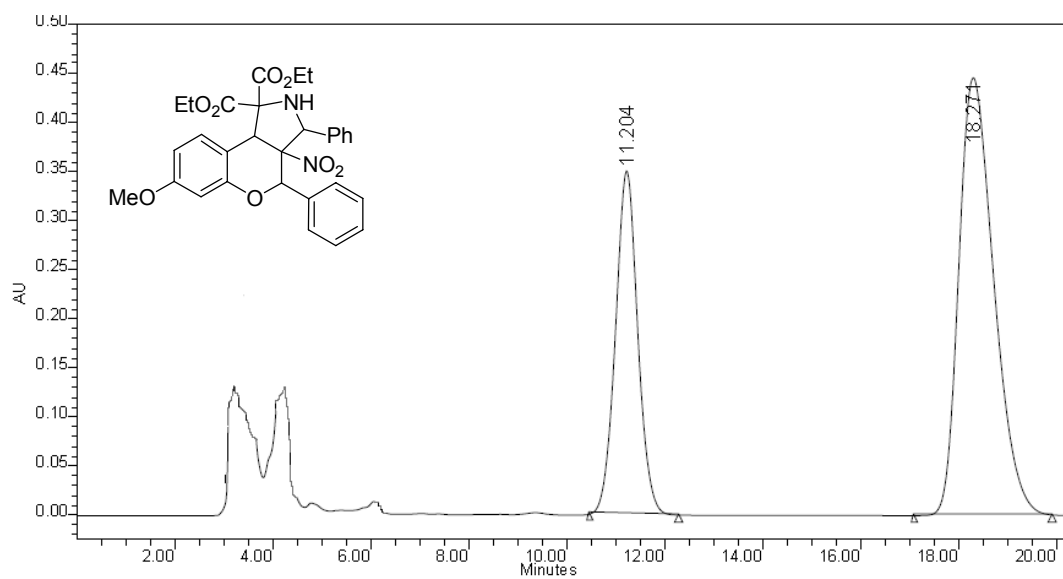

|   | RT (min) | Area (V*sec) | % Area | Height (V) | % Height |
|---|----------|--------------|--------|------------|----------|
| 1 | 11.204   | 11032708     | 33.33  | 349959     | 43.96    |
| 2 | 18.271   | 22071368     | 66.67  | 446090     | 56.04    |

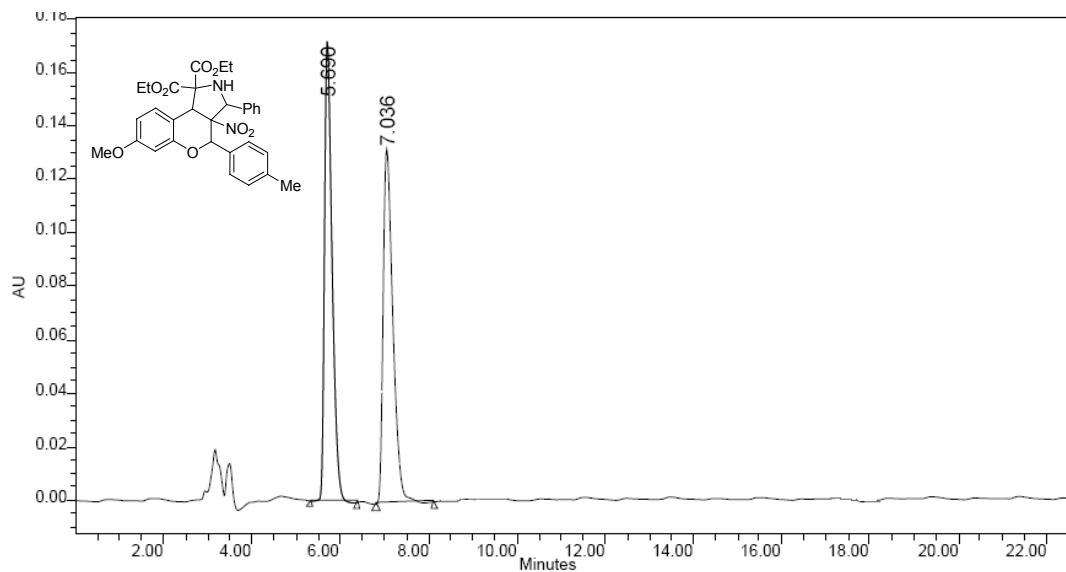

|   | RT (min) | Area (V*sec) | % Area | Height (V) | % Height |
|---|----------|--------------|--------|------------|----------|
| 1 | 5.690    | 2062327      | 50.37  | 172895     | 56.58    |
| 2 | 7.036    | 2031876      | 49.63  | 132682     | 43.42    |

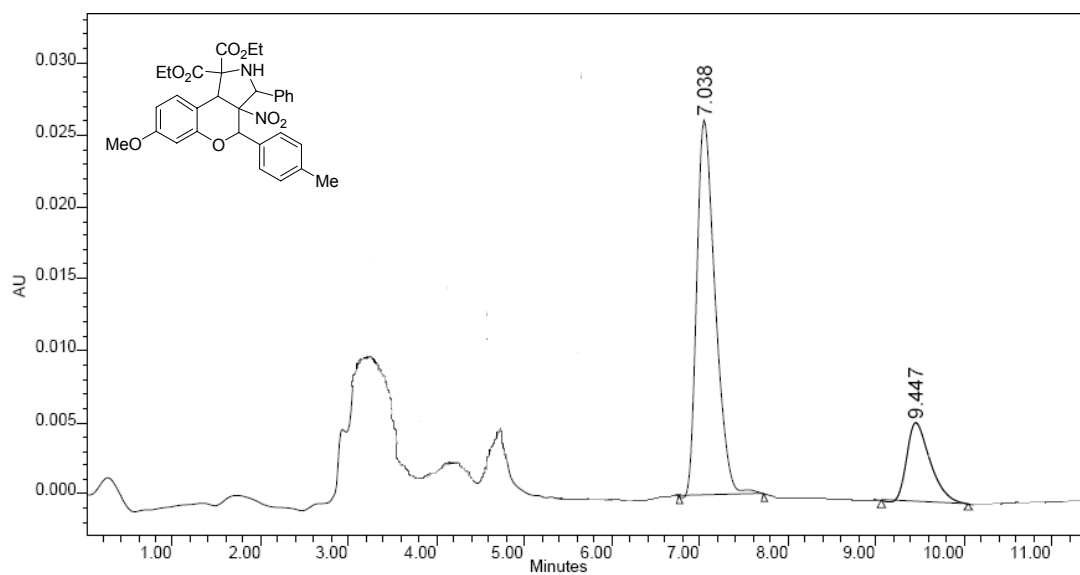

|   | RT (min) | Area (V*sec) | % Area | Height (V) | % Height |
|---|----------|--------------|--------|------------|----------|
| 1 | 7.038    | 385143       | 78.84  | 26216      | 82.54    |
| 2 | 9.447    | 103396       | 21.16  | 5546       | 17.46    |

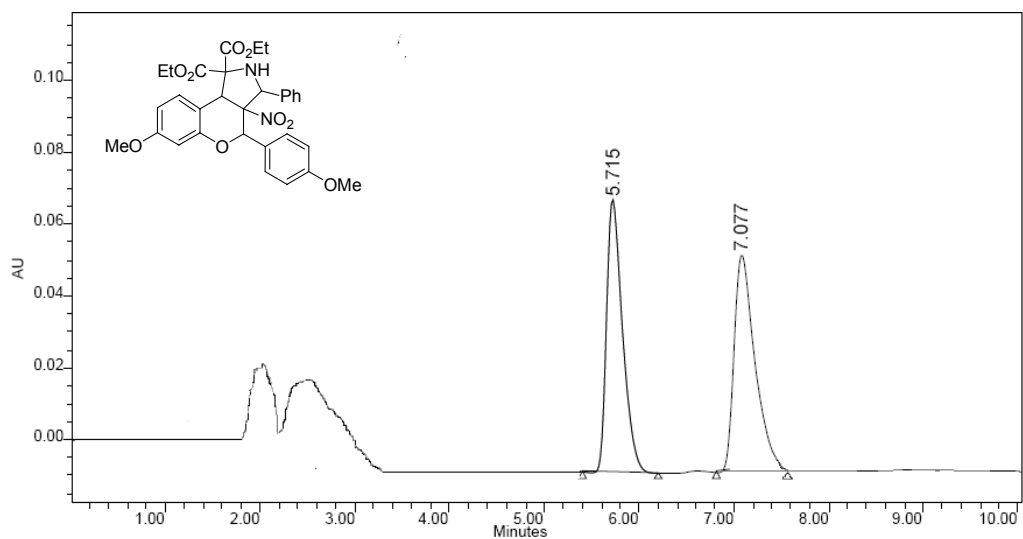

|   | RT (min) | Area (V*sec) | % Area | Height (V) | % Height |
|---|----------|--------------|--------|------------|----------|
| 1 | 5.715    | 888471       | 50.23  | 75879      | 56.06    |
| 2 | 7.077    | 880305       | 49.77  | 59479      | 43.94    |

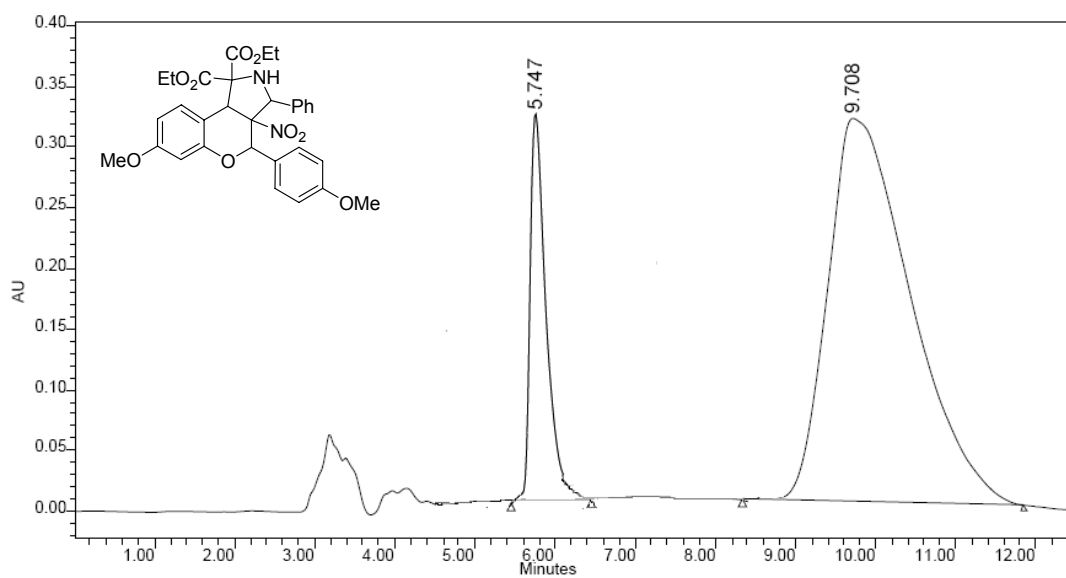

|   | RT (min) | Area (V*sec) | % Area | Height (V) | % Height |
|---|----------|--------------|--------|------------|----------|
| 1 | 5.747    | 4049789      | 15.02  | 313175     | 49.68    |
| 2 | 9.708    | 22920211     | 84.98  | 317220     | 50.32    |

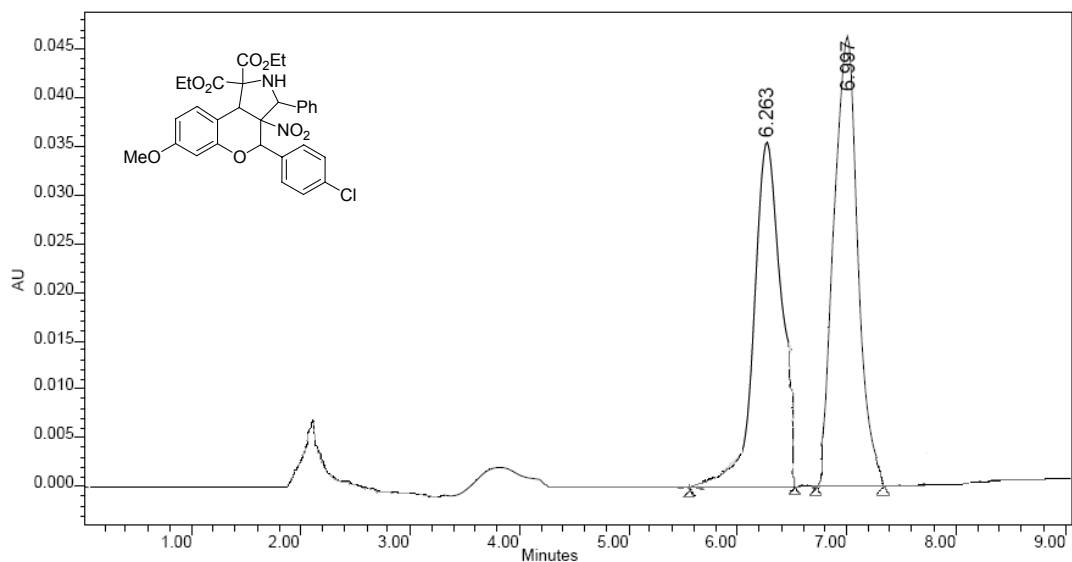

|   | RT (min) | Area (V*sec) | % Area | Height (V) | % Height |
|---|----------|--------------|--------|------------|----------|
| 1 | 6.263    | 628992       | 50.69  | 32086      | 42.62    |
| 2 | 6.997    | 611917       | 49.31  | 43202      | 57.38    |

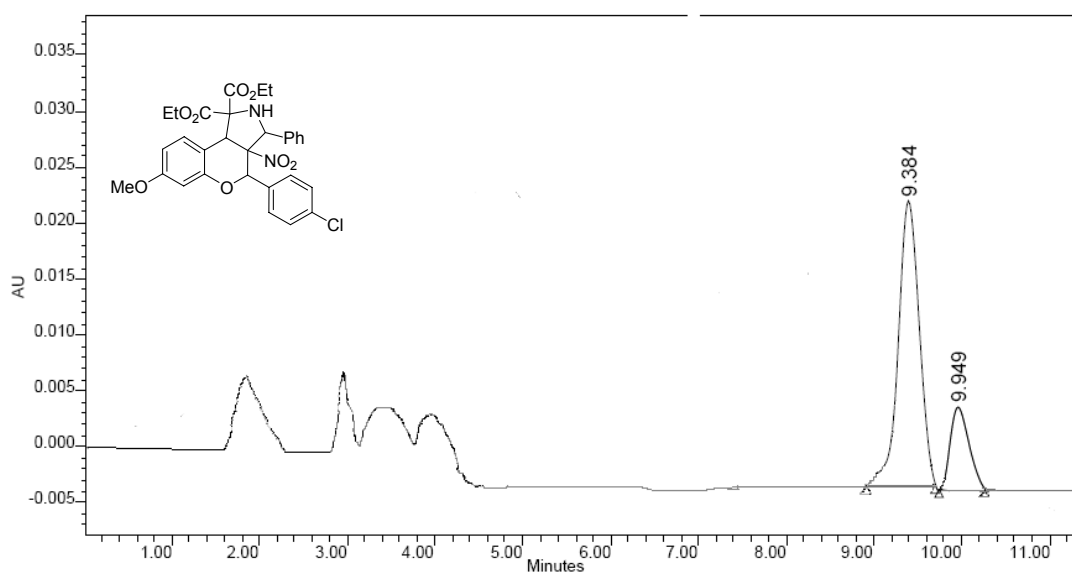

|   | RT (min) | Area (V*sec) | % Area | Height (V) | % Height |
|---|----------|--------------|--------|------------|----------|
| 1 | 9.384    | 386908       | 75.74  | 24694      | 76.17    |
| 2 | 9.949    | 123944       | 24.26  | 7727       | 23.83    |



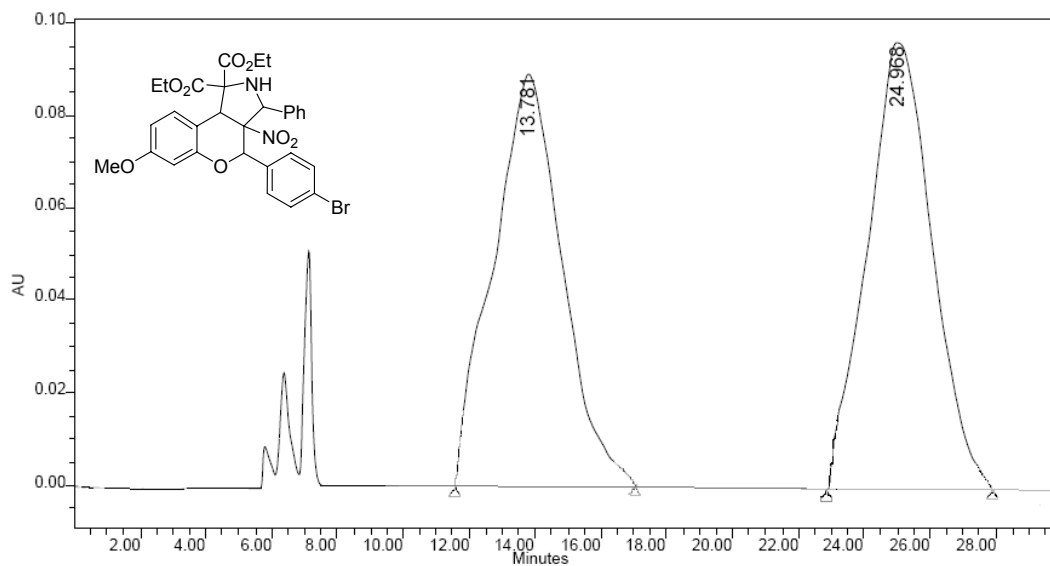

|   | RT (min) | Area (V*sec) | % Area | Height (V) | % Height |
|---|----------|--------------|--------|------------|----------|
| 1 | 13.781   | 12441361     | 49.39  | 86125      | 48.03    |
| 2 | 24.968   | 12748234     | 50.61  | 93172      | 51.97    |

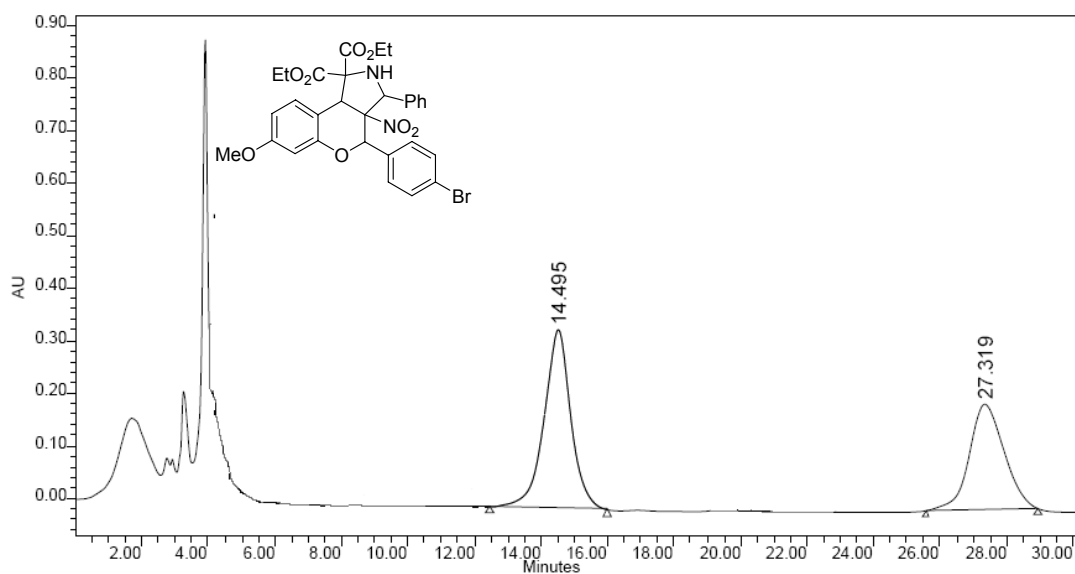

|   | RT (min) | Area (V*sec) | % Area | Height (V) | % Height |
|---|----------|--------------|--------|------------|----------|
| 1 | 14.495   | 19079690     | 56.55  | 339761     | 62.85    |
| 2 | 27.319   | 14658998     | 43.45  | 200795     | 37.15    |
